# Supplementary material
Source: Research Square preprint supplement (doi:10.21203/rs.3.rs-8994845/v1)
Supplement: Supplementary file 2 [file 68b09786597b458966dc3084.xlsx]

## Sheet: Sheet S1
Sheet S1.Patients general information and euler-number
Subject	sex(M=1/F=2)	age	NSSI(No=1/Yes=2)	ICD-10	TIV	Left Euler Number	Right Euler Number	Total Euler Number
sub001	2	11	1	F32.300	1.49719e+06	-44	-38	-82
sub002	2	12	1	F32.200	1.3947e+06	-54	-30	-84
sub003	2	12	1	F32.300	1.44278e+06	-34	-56	-90
sub004	2	13	1	F32.200	1.49653e+06	-56	-40	-96
sub005	2	13	1	F32.300	1.41451e+06	-52	-28	-80
sub006	1	13	1	F32.200	1.58663e+06	-58	-52	-110
sub007	2	13	1	F32.200	1.39652e+06	-30	-30	-60
sub008	2	13	1	F32.200	1.52528e+06	-46	-58	-104
sub009	2	13	1	F32.300	1.40647e+06	-90	-52	-142
sub010	2	13	1	F32.300	1.43489e+06	-44	-42	-86
sub011	2	14	1	F32.300	1.0007e+06	-54	-56	-110
sub012	2	14	1	F32.300	1.61012e+06	-30	-32	-62
sub013	2	13	1	F32.300	1.62282e+06	-32	-36	-68
sub014	1	14	1	F32.200	1.6549e+06	-74	-46	-120
sub015	2	14	1	F32.300	1.43639e+06	-34	-36	-70
sub016	2	14	1	F32.200	1.05181e+06	-18	-28	-46
sub017	2	14	1	F32.200	1.3853e+06	-60	-46	-106
sub018	2	14	1	F32.300	1.71532e+06	-50	-88	-138
sub019	2	14	1	F32.300	1.38444e+06	-74	-52	-126
sub020	2	14	1	F32.300	1.46307e+06	-44	-48	-92
sub021	2	14	1	F32.300	1.38062e+06	-38	-44	-82
sub022	1	14	1	F32.200	1.56765e+06	-52	-38	-90
sub023	2	14	1	F32.200	1.31496e+06	-46	-40	-86
sub024	2	15	1	F32.200	1.5183e+06	-18	-16	-34
sub025	2	15	1	F32.200	1.29008e+06	-32	-38	-70
sub026	2	17	1	F32.300	1.55853e+06	-28	-36	-64
sub027	1	15	1	F32.200	1.61807e+06	-60	-54	-114
sub028	2	15	1	F32.300	1.53259e+06	-62	-52	-114
sub029	1	15	1	F32.300	1.70628e+06	-26	-20	-46
sub030	2	15	1	F32.300	1.32846e+06	-58	-38	-96
sub031	2	16	1	F32.300	1.18238e+06	-48	-30	-78
sub032	2	15	1	F32.300	1.49786e+06	-48	-36	-84
sub033	2	16	1	F32.300	1.19843e+06	-22	-24	-46
sub034	2	15	1	F32.300	1.42209e+06	-36	-34	-70
sub035	2	16	1	F32.300	1.19797e+06	-82	-70	-152
sub036	2	17	1	F32.200	1.31273e+06	-28	-28	-56
sub037	2	16	1	F32.200	1.58793e+06	-38	-18	-56
sub038	2	16	1	F32.200	1.35231e+06	-104	-98	-202
sub039	1	16	1	F32.300	1.49117e+06	-36	-30	-66
sub040	2	16	1	F32.300	1.29898e+06	-32	-34	-66
sub041	2	16	1	F32.300	1.61939e+06	-28	-18	-46
sub042	1	15	1	F32.200	1.73039e+06	-54	-68	-122
sub043	2	16	1	F32.200	1.35781e+06	-58	-74	-132
sub044	2	16	1	F32.300	1.21099e+06	-32	-44	-76
sub045	2	16	1	F32.300	1.51764e+06	-20	-22	-42
sub046	2	16	1	F32.300	1.48411e+06	-154	-110	-264
sub047	1	18	1	F32.200	1.75123e+06	-60	-32	-92
sub048	2	16	1	F32.200	1.43508e+06	-36	-26	-62
sub049	1	16	1	F32.300	1.53538e+06	-66	-58	-124
sub050	1	16	1	F32.200	1.67028e+06	-18	-18	-36
sub051	1	16	1	F32.300	1.46151e+06	-30	-54	-84
sub052	1	16	1	F32.200	1.47172e+06	-32	-42	-74
sub053	1	16	1	F32.200	1.54467e+06	-48	-58	-106
sub054	1	16	1	F32.300	1.5987e+06	-62	-30	-92
sub055	1	17	1	F32.200	1.66793e+06	-40	-42	-82
sub056	2	17	1	F32.200	1.58912e+06	-84	-68	-152
sub057	1	17	1	F32.200	1.76684e+06	-12	-28	-40
sub058	2	17	1	F32.300	1.10316e+06	-58	-54	-112
sub059	1	17	1	F32.200	1.6747e+06	-28	-28	-56
sub060	2	17	1	F32.300	1.33383e+06	-78	-64	-142
sub061	2	17	1	F32.200	1.51978e+06	-40	-36	-76
sub062	2	17	1	F32.200	1.23693e+06	-78	-92	-170
sub063	1	17	1	F32.300	1.29337e+06	-42	-32	-74
sub064	2	17	1	F32.300	1.22099e+06	-76	-36	-112
sub065	2	17	1	F32.300	1.43995e+06	-30	-50	-80
sub066	1	18	1	F32.200	1.74159e+06	-56	-52	-108
sub067	2	17	1	F32.200	1.14323e+06	-50	-30	-80
sub068	2	17	1	F32.300	1.47358e+06	-54	-48	-102
sub069	1	17	1	F32.200	1.5431e+06	-40	-44	-84
sub070	2	17	1	F32.300	1.2986e+06	-42	-38	-80
sub071	1	17	1	F32.200	1.40534e+06	-36	-38	-74
sub072	1	17	1	F32.200	1.75573e+06	-58	-34	-92
sub073	2	17	1	F32.200	1.35215e+06	-48	-50	-98
sub074	1	17	1	F32.300	1.48889e+06	-26	-24	-50
sub075	2	18	1	F32.200	1.24691e+06	-26	-18	-44
sub076	1	18	1	F32.300	1.5766e+06	-84	-32	-116
sub077	1	18	1	F32.300	1.30115e+06	-48	-54	-102
sub078	2	18	1	F32.300	1.57029e+06	-52	-26	-78
sub079	2	18	1	F32.300	1.31324e+06	-54	-88	-142
sub080	1	18	1	F32.300	1.77615e+06	-40	-22	-62
sub081	1	19	1	F32.300	1.95986e+06	-32	-16	-48
sub082	1	19	1	F32.200	1.78971e+06	-64	-48	-112
sub083	2	19	1	F32.200	1.17659e+06	-50	-26	-76
sub084	2	19	1	F32.300	1.463e+06	-18	-22	-40
sub085	1	19	1	F32.300	1.35015e+06	-40	-34	-74
sub086	1	19	1	F32.300	1.87294e+06	-30	-26	-56
sub087	2	18	1	F32.300	1.4814e+06	-34	-24	-58
sub088	1	19	1	F32.300	1.69644e+06	-36	-44	-80
sub089	1	19	1	F32.300	1.63045e+06	-30	-16	-46
sub090	2	19	1	F32.200	1.29568e+06	-32	-24	-56
sub091	2	19	1	F32.200	1.57132e+06	-30	-32	-62
sub092	2	19	1	F32.300	1.6077e+06	-46	-28	-74
sub093	1	19	1	F32.200	1.59324e+06	-32	-26	-58
sub094	2	19	1	F32.300	1.29674e+06	-54	-26	-80
sub095	2	19	1	F32.200	1.37847e+06	-36	-32	-68
sub096	1	20	1	F32.300	1.61515e+06	-66	-44	-110
sub097	2	20	1	F32.300	1.62585e+06	-32	-38	-70
sub098	1	20	1	F32.300	1.78874e+06	-68	-48	-116
sub099	2	20	1	F32.300	1.39974e+06	-56	-48	-104
sub100	2	20	1	F32.300	1.50401e+06	-54	-40	-94
sub101	2	20	1	F32.300	1.63239e+06	-44	-64	-108
sub102	2	20	1	F32.300	1.24558e+06	-38	-52	-90
sub103	1	19	1	F32.200	1.59925e+06	-76	-54	-130
sub104	1	19	1	F32.200	1.47764e+06	-46	-46	-92
sub105	2	20	1	F32.300	1.37175e+06	-42	-28	-70
sub106	1	20	1	F32.300	1.58666e+06	-48	-42	-90
sub107	2	20	1	F32.300	1.32453e+06	-40	-38	-78
sub108	2	11	2	F32.300	1.23506e+06	-58	-56	-114
sub109	2	12	2	F32.200	1.57118e+06	-68	-64	-132
sub110	2	12	2	F32.200	1.48596e+06	-54	-46	-100
sub111	2	12	2	F32.300	1.46845e+06	-88	-60	-148
sub112	2	12	2	F32.200	1.41954e+06	-30	-36	-66
sub113	2	12	2	F32.200	1.39301e+06	-40	-34	-74
sub114	2	12	2	F32.200	1.39886e+06	-64	-68	-132
sub115	2	13	2	F32.200	1.7024e+06	-40	-38	-78
sub116	2	13	2	F32.200	1.47995e+06	-44	-30	-74
sub117	2	13	2	F32.200	1.24421e+06	-26	-14	-40
sub118	2	15	2	F32.200	1.4187e+06	-50	-68	-118
sub119	2	14	2	F32.300	1.61733e+06	-42	-40	-82
sub120	2	13	2	F32.200	1.38555e+06	-40	-30	-70
sub121	2	13	2	F32.300	1.32198e+06	-74	-58	-132
sub122	2	13	2	F32.300	1.23241e+06	-74	-78	-152
sub123	2	13	2	F32.200	1.33939e+06	-70	-28	-98
sub124	2	13	2	F32.300	1.44861e+06	-32	-48	-80
sub125	2	13	2	F32.300	1.11561e+06	-82	-50	-132
sub126	2	12	2	F32.300	1.34809e+06	-32	-24	-56
sub127	2	13	2	F32.300	1.56651e+06	-50	-54	-104
sub128	2	13	2	F32.200	1.48542e+06	-42	-34	-76
sub129	2	13	2	F32.200	1.50537e+06	-56	-40	-96
sub130	2	13	2	F32.300	1.49145e+06	-76	-70	-146
sub131	2	13	2	F32.200	1.5589e+06	-38	-34	-72
sub132	2	14	2	F32.200	1.30467e+06	-34	-54	-88
sub133	1	14	2	F32.200	1.72379e+06	-38	-42	-80
sub134	2	14	2	F32.200	1.34322e+06	-68	-28	-96
sub135	2	14	2	F32.300	1.26665e+06	-54	-20	-74
sub136	2	14	2	F32.200	1.57971e+06	-40	-38	-78
sub137	2	14	2	F32.300	1.5883e+06	-42	-58	-100
sub138	2	14	2	F32.300	1.22717e+06	-48	-28	-76
sub139	2	14	2	F32.200	1.19576e+06	-44	-20	-64
sub140	2	14	2	F32.300	1.36941e+06	-22	-26	-48
sub141	2	14	2	F32.200	1.39787e+06	-30	-34	-64
sub142	2	14	2	F32.300	1.2138e+06	-58	-42	-100
sub143	2	14	2	F32.300	1.26487e+06	-64	-52	-116
sub144	2	14	2	F32.300	1.61733e+06	-42	-40	-82
sub145	2	14	2	F32.300	1.53475e+06	-18	-14	-32
sub146	2	14	2	F32.300	1.06683e+06	-28	-30	-58
sub147	1	14	2	F32.200	1.6555e+06	-68	-74	-142
sub148	2	14	2	F32.200	1.49163e+06	-70	-52	-122
sub149	2	14	2	F32.200	1.47685e+06	-48	-46	-94
sub150	2	14	2	F32.300	1.3608e+06	-50	-46	-96
sub151	2	14	2	F32.200	1.16713e+06	-46	-32	-78
sub152	2	14	2	F32.300	1.30445e+06	-60	-46	-106
sub153	2	14	2	F32.300	1.23513e+06	-22	-34	-56
sub154	2	15	2	F32.200	1.53322e+06	-54	-38	-92
sub155	2	15	2	F32.300	1.27991e+06	-52	-54	-106
sub156	1	15	2	F32.200	1.49039e+06	-70	-60	-130
sub157	2	15	2	F32.200	1.06155e+06	-54	-62	-116
sub158	2	15	2	F32.300	1.2196e+06	-54	-68	-122
sub159	2	15	2	F32.300	1.42167e+06	-44	-34	-78
sub160	2	15	2	F32.300	1.33446e+06	-64	-62	-126
sub161	2	16	2	F32.200	1.65342e+06	-46	-46	-92
sub162	1	15	2	F32.200	1.8668e+06	-40	-50	-90
sub163	1	14	2	F32.300	1.6162e+06	-48	-30	-78
sub164	2	15	2	F32.200	1.08833e+06	-44	-50	-94
sub165	1	15	2	F32.200	1.76718e+06	-30	-26	-56
sub166	2	15	2	F32.200	1.46453e+06	-62	-60	-122
sub167	1	15	2	F32.300	1.56451e+06	-34	-22	-56
sub168	2	15	2	F32.300	1.06715e+06	-38	-34	-72
sub169	2	15	2	F32.200	1.36075e+06	-34	-38	-72
sub170	2	15	2	F32.200	1.58038e+06	-56	-56	-112
sub171	2	15	2	F32.200	1.51957e+06	-46	-26	-72
sub172	2	15	2	F32.300	1.20617e+06	-62	-48	-110
sub173	1	14	2	F32.300	1.73692e+06	-60	-64	-124
sub174	2	15	2	F32.200	1.4798e+06	-78	-70	-148
sub175	2	15	2	F32.300	1.32223e+06	-32	-38	-70
sub176	2	15	2	F32.300	1.32926e+06	-52	-20	-72
sub177	2	15	2	F32.200	1.52903e+06	-62	-62	-124
sub178	2	15	2	F32.200	1.70743e+06	-36	-32	-68
sub179	2	16	2	F32.200	1.36043e+06	-66	-60	-126
sub180	2	16	2	F32.300	1.50271e+06	-66	-50	-116
sub181	2	16	2	F32.200	1.49154e+06	-54	-70	-124
sub182	1	16	2	F32.200	1.80683e+06	-30	-32	-62
sub183	1	16	2	F32.200	1.68568e+06	-42	-36	-78
sub184	1	16	2	F32.200	1.90503e+06	-52	-58	-110
sub185	2	16	2	F32.200	1.2977e+06	-50	-22	-72
sub186	1	16	2	F32.300	1.63152e+06	-36	-48	-84
sub187	1	16	2	F32.200	1.53e+06	-36	-30	-66
sub188	2	16	2	F32.200	1.36139e+06	-26	-14	-40
sub189	2	16	2	F32.200	1.44226e+06	-32	-18	-50
sub190	2	16	2	F32.300	1.27767e+06	-58	-42	-100
sub191	2	16	2	F32.200	1.57137e+06	-32	-16	-48
sub192	2	16	2	F32.200	1.40706e+06	-50	-34	-84
sub193	2	17	2	F32.300	1.35185e+06	-28	-40	-68
sub194	2	16	2	F32.300	1.45868e+06	-46	-38	-84
sub195	2	16	2	F32.200	1.48235e+06	-58	-26	-84
sub196	2	16	2	F32.200	1.83819e+06	-92	-54	-146
sub197	1	16	2	F32.300	1.52437e+06	-84	-56	-140
sub198	2	16	2	F32.300	1.1414e+06	-10	-24	-34
sub199	2	16	2	F32.200	1.46065e+06	-36	-36	-72
sub200	1	16	2	F32.200	1.54258e+06	-36	-18	-54
sub201	1	16	2	F32.300	1.59399e+06	-16	-32	-48
sub202	2	16	2	F32.300	1.56587e+06	-82	-70	-152
sub203	2	15	2	F32.300	1.52555e+06	-34	-40	-74
sub204	2	16	2	F32.200	1.27831e+06	-30	-42	-72
sub205	2	16	2	F32.300	1.26231e+06	-34	-14	-48
sub206	2	17	2	F32.200	1.65626e+06	-30	-20	-50
sub207	1	17	2	F32.300	1.65476e+06	-20	-34	-54
sub208	2	16	2	F32.300	1.47767e+06	-52	-58	-110
sub209	1	17	2	F32.300	1.80284e+06	-36	-26	-62
sub210	2	18	2	F32.200	1.35332e+06	-50	-44	-94
sub211	1	16	2	F32.200	1.49189e+06	-50	-40	-90
sub212	2	17	2	F32.200	1.43211e+06	-54	-38	-92
sub213	2	17	2	F32.200	1.35444e+06	-64	-40	-104
sub214	2	17	2	F32.300	1.4989e+06	-28	-30	-58
sub215	2	17	2	F32.200	1.38288e+06	-30	-52	-82
sub216	2	17	2	F32.200	993681	-48	-48	-96
sub217	2	17	2	F32.300	1.18528e+06	-30	-48	-78
sub218	2	17	2	F32.200	1.39344e+06	-42	-42	-84
sub219	2	17	2	F32.300	1.37138e+06	-40	-34	-74
sub220	2	17	2	F32.200	1.54337e+06	-40	-30	-70
sub221	2	17	2	F32.200	1.10527e+06	-62	-34	-96
sub222	1	17	2	F32.300	1.50845e+06	-58	-56	-114
sub223	2	17	2	F32.300	1.37138e+06	-40	-40	-80
sub224	1	17	2	F32.300	1.71869e+06	-36	-36	-72
sub225	1	18	2	F32.200	1.7497e+06	-44	-28	-72
sub226	2	19	2	F32.200	1.6215e+06	-20	-12	-32
sub227	2	18	2	F32.200	1.27492e+06	-38	-38	-76
sub228	2	18	2	F32.300	1.26584e+06	-24	-22	-46
sub229	2	18	2	F32.300	1.21315e+06	-68	-44	-112
sub230	1	19	2	F32.200	1.4605e+06	-52	-34	-86
sub231	2	19	2	F32.200	1.39327e+06	-16	-26	-42
sub232	2	19	2	F32.200	1.58171e+06	-38	-42	-80
sub233	2	19	2	F32.200	1.15831e+06	-44	-34	-78
sub234	1	19	2	F32.200	1.64815e+06	-78	-62	-140
sub235	2	19	2	F32.300	1.28015e+06	-44	-50	-94
sub236	2	19	2	F32.300	1.33001e+06	-30	-30	-60
sub237	2	19	2	F32.200	1.16947e+06	-48	-42	-90
sub238	2	20	2	F32.300	1.31248e+06	-48	-56	-104
sub239	2	20	2	F32.200	1.34171e+06	-36	-40	-76
sub240	2	20	2	F32.300	1.55328e+06	-82	-34	-116
sub241	2	20	2	F32.200	1.59062e+06	-30	-20	-50

## Sheet: Sheet S2
Sheet S2. Results of neurotransmitter receptor
	name	z_value	p_value	p_fdr_BH
VMAT2_dtbz_HC76_larsen2020.nii	VMAT2	0.2172	0.00039996	0.017598
5HT1a_WAY_HC36.nii	5HT1a	0.5107	0.0012999	0.028597
D2_fallypride_hc49_jaworska.nii	D2	0.3502	0.0042996	0.047295
FDOPA_f18.nii	FDOPA	0.4402	0.0036996	0.047295
5HT1a_cumi_hc8_beliveau.nii	5HT1a*	0.4039	0.0093991	0.047595
5HT4_sb20_hc59_beliveau.nii	5HT4	0.3037	0.0084992	0.047595
GABAa5_ro154513_HC10_lukow2022.nii	GABAa5	0.4238	0.011899	0.047595
GABAa_flumazenil_hc16_norgaard.nii	GABAa	-0.3031	0.010099	0.047595
MU_CARFENTANIL_c11.nii	MU	0.471	0.0072993	0.047595
mGluR5_abp_hc28_dubois.nii	mGluR5	0.3687	0.0061994	0.047595
mGluR5_abp_hc73_smart.nii	mGluR5*	0.3321	0.011499	0.047595
MU_carfentanil_hc39_turtonen.nii	MU	0.4362	0.023298	0.081223
VAChT_feobv_hc5_bedard.nii	VAChT	0.3038	0.023998	0.081223
MOR_carfentanil_HC39_turtonen2021.nii	MOR	0.4149	0.041496	0.13042
MOR_carfentanil_HC204_kantonen2020.nii	MOR	0.4276	0.056394	0.16542
NMDA_ge179_29hc_galovic2021.nii	NMDA	0.1979	0.060494	0.16636
DAT_DATSPECT.nii	DAT	0.2585	0.087391	0.22619
5HT2a_cimbi_hc29_beliveau.nii	5HT2a	0.1683	0.13719	0.32491
COX1_ps13_HC11_kim2020.nii	COX1	-0.2746	0.14559	0.32491
KappaOp_LY2795050_hc10_ShokriKojori.nii	KappaOp	0.3194	0.14769	0.32491
5HT6_gsk215083_HC30_radhakrishnan2018.nii	5HT6	0.1723	0.17018	0.34037
VAChT_feobv_hc18_aghourian.nii	VAChT	0.2349	0.16388	0.34037
5HT2a_ALT_HC19.nii	5HT2a	0.1908	0.17818	0.34087
mGluR5_abp_hc22_rosaneto.nii	mGluR5	0.1858	0.19898	0.3648
D1_SCH23390_c11.nii	D1	0.234	0.25497	0.44876
PETatlas/NAT_MRB_c11.nii	NAT	0.133	0.32557	0.55096
CB1_omar_HC77_normandin2015.nii	CB1	0.1715	0.34627	0.56428
KOR_ly2795050_HC28_vijay2018.nii	KOR	0.1771	0.37076	0.58263
CB1_FMPEPd2_hc22_laurikainen.nii	CB1	0.1839	0.39476	0.59895
A4B2_flubatine_HC30_hillmer2016.nii	A4B2	0.1357	0.49335	0.67836
Microglia_TSPO_pbr28_HC6_lois2018.nii	Microglia	0.1072	0.49155	0.67836
SV2A_ucbj_HC10_finnema2016.nii	SV2A	0.103	0.46565	0.67836
SERT_DASB_HC30.nii	SERT	0.0561	0.58934	0.78579
D2_RACLOPRIDE_c11.nii	D2	-0.0763	0.62454	0.80823
SERT_MADAM_c11.nii	SERT	-0.0396	0.64824	0.81492
SERT_dasb_hc100_beliveau.nii	SERT	0.0233	0.68203	0.83359
VAChT_feobv_hc4_tuominen.nii	VAChT	0.0221	0.70233	0.8352
M1_lsn3172176_HC24_naganawa2020.nii	M1	0.0444	0.76512	0.88593
HDAC_martinostat_HC8_wey2016.nii	HDAC	-0.0412	0.80972	0.91353
5HT1b_P943_HC22.nii	5HT1b	-0.0263	0.88521	0.9509
5HT1b_az_hc36_beliveau.nii	5HT1b	-0.0101	0.92251	0.9509
CBF_ASL_MRI.nii	CBF	0.0122	0.93391	0.9509
CMRglu_fdg_HC20_castrillon2023.nii	CMRglu	0.0211	0.89861	0.9509
GABAa_FLUMAZENIL_c11.nii	GABAa	-0.009	0.9509	0.9509
*Indicating the presence of previously occurring and repeated statistically significant neurotransmitters

## Sheet: Sheet S3
Sheet S3. Explanation of Composition Differences in PLS1 ~ PLS8
Component	R_squared(%)	P_value
1	39.5323	0
2	54.9421	0
3	61.0385	0
4	70.9974	0
5	76.6254	0
6	83.7519	0
7	87.8763	0
8	90.4705	0.0001

## Sheet: Sheet S4
Sheet S4. Results of PLS weighted Z scores for PLS1 +/- genes
PLS1- gene lists						PLS1+ gene lists
gene	gene_index	Z_score	p_value	p_fdr		gene	gene_index	Z_score	p_value	p_fdr
ZNF81	15546	-4.19413	2.7e-05	9.9e-05		MMD	8042	13.3359	0	0
PARP3	9409	-4.19416	2.7e-05	9.9e-05		DDAH1	3231	13.2394	0	0
MUTYH	8353	-4.198	2.7e-05	9.8e-05		IFT22	5972	13.2369	0	0
GPR135	5217	-4.19809	2.7e-05	9.8e-05		NT5DC3	9014	13.1599	0	0
C2orf54	1594	-4.19885	2.7e-05	9.7e-05		DYNLL1	3692	13.0829	0	0
RCC1L	10955	-4.20051	2.7e-05	9.7e-05		TIMM8B	13441	12.9576	0	0
STX8	12935	-4.20221	2.6e-05	9.6e-05		MGST1	7938	12.8686	0	0
ZFAND4	15015	-4.20436	2.6e-05	9.5e-05		SYT17	13057	12.6949	0	0
NUP35	9080	-4.20494	2.6e-05	9.5e-05		TMSB10	13752	12.6798	0	0
IGFBPL1	5996	-4.20521	2.6e-05	9.5e-05		GABRA5	4830	12.6324	0	0
LOXL2	7337	-4.20583	2.6e-05	9.5e-05		DKFZp779M0652	3420	12.5559	0	0
CHRNA2	2445	-4.20913	2.6e-05	9.3e-05		EFNB3	3794	12.5149	0	0
GPR119	5214	-4.21164	2.5e-05	9.2e-05		CETN2	2337	12.4938	0	0
SARM1	11581	-4.21242	2.5e-05	9.2e-05		SSTR1	12790	12.3947	0	0
KIF2C	6535	-4.21245	2.5e-05	9.2e-05		XYLT1	14844	12.3771	0	0
AFTPH	322	-4.2125	2.5e-05	9.2e-05		RAB27B	10708	12.312	0	0
CDK8	2216	-4.21641	2.5e-05	9.1e-05		PPP4R4	10273	12.2573	0	0
SIRT7	11998	-4.21703	2.5e-05	9e-05		SHISAL1	11951	12.2034	0	0
ANKRD49	593	-4.21719	2.5e-05	9e-05		TUBB6	14210	12.1994	0	0
PDCD11	9544	-4.21765	2.5e-05	9e-05		KCNMB4	6398	12.1927	0	0
CLCN4	2521	-4.21844	2.5e-05	9e-05		UBA52	14279	12.1856	0	0
FAM193B	4298	-4.21964	2.4e-05	8.9e-05		NUDT11	9047	12.1575	0	0
RBKS	10895	-4.21966	2.4e-05	8.9e-05		LY6H	7498	12.1557	0	0
MED23	7814	-4.21971	2.4e-05	8.9e-05		GMFB	5085	12.1465	0	0
PBRM1	9439	-4.21997	2.4e-05	8.9e-05		NDUFAF8	8623	12.1284	0	0
MOK	8075	-4.22024	2.4e-05	8.9e-05		RHBDD2	11078	12.0684	0	0
HDHD2	5524	-4.2207	2.4e-05	8.9e-05		MAPK3	7657	12.0652	0	0
XRN2	14841	-4.221	2.4e-05	8.9e-05		C1QL3	1523	12.0648	0	0
FEN1	4531	-4.22285	2.4e-05	8.8e-05		PHPT1	9758	12.0644	0	0
RWDD2B	11513	-4.22316	2.4e-05	8.8e-05		DYDC2	3683	12.0592	0	0
B4GALT6	1142	-4.22423	2.4e-05	8.8e-05		GABRB1	4831	12.041	0	0
HYDIN2	5894	-4.22434	2.4e-05	8.8e-05		DPYSL3	3607	12.0308	0	0
ZNF213	15147	-4.22494	2.4e-05	8.8e-05		PKIA	9868	11.9953	0	0
ANKRD20A12P	564	-4.22956	2.3e-05	8.6e-05		GDA	4934	11.9634	0	0
STAT5B	12855	-4.22987	2.3e-05	8.6e-05		PID1	9783	11.9625	0	0
SMARCA4	12347	-4.23013	2.3e-05	8.6e-05		NOV	8882	11.8791	0	0
ZNF334	15224	-4.2305	2.3e-05	8.6e-05		SNRNP27	12471	11.8688	0	0
LIAS	6892	-4.23156	2.3e-05	8.5e-05		SULF2	12959	11.8646	0	0
METAP2	7859	-4.23165	2.3e-05	8.5e-05		FKBP1A	4602	11.8166	0	0
LOC155060	7233	-4.23173	2.3e-05	8.5e-05		RBP4	10940	11.7725	0	0
SOX12	12559	-4.23175	2.3e-05	8.5e-05		C11orf97	1450	11.7451	0	0
SH3BP1	11914	-4.23176	2.3e-05	8.5e-05		ZNF706	15475	11.6744	0	0
RALB	10795	-4.23493	2.3e-05	8.4e-05		FXYD6	4787	11.6711	0	0
PTPDC1	10576	-4.23777	2.3e-05	8.3e-05		TPST1	13905	11.6698	0	0
CEP162	2298	-4.23804	2.3e-05	8.3e-05		SLIT1	12316	11.649	0	0
VASH2	14554	-4.23836	2.3e-05	8.3e-05		LOC440934	7272	11.6299	0	0
TMEM38A	13685	-4.23849	2.3e-05	8.3e-05		SNX7	12522	11.5924	0	0
DEGS2	3300	-4.24015	2.2e-05	8.2e-05		CHID1	2412	11.5843	0	0
TUBGCP3	14218	-4.2411	2.2e-05	8.2e-05		CENPVL3	2287	11.5835	0	0
UPF2	14428	-4.2461	2.2e-05	8e-05		RIIAD1	11115	11.5674	0	0
GMNN	5088	-4.25093	2.1e-05	7.9e-05		B3GALT6	1122	11.5547	0	0
MPP5	8114	-4.25121	2.1e-05	7.9e-05		TXN	14243	11.5427	0	0
HNRNPA3P1	5746	-4.25125	2.1e-05	7.9e-05		UHMK1	14394	11.5416	0	0
RPE	11284	-4.25246	2.1e-05	7.8e-05		RAP2B	10825	11.5325	0	0
HLA-DPB1	5688	-4.25419	2.1e-05	7.8e-05		SPPL3	12674	11.5152	0	0
FRMD5	4729	-4.25565	2.1e-05	7.7e-05		LDHD	6841	11.4954	0	0
ZNF132	15106	-4.25652	2.1e-05	7.7e-05		TIMM10	13428	11.4951	0	0
DOPEY2	3570	-4.26106	2e-05	7.6e-05		BAIAP3	1168	11.4819	0	0
KLF3-AS1	6571	-4.26232	2e-05	7.5e-05		C8orf46	1664	11.473	0	0
SLC25A27	12105	-4.26308	2e-05	7.5e-05		PRKCD	10351	11.4682	0	0
MED12	7800	-4.26583	2e-05	7.4e-05		NIT2	8780	11.4548	0	0
IQSEC3	6166	-4.26621	2e-05	7.4e-05		KLK7	6622	11.4151	0	0
ZNF92	15577	-4.26623	2e-05	7.4e-05		HTR7P1	5881	11.4146	0	0
APOL2	695	-4.26639	2e-05	7.4e-05		LINC01140	7003	11.3991	0	0
TRIM67	14011	-4.26659	2e-05	7.4e-05		RIPOR2	11140	11.3936	0	0
TANGO2	13122	-4.26919	2e-05	7.3e-05		PCDH20	9465	11.3898	0	0
RERG	11002	-4.27035	2e-05	7.3e-05		SLC26A4-AS1	12138	11.3812	0	0
LOC284009	7238	-4.27043	2e-05	7.3e-05		PLPPR3	9987	11.372	0	0
PNPO	10055	-4.27072	1.9e-05	7.3e-05		SCN3B	11653	11.3704	0	0
MAML1	7584	-4.27117	1.9e-05	7.3e-05		PEA15	9628	11.3445	0	0
METTL17	7867	-4.27123	1.9e-05	7.3e-05		HIST1H2BK	5641	11.3362	0	0
TBC1D2B	13185	-4.27266	1.9e-05	7.2e-05		LRRN2	7443	11.305	0	0
NR1H2	8937	-4.27273	1.9e-05	7.2e-05		CHCHD6	2390	11.274	0	0
NXPE3	9104	-4.27818	1.9e-05	7e-05		MRAS	8130	11.2676	0	0
CDKN2AIP	2228	-4.27837	1.9e-05	7e-05		EFCAB1	3770	11.2589	0	0
OSBPL9	9257	-4.27968	1.9e-05	7e-05		DTNBP1	3640	11.2397	0	0
ELMOD1	3898	-4.28016	1.9e-05	7e-05		TM2D3	13491	11.2346	0	0
SPOCK2	12663	-4.28019	1.9e-05	7e-05		SH3RF1	11929	11.2241	0	0
MSANTD2	8241	-4.2808	1.9e-05	7e-05		WDR66	14735	11.1712	0	0
MBLAC1	7727	-4.28178	1.9e-05	6.9e-05		ADRA1B	295	11.171	0	0
EML5	3944	-4.2839	1.8e-05	6.9e-05		SSTR2	12791	11.1044	0	0
ZFYVE9	15056	-4.2843	1.8e-05	6.9e-05		ERICH6-AS1	4070	11.0854	0	0
CRYGD	2917	-4.28476	1.8e-05	6.9e-05		CD63	2116	11.0763	0	0
NOB1	8843	-4.28483	1.8e-05	6.9e-05		CANX	1790	11.0732	0	0
ABCG1	57	-4.28606	1.8e-05	6.8e-05		C5orf49	1632	11.0598	0	0
TBC1D31	13187	-4.28661	1.8e-05	6.8e-05		CENPW	2288	11.0553	0	0
PCDHB13	9476	-4.28777	1.8e-05	6.8e-05		DDA1	3230	11.0393	0	0
GAD2	4840	-4.28888	1.8e-05	6.7e-05		CTXN1	3024	11.0253	0	0
DNAJC5G	3514	-4.28895	1.8e-05	6.7e-05		HRH1	5804	11.0152	0	0
ZNF711	15482	-4.28965	1.8e-05	6.7e-05		PRNP	10383	11.0148	0	0
JARID2	6272	-4.29309	1.8e-05	6.6e-05		TNNT1	13806	11.0108	0	0
CNTNAP5	2674	-4.2936	1.8e-05	6.6e-05		YWHAH	14888	11.002	0	0
ZNF598	15398	-4.295	1.7e-05	6.6e-05		WNT10B	14784	10.9972	0	0
TRMT13	14037	-4.29623	1.7e-05	6.5e-05		ARHGEF28	795	10.9928	0	0
RAD51-AS1	10777	-4.29652	1.7e-05	6.5e-05		TFPT	13348	10.9858	0	0
NMD3	8821	-4.29674	1.7e-05	6.5e-05		MSANTD1	8240	10.9578	0	0
HIST1H3A	5646	-4.29696	1.7e-05	6.5e-05		SVOP	13002	10.9297	0	0
ZBED1	14900	-4.29702	1.7e-05	6.5e-05		ATP2B4	1019	10.9264	0	0
EMB	3919	-4.29871	1.7e-05	6.5e-05		GABRA3	4828	10.9243	0	0
TRIO	14019	-4.29871	1.7e-05	6.5e-05		UG0898H09	14386	10.9165	0	0
PLXNA4	10001	-4.29884	1.7e-05	6.5e-05		NTSR1	9031	10.9066	0	0
PEX6	9669	-4.30252	1.7e-05	6.4e-05		SMIM29	12393	10.8924	0	0
MTFP1	8294	-4.30266	1.7e-05	6.4e-05		NIPSNAP3A	8776	10.8839	0	0
CKAP2	2501	-4.30427	1.7e-05	6.3e-05		CEBPA	2250	10.8722	0	0
UTP15	14526	-4.30638	1.7e-05	6.3e-05		ORC6	9241	10.8388	0	0
ABHD13	66	-4.30654	1.7e-05	6.3e-05		SMIM10L2A	12380	10.8369	0	0
INO80	6097	-4.30773	1.6e-05	6.2e-05		CTNND2	2998	10.8349	0	0
PRKCA	10349	-4.31118	1.6e-05	6.1e-05		TRAPPC2L	13950	10.8342	0	0
WWP2	14810	-4.31135	1.6e-05	6.1e-05		SMARCD3	12356	10.8337	0	0
ARID5B	812	-4.31545	1.6e-05	6e-05		UCHL3	14370	10.8317	0	0
C3orf58	1614	-4.31563	1.6e-05	6e-05		TUBB2A	14205	10.8284	0	0
FTSJ3	4758	-4.31601	1.6e-05	6e-05		FAM71F1	4373	10.8025	0	0
QSER1	10678	-4.31658	1.6e-05	6e-05		LARGE1	6784	10.7994	0	0
WDR73	14738	-4.31875	1.6e-05	6e-05		LINC01197	7009	10.7983	0	0
ZDHHC18	14992	-4.31975	1.6e-05	5.9e-05		CREM	2878	10.7722	0	0
CNBP	2620	-4.32008	1.6e-05	5.9e-05		TMEM158	13581	10.7714	0	0
ZNF415	15263	-4.32034	1.6e-05	5.9e-05		NECAB2	8654	10.755	0	0
IRS1	6182	-4.32067	1.6e-05	5.9e-05		SNCA	12438	10.7487	0	0
CRTAP	2903	-4.32229	1.5e-05	5.9e-05		TMTC1	13757	10.7303	0	0
RGS7	11072	-4.32653	1.5e-05	5.8e-05		SLA	12012	10.7218	0	0
FAM219A	4331	-4.32792	1.5e-05	5.7e-05		GSKIP	5348	10.7049	0	0
POPDC2	10136	-4.32919	1.5e-05	5.7e-05		BCRP2	1242	10.7009	0	0
PWWP2A	10644	-4.32967	1.5e-05	5.7e-05		GNG4	5120	10.6922	0	0
STAMBPL1	12837	-4.33007	1.5e-05	5.7e-05		RAET1E-AS1	10788	10.6831	0	0
HAT1	5468	-4.33026	1.5e-05	5.7e-05		LOC100288911	7139	10.6811	0	0
MACO1	7539	-4.33132	1.5e-05	5.6e-05		CCDC3	1958	10.677	0	0
AMH	496	-4.33345	1.5e-05	5.6e-05		LYPD8	7513	10.674	0	0
ADAM20P1	207	-4.33359	1.5e-05	5.6e-05		SLN	12327	10.665	0	0
CDC42EP3	2153	-4.3352	1.5e-05	5.6e-05		FAM120AOS	4225	10.6567	0	0
LCE2A	6814	-4.33603	1.5e-05	5.5e-05		C2CD4C	1584	10.6392	0	0
SMAD5	12339	-4.33669	1.4e-05	5.5e-05		OST4	9265	10.6284	0	0
CAMTA1	1785	-4.33748	1.4e-05	5.5e-05		NKAIN3	8783	10.6198	0	0
TBL1X	13207	-4.33909	1.4e-05	5.5e-05		CRIP2	2883	10.5997	0	0
UBL7-AS1	14342	-4.34077	1.4e-05	5.4e-05		PLPPR2	9986	10.5897	0	0
FAM217B	4329	-4.34136	1.4e-05	5.4e-05		MBOAT7	7734	10.5855	0	0
ANKRD18DP	560	-4.34226	1.4e-05	5.4e-05		DOK6	3564	10.5804	0	0
LINC01000	6987	-4.34276	1.4e-05	5.4e-05		BIRC3	1289	10.5618	0	0
HS6ST2	5817	-4.34489	1.4e-05	5.3e-05		TUBB4B	14209	10.5549	0	0
NUP210	9078	-4.34837	1.4e-05	5.3e-05		EFHC2	3782	10.5494	0	0
ZNF395	15254	-4.3485	1.4e-05	5.3e-05		NEDD4L	8662	10.5454	0	0
UVRAG	14536	-4.35287	1.3e-05	5.2e-05		ANO3	609	10.5399	0	0
NUP188	9076	-4.35334	1.3e-05	5.2e-05		FAM110C	4214	10.53	0	0
LINC00999	6986	-4.35398	1.3e-05	5.1e-05		TMEM263	13673	10.5199	0	0
CWC22	3043	-4.35402	1.3e-05	5.1e-05		FADS3	4192	10.4931	0	0
ACVR1C	190	-4.35503	1.3e-05	5.1e-05		BABAM2	1151	10.4872	0	0
AFG3L1P	319	-4.35634	1.3e-05	5.1e-05		CACNG3	1732	10.4866	0	0
CXorf36	3065	-4.35845	1.3e-05	5e-05		ASCL2	914	10.4855	0	0
NEURL2	8701	-4.35971	1.3e-05	5e-05		POLE4	10080	10.4776	0	0
TANC1	13120	-4.36088	1.3e-05	5e-05		PACRG	9331	10.4669	0	0
KIF23	6529	-4.36109	1.3e-05	5e-05		CD83	2123	10.4601	0	0
ZKSCAN8	15075	-4.36182	1.3e-05	5e-05		IFI27L2	5942	10.4593	0	0
BCAS4	1207	-4.36217	1.3e-05	5e-05		OPRM1	9174	10.4548	0	0
AQR	720	-4.36411	1.3e-05	4.9e-05		CXorf57	3068	10.4067	0	0
HBP1	5484	-4.3688	1.2e-05	4.8e-05		ENOX1	3972	10.3913	0	0
DYNLL2	3693	-4.3718	1.2e-05	4.8e-05		MESP1	7853	10.385	0	0
SNTG1	12490	-4.37264	1.2e-05	4.8e-05		CLU	2592	10.379	0	0
RARG	10840	-4.37271	1.2e-05	4.8e-05		PCBD1	9448	10.3562	0	0
LARP7	6791	-4.37326	1.2e-05	4.7e-05		FKBP1B	4603	10.3528	0	0
MECP2	7795	-4.37374	1.2e-05	4.7e-05		PEX19	9663	10.3459	0	0
OPRL1	9173	-4.37391	1.2e-05	4.7e-05		RAB36	10721	10.3401	0	0
PRR22	10426	-4.37409	1.2e-05	4.7e-05		COG1	2687	10.3324	0	0
SPHK1	12640	-4.38028	1.2e-05	4.6e-05		AP2B1	648	10.329	0	0
TPTE	13909	-4.38138	1.2e-05	4.6e-05		NPHS1	8903	10.329	0	0
EDN3	3751	-4.38161	1.2e-05	4.6e-05		FAM149A	4251	10.3123	0	0
ARID3A	807	-4.38482	1.2e-05	4.5e-05		IL33	6049	10.3101	0	0
HERC2P2	5559	-4.38598	1.2e-05	4.5e-05		NPY1R	8928	10.3006	0	0
CEP57	2311	-4.38949	1.1e-05	4.4e-05		MUM1L1	8349	10.2812	0	0
MTDH	8286	-4.39045	1.1e-05	4.4e-05		MYADM	8367	10.2801	0	0
MCF2	7746	-4.39111	1.1e-05	4.4e-05		ALDH2	434	10.2727	0	0
ANKRD18B	558	-4.39181	1.1e-05	4.4e-05		ZNF831	15559	10.2658	0	0
DNAJC11	3493	-4.39221	1.1e-05	4.4e-05		RNF150	11199	10.264	0	0
HIST1H1C	5620	-4.39338	1.1e-05	4.4e-05		SKAP2	12004	10.2627	0	0
SIRT1	11993	-4.39366	1.1e-05	4.4e-05		SCGN	11643	10.2605	0	0
STON1	12899	-4.39526	1.1e-05	4.3e-05		PYGL	10659	10.2557	0	0
C19orf44	1506	-4.40215	1.1e-05	4.2e-05		KIF21B	6527	10.2446	0	0
KHDC4	6463	-4.40278	1.1e-05	4.2e-05		PTER	10548	10.2408	0	0
HLTF	5706	-4.40354	1.1e-05	4.2e-05		EFNB2	3793	10.2296	0	0
GNAS	5105	-4.404	1.1e-05	4.2e-05		GAP43	4881	10.2291	0	0
ANP32A-IT1	617	-4.40706	1e-05	4.1e-05		PRKCG	10353	10.2265	0	0
SAR1B	11578	-4.40732	1e-05	4.1e-05		PRR5	10432	10.2163	0	0
SUN1	12971	-4.40859	1e-05	4.1e-05		DYRK3	3701	10.2092	0	0
PRKAA1	10336	-4.40965	1e-05	4.1e-05		HMGCS1	5721	10.2082	0	0
CDC42SE1	2157	-4.40984	1e-05	4.1e-05		KCNG3	6360	10.2081	0	0
TRIM4	13994	-4.4106	1e-05	4.1e-05		ADCY7	250	10.2071	0	0
PPM1B	10195	-4.41064	1e-05	4.1e-05		COG5	2691	10.1883	0	0
ARIH1	813	-4.4113	1e-05	4e-05		MOB1B	8061	10.1879	0	0
DBF4	3166	-4.41146	1e-05	4e-05		ST6GALNAC5	12816	10.1572	0	0
GOLGA8IP	5153	-4.41298	1e-05	4e-05		EMG1	3935	10.144	0	0
ZNF396	15255	-4.41317	1e-05	4e-05		PSMB1	10485	10.1117	0	0
AVEN	1101	-4.41441	1e-05	4e-05		GNG2	5118	10.1078	0	0
LINC02012	7047	-4.41459	1e-05	4e-05		TRIM27	13984	10.1068	0	0
PCDHGB7	9494	-4.41556	1e-05	4e-05		GGCT	4979	10.1032	0	0
ZNF800	15543	-4.42072	1e-05	3.9e-05		SARNP	11582	10.0957	0	0
PTPRE	10599	-4.42206	1e-05	3.9e-05		SSSCA1	12787	10.0875	0	0
LEMD2	6850	-4.42223	1e-05	3.9e-05		NAV3	8528	10.0863	0	0
ABCC1	43	-4.42257	1e-05	3.9e-05		DOC2A	3546	10.0784	0	0
LOC400682	7258	-4.42257	1e-05	3.9e-05		POLR2L	10106	10.0706	0	0
PRICKLE1	10328	-4.4231	1e-05	3.8e-05		CACNA1H	1721	10.0539	0	0
POLG2	10082	-4.42336	1e-05	3.8e-05		AP3S1	656	10.0512	0	0
ALG6	456	-4.42661	1e-05	3.8e-05		PCED1B	9499	10.0383	0	0
ZNF17	15126	-4.42705	1e-05	3.8e-05		GSTM3	5361	10.0303	0	0
NAA50	8467	-4.42933	9e-06	3.7e-05		PPEF1	10166	10.0224	0	0
ST6GALNAC1	12813	-4.4315	9e-06	3.7e-05		SLC17A8	12051	10.0194	0	0
ATP10D	998	-4.43302	9e-06	3.7e-05		CHMP1A	2417	10.0189	0	0
STAM	12834	-4.43331	9e-06	3.7e-05		PRSS35	10455	10.0162	0	0
RIF1	11114	-4.43468	9e-06	3.7e-05		FAM171B	4275	9.98985	0	0
KLHL36	6606	-4.43721	9e-06	3.6e-05		KIRREL2	6551	9.98953	0	0
MYL12A	8398	-4.43949	9e-06	3.6e-05		MEIS3	7845	9.98878	0	0
ZNF805	15544	-4.4416	9e-06	3.6e-05		KLK5	6620	9.97862	0	0
SLC35C1	12183	-4.44235	9e-06	3.5e-05		CYB5D2	3077	9.97802	0	0
MROH6	8150	-4.44343	9e-06	3.5e-05		SH3BGRL3	11913	9.97555	0	0
WFIKKN1	14764	-4.44719	9e-06	3.5e-05		MTA3	8280	9.9599	0	0
ORAI2	9234	-4.44732	9e-06	3.5e-05		ZNF226	15159	9.95577	0	0
OXNAD1	9294	-4.44735	9e-06	3.5e-05		C1S	1531	9.92641	0	0
ERMP1	4076	-4.44805	9e-06	3.5e-05		RTN4RL2	11490	9.91103	0	0
NDUFAF2	8616	-4.44884	9e-06	3.4e-05		PTGER3	10552	9.90739	0	0
TAF1L	13100	-4.45197	9e-06	3.4e-05		TUBB8P12	14212	9.90568	0	0
ZNF565	15366	-4.45336	8e-06	3.4e-05		NKD2	8789	9.90061	0	0
LEMD3	6851	-4.45433	8e-06	3.4e-05		YPEL1	14873	9.89865	0	0
RRAD	11424	-4.45522	8e-06	3.4e-05		TMEM200A	13626	9.89771	0	0
OSBPL2	9252	-4.45639	8e-06	3.3e-05		LINC01485	7021	9.89746	0	0
PCNA	9514	-4.46065	8e-06	3.3e-05		CORO1A	2780	9.89261	0	0
PTPN4	10590	-4.46074	8e-06	3.3e-05		CMAS	2601	9.881	0	0
TMEM237	13652	-4.46282	8e-06	3.2e-05		RTP1	11491	9.87664	0	0
AKAP7	400	-4.46413	8e-06	3.2e-05		CPE	2815	9.87609	0	0
MTF1	8291	-4.4691	8e-06	3.2e-05		PNCK	10030	9.8642	0	0
WDR55	14729	-4.47031	8e-06	3.1e-05		PTPRA	10593	9.86404	0	0
PURB	10628	-4.47191	8e-06	3.1e-05		SLC26A11	12135	9.86373	0	0
USP49	14510	-4.47615	8e-06	3.1e-05		SEMA4F	11768	9.85721	0	0
CNKSR2	2630	-4.47647	8e-06	3.1e-05		TOM1L1	13829	9.84876	0	0
CEBPZ	2255	-4.47651	8e-06	3.1e-05		FBXO2	4473	9.83454	0	0
SLC15A4	12035	-4.47673	8e-06	3.1e-05		MAOB	7606	9.82595	0	0
PAWR	9425	-4.47712	8e-06	3.1e-05		NUDT14	9049	9.81669	0	0
EMCN	3931	-4.47772	8e-06	3e-05		CHST15	2458	9.80644	0	0
TFDP1	13338	-4.47964	7e-06	3e-05		GRIN3A	5315	9.78832	0	0
MRPL48	8191	-4.47967	7e-06	3e-05		MCTP1	7771	9.78251	0	0
INPP5A	6104	-4.48019	7e-06	3e-05		ATOH7	993	9.7656	0	0
FBXL22	4462	-4.48393	7e-06	3e-05		CCBE1	1897	9.76298	0	0
ZFY	15048	-4.4884	7e-06	2.9e-05		C2orf69	1596	9.75241	0	0
DEPDC1	3317	-4.48901	7e-06	2.9e-05		IL13RA2	6027	9.75191	0	0
ZNF586	15389	-4.48954	7e-06	2.9e-05		PTRH2	10615	9.74845	0	0
PAIP1	9348	-4.48993	7e-06	2.9e-05		LRRC3B	7406	9.74393	0	0
RNF157	11202	-4.49057	7e-06	2.9e-05		HSD11B1L	5823	9.73857	0	0
ELL	3892	-4.49184	7e-06	2.9e-05		PTPRF	10600	9.73155	0	0
ATXN7L1	1089	-4.49196	7e-06	2.9e-05		RGMB	11050	9.72852	0	0
LINC00652	6959	-4.49224	7e-06	2.9e-05		ACTG1	166	9.72542	0	0
ASIC1	922	-4.49237	7e-06	2.9e-05		F12	4169	9.71391	0	0
MZF1	8447	-4.49505	7e-06	2.8e-05		B4GALT2	1138	9.71097	0	0
SEPT7P2	11797	-4.49545	7e-06	2.8e-05		SPATC1L	12617	9.71092	0	0
RHOBTB2	11094	-4.49672	7e-06	2.8e-05		YWHAZ	14890	9.70125	0	0
POGK	10066	-4.49742	7e-06	2.8e-05		VSIG10L	14642	9.69957	0	0
ZCCHC7	14978	-4.49931	7e-06	2.8e-05		TMEM159	13582	9.69824	0	0
TNNC2	13803	-4.50045	7e-06	2.8e-05		ATP6V1C1	1056	9.6911	0	0
PLAGL2	9900	-4.50272	7e-06	2.7e-05		TCEA3	13233	9.68581	0	0
C7orf57	1656	-4.50323	7e-06	2.7e-05		C1QL1	1521	9.67964	0	0
ZBTB7A	14940	-4.5077	7e-06	2.7e-05		ADTRP	305	9.66061	0	0
RAI1	10791	-4.50785	7e-06	2.7e-05		MYL12B	8399	9.64803	0	0
MIS18A	8001	-4.50792	7e-06	2.7e-05		WDR86	14747	9.64665	0	0
LOC646626	7298	-4.50895	7e-06	2.7e-05		RILPL2	11118	9.6406	0	0
XIRP1	14817	-4.50914	7e-06	2.7e-05		SPON2	12666	9.63728	0	0
TAS2R4	13150	-4.50953	6e-06	2.7e-05		PPM1M	10204	9.63496	0	0
PKN2	9874	-4.51125	6e-06	2.6e-05		C1orf50	1554	9.62625	0	0
FAM133CP	4241	-4.51212	6e-06	2.6e-05		BCR	1241	9.62478	0	0
FLT1	4636	-4.51358	6e-06	2.6e-05		THRA	13400	9.62149	0	0
RNF180	11210	-4.51506	6e-06	2.6e-05		CNIH2	2627	9.61798	0	0
FCHO2	4517	-4.51576	6e-06	2.6e-05		BRWD1	1378	9.60853	0	0
GUSBP10	5413	-4.51673	6e-06	2.6e-05		NSFL1C	8991	9.59517	0	0
HUNK	5886	-4.51698	6e-06	2.6e-05		GMFG	5086	9.57976	0	0
RAMP3	10807	-4.52273	6e-06	2.5e-05		SLC7A4	12282	9.5727	0	0
ZNF652	15432	-4.52345	6e-06	2.5e-05		IGF1	5984	9.56061	0	0
TAF11	13092	-4.5241	6e-06	2.5e-05		DGKB	3342	9.55129	0	0
PACSIN2	9337	-4.52807	6e-06	2.4e-05		PAMR1	9365	9.52221	0	0
ZNF224	15157	-4.52815	6e-06	2.4e-05		GDF10	4939	9.51176	0	0
JAKMIP2	6267	-4.52885	6e-06	2.4e-05		CCDC189	1951	9.51118	0	0
ENKD1	3963	-4.52966	6e-06	2.4e-05		ANKRD6	598	9.505	0	0
PDAP1	9541	-4.53244	6e-06	2.4e-05		PNPLA3	10050	9.50322	0	0
MPC1	8096	-4.53252	6e-06	2.4e-05		HTR7	5880	9.49428	0	0
SORBS1	12540	-4.53361	6e-06	2.4e-05		AP3M2	655	9.49159	0	0
KIAA1551	6503	-4.53574	6e-06	2.4e-05		MTCH1	8283	9.4836	0	0
ARHGEF33	797	-4.53702	6e-06	2.4e-05		GNB4	5111	9.47538	0	0
ABHD17A	71	-4.53791	6e-06	2.3e-05		SYNPR	13043	9.47378	0	0
TMEM39A	13687	-4.53832	6e-06	2.3e-05		ADCY2	245	9.47364	0	0
RPP38	11362	-4.53924	6e-06	2.3e-05		HSPB3	5860	9.46487	0	0
ZNF292	15205	-4.54257	6e-06	2.3e-05		PPP5D1	10275	9.45886	0	0
KCNN4	6402	-4.54293	6e-06	2.3e-05		SLC26A4	12137	9.45794	0	0
ADAM15	203	-4.54417	6e-06	2.3e-05		PTHLH	10565	9.44606	0	0
HSD11B1	5822	-4.54541	5e-06	2.3e-05		FAM162A	4263	9.4192	0	0
LRRC45	7411	-4.54591	5e-06	2.3e-05		FGGY	4571	9.41546	0	0
RALGPS1	10801	-4.54862	5e-06	2.2e-05		CDH9	2186	9.40989	0	0
AK1	383	-4.54961	5e-06	2.2e-05		TMEM54	13702	9.40175	0	0
TMSB15A	13753	-4.55077	5e-06	2.2e-05		CDH10	2168	9.39204	0	0
CMKLR1	2607	-4.55178	5e-06	2.2e-05		CA10	1687	9.37784	0	0
LINC00965	6984	-4.55323	5e-06	2.2e-05		RRP7A	11444	9.3752	0	0
SEC31B	11730	-4.55537	5e-06	2.2e-05		SHISA9	11950	9.37174	0	0
KIF5B	6541	-4.55796	5e-06	2.1e-05		MCUB	7774	9.3648	0	0
NUP160	9075	-4.55806	5e-06	2.1e-05		LINC00461	6937	9.35069	0	0
ZNRF2P1	15589	-4.56385	5e-06	2.1e-05		LINC02217	7053	9.34773	0	0
ZMYM4	15087	-4.56573	5e-06	2.1e-05		WFDC1	14757	9.34582	0	0
RALGAPA1	10797	-4.56722	5e-06	2.1e-05		SCN9A	11658	9.32627	0	0
NAXD	8529	-4.56771	5e-06	2e-05		TSPAN33	14109	9.32499	0	0
MDC1	7776	-4.56898	5e-06	2e-05		FABP7	4188	9.31177	0	0
FAM104B	4207	-4.56953	5e-06	2e-05		GRIA1	5299	9.30922	0	0
BAZ1B	1182	-4.57095	5e-06	2e-05		STX17-AS1	12923	9.3066	0	0
PPP2R2D	10254	-4.57322	5e-06	2e-05		ALKAL2	461	9.30157	0	0
FAM43B	4355	-4.57477	5e-06	2e-05		CAP1	1791	9.29462	0	0
PATL1	9423	-4.57486	5e-06	2e-05		STOML1	12897	9.29317	0	0
BCL11A	1217	-4.57491	5e-06	2e-05		C2orf80	1602	9.29085	0	0
MCM8	7762	-4.57764	5e-06	2e-05		LMO3	7093	9.2875	0	0
TRPT1	14066	-4.57923	5e-06	1.9e-05		SOX9-AS1	12574	9.2873	0	0
TOP1P2	13845	-4.58375	5e-06	1.9e-05		CNR1	2657	9.28665	0	0
ZNF490	15313	-4.58375	5e-06	1.9e-05		FREM3	4720	9.28058	0	0
ANKRD36B	582	-4.58841	4e-06	1.9e-05		STYK1	12942	9.2736	0	0
REL	10987	-4.58915	4e-06	1.9e-05		LOC285097	7241	9.26475	0	0
PMAIP1	10008	-4.58916	4e-06	1.9e-05		CYB5R1	3078	9.2612	0	0
NXF1	9100	-4.58975	4e-06	1.9e-05		SERTM1	11830	9.24657	0	0
LOC100240734	7132	-4.58981	4e-06	1.9e-05		HBQ1	5485	9.24651	0	0
C3orf35	1612	-4.59396	4e-06	1.8e-05		KLHDC8B	6584	9.24332	0	0
ZKSCAN3	15071	-4.59427	4e-06	1.8e-05		NADK2	8483	9.23935	0	0
MARK3	7695	-4.59437	4e-06	1.8e-05		JPT1	6292	9.23448	0	0
LYPLA1	7514	-4.59618	4e-06	1.8e-05		HRASLS	5801	9.23432	0	0
GJC1	5029	-4.5986	4e-06	1.8e-05		CCKBR	2009	9.23262	0	0
HEATR3	5531	-4.5988	4e-06	1.8e-05		PCDH17	9462	9.23013	0	0
MPHOSPH10	8102	-4.59926	4e-06	1.8e-05		THTPA	13406	9.22107	0	0
CHGA	2407	-4.60005	4e-06	1.8e-05		PGM2L1	9706	9.21662	0	0
GK3P	5033	-4.60091	4e-06	1.8e-05		EPOP	4030	9.2025	0	0
CS	2924	-4.60165	4e-06	1.8e-05		TDRD9	13285	9.20167	0	0
ANP32D	621	-4.60437	4e-06	1.7e-05		ETNPPL	4110	9.20009	0	0
METTL18	7868	-4.60443	4e-06	1.7e-05		PRMT6	10379	9.19942	0	0
CCDC39	1962	-4.60482	4e-06	1.7e-05		LINC02482	7058	9.19704	0	0
EMBP1	3920	-4.60595	4e-06	1.7e-05		AHRR	365	9.19236	0	0
LINC01578	7028	-4.60663	4e-06	1.7e-05		RASAL1	10850	9.19121	0	0
TMEM223	13643	-4.60774	4e-06	1.7e-05		ZSCAN18	15601	9.18826	0	0
GFRA2	4971	-4.60997	4e-06	1.7e-05		MYH7	8395	9.17896	0	0
DDX39A	3264	-4.61092	4e-06	1.7e-05		UNC5B-AS1	14419	9.17866	0	0
KCNA3	6341	-4.61098	4e-06	1.7e-05		PLPPR4	9988	9.17533	0	0
PELI3	9641	-4.61259	4e-06	1.7e-05		DNAJC2	3502	9.16971	0	0
BAZ2A	1183	-4.61273	4e-06	1.7e-05		ME1	7789	9.15059	0	0
VSIG10	14641	-4.61336	4e-06	1.7e-05		B9D1	1145	9.14976	0	0
FRG1JP	4723	-4.61549	4e-06	1.7e-05		TNFRSF11A	13778	9.13894	0	0
KIAA2026	6512	-4.61622	4e-06	1.7e-05		PSD3	10471	9.13439	0	0
TBC1D3P5	13190	-4.61795	4e-06	1.6e-05		MYL5	8401	9.13431	0	0
SMYD4	12422	-4.61821	4e-06	1.6e-05		ACOT8	136	9.13381	0	0
HSD17B11	5827	-4.62255	4e-06	1.6e-05		VAT1L	14558	9.13237	0	0
NCAPD2	8548	-4.62486	4e-06	1.6e-05		CFD	2358	9.13003	0	0
JMY	6286	-4.62587	4e-06	1.6e-05		MYB	8370	9.12801	0	0
HIVEP3	5676	-4.62771	4e-06	1.6e-05		CPNE7	2831	9.12716	0	0
FGF14	4552	-4.62878	4e-06	1.6e-05		TMEM150C	13577	9.12557	0	0
ZNF653	15433	-4.62958	4e-06	1.6e-05		PLCB2	9908	9.11883	0	0
MRPL34	8176	-4.62972	4e-06	1.6e-05		BATF3	1179	9.11237	0	0
DGLUCY	3350	-4.63138	4e-06	1.5e-05		SLC35F2	12191	9.11057	0	0
KIZ	6557	-4.63187	4e-06	1.5e-05		LOC728392	7305	9.10849	0	0
SLC35G5	12197	-4.63217	4e-06	1.5e-05		GLRA3	5062	9.09966	0	0
TIAM2	13415	-4.6322	4e-06	1.5e-05		CHL1	2414	9.09691	0	0
GPR85	5264	-4.63224	4e-06	1.5e-05		DPF1	3575	9.08622	0	0
MGA	7917	-4.63965	3e-06	1.5e-05		AMIGO2	498	9.0846	0	0
GRIN2A	5311	-4.63969	3e-06	1.5e-05		LOXL1	7336	9.06831	0	0
USP15	14474	-4.64045	3e-06	1.5e-05		NUDT10	9046	9.06172	0	0
COIL	2695	-4.6405	3e-06	1.5e-05		CFAP52	2347	9.06131	0	0
RBFOX3	10894	-4.64168	3e-06	1.5e-05		CCT5	2063	9.05034	0	0
CLN6	2573	-4.64562	3e-06	1.5e-05		CENPF	2275	9.04657	0	0
EMX1	3950	-4.64705	3e-06	1.4e-05		SCPEP1	11666	9.03947	0	0
DZANK1	3705	-4.64823	3e-06	1.4e-05		STUM	12918	9.02171	0	0
ISY1	6204	-4.64991	3e-06	1.4e-05		LRRC2	7389	9.01228	0	0
ASAP1-IT1	894	-4.65045	3e-06	1.4e-05		DNAH14	3471	9.01044	0	0
PACSIN3	9338	-4.65206	3e-06	1.4e-05		CAMK1G	1769	8.99263	0	0
SEC24B	11725	-4.65236	3e-06	1.4e-05		SIL1	11980	8.99	0	0
SLC6A15	12269	-4.65239	3e-06	1.4e-05		TMEM130	13555	8.98439	0	0
COQ3	2772	-4.65376	3e-06	1.4e-05		ARL15	820	8.96805	0	0
KALRN	6303	-4.65588	3e-06	1.4e-05		NDUFC2	8637	8.96769	0	0
CD274	2090	-4.65975	3e-06	1.4e-05		STARD3NL	12843	8.96704	0	0
YTHDC1	14879	-4.65996	3e-06	1.4e-05		HPCAL4	5785	8.96083	0	0
SLC22A23	12073	-4.66129	3e-06	1.4e-05		GLOD4	5059	8.95896	0	0
LIN28B	6911	-4.66819	3e-06	1.3e-05		DOC2B	3547	8.94875	0	0
FIZ1	4596	-4.67069	3e-06	1.3e-05		BFSP1	1269	8.93516	0	0
ANO6	612	-4.67207	3e-06	1.3e-05		WIF1	14771	8.90898	0	0
EOGT	3990	-4.6721	3e-06	1.3e-05		ACTR1A	177	8.90361	0	0
SUZ12	12994	-4.67269	3e-06	1.3e-05		MIR7-3HG	7995	8.90276	0	0
HYLS1	5897	-4.67644	3e-06	1.3e-05		CPNE6	2830	8.90098	0	0
HSPB6	5861	-4.6768	3e-06	1.3e-05		MANEAL	7602	8.88957	0	0
SPOCD1	12661	-4.67708	3e-06	1.3e-05		SMAD3	12337	8.88652	0	0
SNCAIP	12439	-4.67911	3e-06	1.2e-05		PCSK5	9531	8.88545	0	0
MYLK2	8408	-4.67944	3e-06	1.2e-05		CMSS1	2610	8.88166	0	0
PNISR	10031	-4.68059	3e-06	1.2e-05		MAGED1	7561	8.8788	0	0
SUPV3L1	12981	-4.68078	3e-06	1.2e-05		SLC16A2	12040	8.87742	0	0
PCTP	9535	-4.68677	3e-06	1.2e-05		LSM3	7462	8.85554	0	0
RUNX2	11505	-4.68694	3e-06	1.2e-05		ACOT2	133	8.84932	0	0
ADAM8	214	-4.69228	3e-06	1.2e-05		SCARA5	11622	8.84516	0	0
STH	12865	-4.69344	3e-06	1.2e-05		APOPT1	704	8.8328	0	0
ROCK2	11264	-4.69511	3e-06	1.2e-05		LDHA	6837	8.83171	0	0
DGCR9	3340	-4.6952	3e-06	1.2e-05		TMEM196	13622	8.82789	0	0
GPR137C	5220	-4.69598	3e-06	1.2e-05		MAFG	7555	8.82707	0	0
ZNF547	15351	-4.69628	3e-06	1.2e-05		ARHGAP28	762	8.82088	0	0
PTPRT	10611	-4.69951	3e-06	1.1e-05		RSU1	11469	8.80686	0	0
SLC20A2	12066	-4.70086	3e-06	1.1e-05		CIB1	2477	8.79788	0	0
MYC	8379	-4.70162	3e-06	1.1e-05		SHISA5	11946	8.79335	0	0
CCDC61	1972	-4.70186	3e-06	1.1e-05		RBM8A	10931	8.78602	0	0
RFPL2	11030	-4.7051	3e-06	1.1e-05		LYRM9	7521	8.78378	0	0
FNBP4	4658	-4.70745	3e-06	1.1e-05		TMEFF2	13527	8.77772	0	0
EPN3	4029	-4.7085	2e-06	1.1e-05		MKL2	8009	8.77505	0	0
DTX2P1-UPK3BP1-PMS2P11	3645	-4.70926	2e-06	1.1e-05		RSPH9	11461	8.76863	0	0
BCDIN3D	1211	-4.70979	2e-06	1.1e-05		IL12RB2	6025	8.75023	0	0
IMPA1	6071	-4.7107	2e-06	1.1e-05		LINC00260	6926	8.74619	0	0
KIDINS220	6513	-4.71438	2e-06	1.1e-05		DNAJA1	3476	8.74347	0	0
FANCC	4410	-4.71772	2e-06	1e-05		PCDH19	9464	8.74106	0	0
CNOT1	2640	-4.71788	2e-06	1e-05		VSTM2L	14650	8.7357	0	0
PIBF1	9779	-4.72066	2e-06	1e-05		GLRA2	5061	8.7317	0	0
RSBN1L	11452	-4.7213	2e-06	1e-05		CELF5	2265	8.72731	0	0
TMEM14C	13574	-4.72248	2e-06	1e-05		NANOS1	8498	8.72569	0	0
CYB561D1	3072	-4.72255	2e-06	1e-05		KLK10	6614	8.72069	0	0
MRPS31	8223	-4.72387	2e-06	1e-05		SIRPA	11990	8.71905	0	0
SLC38A3	12208	-4.72409	2e-06	1e-05		FILIP1	4590	8.71846	0	0
DDX23	3258	-4.72485	2e-06	1e-05		S100A13	11528	8.71267	0	0
DUSP8	3675	-4.72838	2e-06	1e-05		GGTA1P	4992	8.69718	0	0
NAT8L	8524	-4.72971	2e-06	1e-05		PUSL1	10634	8.69482	0	0
GNG7	5122	-4.73033	2e-06	1e-05		ROBO1	11258	8.68993	0	0
KIAA1217	6494	-4.732	2e-06	1e-05		CGREF1	2372	8.68916	0	0
SPTBN4	12699	-4.73345	2e-06	1e-05		BYSL	1422	8.6822	0	0
RPAP2	11282	-4.73358	2e-06	1e-05		GUCY1A1	5406	8.67658	0	0
CCDC91	1998	-4.73565	2e-06	1e-05		TAMM41	13119	8.66518	0	0
SYT15	13055	-4.73613	2e-06	1e-05		CNTN1	2663	8.65471	0	0
LEPROTL1	6858	-4.73669	2e-06	1e-05		NKAIN4	8784	8.61754	0	0
PRKCB	10350	-4.73737	2e-06	1e-05		SERP1	11808	8.61248	0	0
PEG3	9637	-4.73815	2e-06	1e-05		NLE1	8805	8.60946	0	0
KIF4B	6539	-4.73893	2e-06	1e-05		HPCAL1	5784	8.59795	0	0
CCT6P3	2067	-4.7395	2e-06	9e-06		TMEM164	13588	8.58358	0	0
IRF3	6177	-4.74057	2e-06	9e-06		E2F3	3709	8.57731	0	0
MRGBP	8136	-4.74116	2e-06	9e-06		UCHL1	14369	8.57621	0	0
RCL1	10959	-4.74153	2e-06	9e-06		MPV17L2	8124	8.57554	0	0
THADA	13367	-4.74163	2e-06	9e-06		BCKDK	1215	8.57099	0	0
BTN2A1	1408	-4.74295	2e-06	9e-06		PSMB7	10492	8.5641	0	0
PMS2P4	10025	-4.74582	2e-06	9e-06		CTC1	2978	8.55902	0	0
RP9P	11275	-4.74591	2e-06	9e-06		HTR1A	5871	8.55481	0	0
ABCA5	32	-4.74704	2e-06	9e-06		OPRK1	9172	8.55435	0	0
CIT	2496	-4.75484	2e-06	9e-06		FAM102B	4204	8.54473	0	0
HELLS	5547	-4.75676	2e-06	9e-06		VIT	14591	8.53887	0	0
KRT8	6678	-4.75977	2e-06	9e-06		TXNL4A	14253	8.53517	0	0
GPLD1	5205	-4.76248	2e-06	9e-06		GPR150	5226	8.533	0	0
EPM2AIP1	4026	-4.76266	2e-06	9e-06		PEX10	9655	8.53268	0	0
ITPRIPL1	6247	-4.76839	2e-06	8e-06		GNAQ	5104	8.52192	0	0
CCDC126	1915	-4.77044	2e-06	8e-06		RGS4	11069	8.52143	0	0
CFAP65	2350	-4.77186	2e-06	8e-06		DACH2	3143	8.51667	0	0
ZNF136	15110	-4.77451	2e-06	8e-06		CYP46A1	3113	8.50238	0	0
CLASRP	2514	-4.77661	2e-06	8e-06		ZCCHC12	14969	8.49583	0	0
KRTAP9-4	6731	-4.7774	2e-06	8e-06		HSPB11	5858	8.49467	0	0
DAZAP1	3163	-4.77854	2e-06	8e-06		CLEC4G	2548	8.48846	0	0
HRC	5803	-4.78155	2e-06	8e-06		SH2D5	11908	8.48512	0	0
LOC441155	7275	-4.78555	2e-06	8e-06		NFKBIE	8731	8.47862	0	0
SLC33A1	12172	-4.78659	2e-06	8e-06		TG	13351	8.47228	0	0
PTTG2	10620	-4.78764	2e-06	8e-06		CABYR	1711	8.46925	0	0
KPNA5	6650	-4.78888	2e-06	8e-06		KPNA2	6647	8.45798	0	0
IFNAR2	5960	-4.78983	2e-06	7e-06		KCNK2	6389	8.45712	0	0
CITED2	2498	-4.79281	2e-06	7e-06		PSORS1C1	10526	8.4544	0	0
MCM3	7755	-4.79338	2e-06	7e-06		METTL1	7862	8.45275	0	0
GALNT3	4867	-4.79479	2e-06	7e-06		C6orf52	1646	8.44133	0	0
SLCO4A1	12308	-4.79484	2e-06	7e-06		SFTPD	11877	8.43778	0	0
GOLGA8A	5152	-4.79682	2e-06	7e-06		RAB3C	10727	8.43587	0	0
RBM33	10917	-4.79704	2e-06	7e-06		RIPK2	11138	8.43303	0	0
MAP3K14	7627	-4.79819	2e-06	7e-06		PLAC9	9896	8.42951	0	0
DNMT3A	3540	-4.79859	2e-06	7e-06		SYN2	13021	8.42831	0	0
ATP5MPL	1035	-4.79862	2e-06	7e-06		WFS1	14766	8.4262	0	0
RAB11FIP3	10693	-4.80099	2e-06	7e-06		PRAF2	10290	8.42559	0	0
DENND4B	3310	-4.80226	2e-06	7e-06		CHRDL1	2438	8.42386	0	0
NUDT8	9063	-4.80365	2e-06	7e-06		FDPS	4522	8.41853	0	0
ALG2	453	-4.80419	2e-06	7e-06		KCNG1	6359	8.41598	0	0
PPFIA4	10170	-4.8043	2e-06	7e-06		DYRK2	3700	8.39949	0	0
MVB12A	8354	-4.80433	2e-06	7e-06		SLC22A18	12071	8.39702	0	0
KCTD3	6429	-4.8045	2e-06	7e-06		CHMP4A	2421	8.39475	0	0
CPNE9	2833	-4.80918	2e-06	7e-06		UBE2Z	14329	8.38978	0	0
TP53AIP1	13862	-4.80933	2e-06	7e-06		PDGFC	9582	8.38849	0	0
RPIA	11292	-4.80941	2e-06	7e-06		PRKAA2	10337	8.3858	0	0
NAGPA	8490	-4.81146	1e-06	7e-06		CDH8	2185	8.38158	0	0
PLPP7	9984	-4.81226	1e-06	7e-06		PDE2A	9561	8.37574	0	0
RHOBTB1	11093	-4.8136	1e-06	7e-06		RER1	11000	8.37289	0	0
TAZ	13162	-4.81756	1e-06	7e-06		DIAPH3	3394	8.37209	0	0
ANKRD20A8P	567	-4.8178	1e-06	7e-06		PLXNA1	9998	8.36848	0	0
LINC00963	6983	-4.81852	1e-06	7e-06		HSP90B1	5843	8.36821	0	0
LOC653080	7301	-4.8186	1e-06	7e-06		YJEFN3	14868	8.35858	0	0
LRRFIP1	7437	-4.81899	1e-06	7e-06		NOL4	8851	8.35257	0	0
NOM1	8858	-4.8201	1e-06	7e-06		PDE1A	9558	8.34757	0	0
EGFR-AS1	3802	-4.82084	1e-06	7e-06		ADGRL3	271	8.33891	0	0
PHF8	9739	-4.82096	1e-06	7e-06		SIDT1	11969	8.33318	0	0
BRAF	1347	-4.82116	1e-06	7e-06		TLN2	13476	8.33158	0	0
CNFN	2624	-4.82355	1e-06	6e-06		RASGEF1C	10857	8.32768	0	0
RNF212	11221	-4.82569	1e-06	6e-06		SLC25A23	12101	8.3238	0	0
DOK3	3561	-4.82947	1e-06	6e-06		MCUR1	7775	8.32172	0	0
IKBKB	6016	-4.83113	1e-06	6e-06		ST6GALNAC6	12817	8.31967	0	0
LIN7A	6916	-4.83524	1e-06	6e-06		TMEM108	13536	8.31915	0	0
NEAT1	8649	-4.83643	1e-06	6e-06		SST	12789	8.31113	0	0
GMPR	5091	-4.83695	1e-06	6e-06		CHST1	2452	8.30716	0	0
GGT1	4986	-4.83726	1e-06	6e-06		ERFE	4056	8.30649	0	0
ZNF44	15283	-4.83988	1e-06	6e-06		MRC1	8131	8.29617	0	0
PCBP2	9451	-4.84002	1e-06	6e-06		VPS35	14619	8.28674	0	0
HCN1	5498	-4.8422	1e-06	6e-06		SPATA33	12611	8.28494	0	0
KCTD9	6435	-4.84221	1e-06	6e-06		TMEM176B	13602	8.28343	0	0
PDE4DIPP1	9569	-4.84573	1e-06	6e-06		RAB35	10720	8.28269	0	0
ANKFY1	540	-4.84691	1e-06	6e-06		CCDC68	1975	8.27593	0	0
POU3F4	10148	-4.84848	1e-06	6e-06		GPR68	5260	8.27503	0	0
ACTN4	175	-4.84871	1e-06	6e-06		MT1B	8268	8.27236	0	0
RBM39	10920	-4.85013	1e-06	6e-06		LYPD1	7508	8.27059	0	0
CCNI2	2038	-4.85256	1e-06	6e-06		GATB	4905	8.26813	0	0
NBPF3	8541	-4.85305	1e-06	6e-06		PTGER4	10553	8.26709	0	0
TFB2M	13336	-4.85477	1e-06	6e-06		NPTXR	8925	8.26684	0	0
PTPRCAP	10596	-4.85661	1e-06	6e-06		MT1JP	8272	8.25965	0	0
LOC100287497	7137	-4.85906	1e-06	5e-06		PYCR1	10654	8.24351	0	0
GEMIN5	4955	-4.8594	1e-06	5e-06		NPTX2	8924	8.23717	0	0
ST7L	12820	-4.86	1e-06	5e-06		RIOX2	11136	8.23563	0	0
PPIG	10184	-4.86053	1e-06	5e-06		ME3	7791	8.23214	0	0
KLRA1P	6627	-4.86193	1e-06	5e-06		AK5	387	8.23149	0	0
PPP2R2B	10252	-4.86206	1e-06	5e-06		ANOS1	615	8.22843	0	0
CGN	2370	-4.86277	1e-06	5e-06		TXLNB	14240	8.22576	0	0
EEF1AKMT2	3760	-4.86305	1e-06	5e-06		NTNG2	9027	8.22268	0	0
HSPBAP1	5864	-4.86346	1e-06	5e-06		SUSD1	12986	8.21644	0	0
LPIN2	7349	-4.86968	1e-06	5e-06		SPRN	12679	8.20425	0	0
MAP3K21	7631	-4.87181	1e-06	5e-06		KLHL35	6605	8.20072	0	0
KLHL11	6587	-4.87548	1e-06	5e-06		RPL27A	11324	8.19811	0	0
PPARGC1B	10160	-4.8795	1e-06	5e-06		AMN1	503	8.19343	0	0
RCN3	10962	-4.87986	1e-06	5e-06		PPP1R32	10233	8.18299	0	0
CBLB	1872	-4.88013	1e-06	5e-06		PNMT	10043	8.18217	0	0
OGDHL	9139	-4.88029	1e-06	5e-06		SELENOW	11754	8.18106	0	0
ARNT	855	-4.88755	1e-06	5e-06		LAMA1	6757	8.18045	0	0
MFHAS1	7895	-4.88794	1e-06	5e-06		VPS37D	14624	8.17913	0	0
LOC729737	7319	-4.88987	1e-06	5e-06		SRP19	12734	8.17863	0	0
NUP107	9071	-4.89101	1e-06	5e-06		CDC42	2148	8.16874	0	0
FAM118A	4222	-4.89127	1e-06	5e-06		ZNF436	15279	8.16825	0	0
SMG9	12376	-4.89245	1e-06	5e-06		CDKN2D	2231	8.16616	0	0
TRAK2	13936	-4.89259	1e-06	5e-06		NR4A3	8952	8.16022	0	0
SETD2	11839	-4.89345	1e-06	5e-06		KLHL25	6597	8.15988	0	0
NFYC	8741	-4.89546	1e-06	5e-06		TMEM256	13669	8.15643	0	0
SPRTN	12683	-4.89649	1e-06	5e-06		RASL11B	10868	8.13788	0	0
ZNF660	15438	-4.89698	1e-06	5e-06		EXOC6	4139	8.13729	0	0
HPS5	5796	-4.89908	1e-06	5e-06		TMSB4X	13755	8.13682	0	0
TAF5L	13106	-4.90004	1e-06	4e-06		HSBP1	5819	8.13307	0	0
GABPA	4821	-4.90071	1e-06	4e-06		CALML3	1760	8.13147	0	0
SERAC1	11800	-4.90232	1e-06	4e-06		FOLR2	4673	8.12842	0	0
ANKRD36BP1	583	-4.90252	1e-06	4e-06		DZIP3	3707	8.12368	0	0
HAUS4	5472	-4.90276	1e-06	4e-06		TMEM208	13633	8.12125	0	0
PVR	10636	-4.90365	1e-06	4e-06		IL17D	6030	8.11243	0	0
GSAP	5341	-4.90448	1e-06	4e-06		LY86-AS1	7500	8.1114	0	0
ZC3H6	14959	-4.90728	1e-06	4e-06		ASS1	941	8.10979	0	0
CDYL	2244	-4.90785	1e-06	4e-06		PSMB2	10487	8.10756	0	0
ZNF317	15211	-4.90935	1e-06	4e-06		SPICE1	12645	8.10511	0	0
ZSWIM5	15618	-4.90952	1e-06	4e-06		PPDPF	10165	8.09641	0	0
SLC12A6	12026	-4.91101	1e-06	4e-06		ARHGDIG	780	8.09543	0	0
TNFAIP8	13772	-4.91131	1e-06	4e-06		ZNF350	15236	8.09029	0	0
ZKSCAN4	15072	-4.9138	1e-06	4e-06		VPS29	14616	8.08637	0	0
GIN1	5014	-4.91523	1e-06	4e-06		AKR7A2	413	8.08357	0	0
WASHC2A	14677	-4.91929	1e-06	4e-06		MYDGF	8387	8.06622	0	0
PLEKHM1P1	9954	-4.92003	1e-06	4e-06		RBBP7	10887	8.06488	0	0
ALG10B	447	-4.93137	1e-06	4e-06		KLF8	6575	8.06186	0	0
IL7R	6056	-4.93261	1e-06	4e-06		SNCG	12441	8.05808	0	0
TNF	13768	-4.93419	1e-06	4e-06		LOC101927752	7179	8.0568	0	0
ZNF445	15289	-4.93669	1e-06	4e-06		MT1A	8267	8.05646	0	0
ZNF230	15163	-4.93807	1e-06	4e-06		CDO1	2233	8.05504	0	0
ATXN7L2	1090	-4.93931	1e-06	4e-06		MT1L	8273	8.04738	0	0
RAD52	10781	-4.93973	1e-06	4e-06		CCNYL1	2048	8.04537	0	0
PDPN	9609	-4.94194	1e-06	4e-06		ANKRD30B	575	8.03989	0	0
MBNL2	7730	-4.94336	1e-06	4e-06		MORN4	8088	8.03712	0	0
FLRT3	4635	-4.94652	1e-06	4e-06		PIANP	9774	8.03026	0	0
ZNF774	15522	-4.94721	1e-06	4e-06		CD6	2115	8.02544	0	0
GPR61	5257	-4.95172	1e-06	4e-06		MT1E	8269	8.02319	0	0
EEF1D	3764	-4.95174	1e-06	4e-06		UBL5	14340	8.01511	0	0
SPART	12600	-4.95297	1e-06	3e-06		TMEM176A	13601	8.0131	0	0
GPR180	5240	-4.95316	1e-06	3e-06		WSB2	14799	8.01035	0	0
ODF2	9132	-4.95371	1e-06	3e-06		TBCA	13197	8.0102	0	0
MLLT10	8027	-4.95385	1e-06	3e-06		SLC9A6	12298	8.01012	0	0
PPL	10193	-4.95426	1e-06	3e-06		CAPZB	1811	8.00784	0	0
TMEM19	13619	-4.95577	1e-06	3e-06		RGS14	11060	8.00116	0	0
PRH2	10327	-4.95602	1e-06	3e-06		LSM4	7463	8.00091	0	0
PPP2R5D	10261	-4.95652	1e-06	3e-06		LOC441666	7280	8.00033	0	0
PDIA5	9594	-4.95891	1e-06	3e-06		NWD2	9099	7.99288	0	0
MICU3	7956	-4.96175	1e-06	3e-06		HES4	5568	7.9919	0	0
TECTA	13293	-4.96311	1e-06	3e-06		ACSL4	153	7.98921	0	0
NTNG1	9026	-4.96592	1e-06	3e-06		PYCR3	10656	7.98538	0	0
MNS1	8056	-4.96988	1e-06	3e-06		PNPLA4	10051	7.9764	0	0
SLC2A6	12160	-4.97621	1e-06	3e-06		HILS1	5606	7.97415	0	0
LOC101928087	7184	-4.97802	1e-06	3e-06		ZCCHC18	14972	7.96277	0	0
NOP2	8865	-4.97863	1e-06	3e-06		SUMF1	12965	7.94903	0	0
SLC25A19	12097	-4.97867	1e-06	3e-06		NBDY	8532	7.94495	0	0
TTLL5	14182	-4.98001	1e-06	3e-06		ICAM5	5910	7.94126	0	0
GPR19	5243	-4.9803	1e-06	3e-06		SUB1	12945	7.93701	0	0
GK	5032	-4.98212	1e-06	3e-06		B3GNT2	1127	7.90749	0	0
SEMA3E	11762	-4.98343	1e-06	3e-06		A1BG-AS1	2	7.90163	0	0
MINDY3	7977	-4.98415	1e-06	3e-06		KCTD15	6422	7.90163	0	0
HEATR1	5530	-4.98615	1e-06	3e-06		GABRB3	4833	7.89952	0	0
CCDC138	1921	-4.9878	1e-06	3e-06		ARMCX1	848	7.89702	0	0
SPECC1L	12630	-4.99125	1e-06	3e-06		EDNRB	3753	7.89344	0	0
MAML3	7586	-4.99137	1e-06	3e-06		BHMT2	1276	7.89286	0	0
TENM4	13306	-4.9935	1e-06	3e-06		ADRA2C	298	7.89261	0	0
LINC00265	6927	-4.99384	1e-06	3e-06		GCNT1	4930	7.88549	0	0
TNRC6A	13814	-4.9941	1e-06	3e-06		TRIP12	14023	7.88197	0	0
NIPAL2	8770	-4.9944	1e-06	3e-06		JPH3	6290	7.88141	0	0
MRNIP	8146	-4.99543	1e-06	3e-06		MT2A	8276	7.87005	0	0
KLHL15	6590	-4.99624	1e-06	3e-06		GNPTAB	5133	7.86979	0	0
RAD54L2	10784	-4.99784	1e-06	3e-06		GPM6A	5206	7.86573	0	0
LINC01405	7017	-5.00029	1e-06	3e-06		DKK3	3421	7.86483	0	0
MXD4	8363	-5.00246	1e-06	3e-06		ZBTB44	14933	7.86296	0	0
TET1	13318	-5.00271	1e-06	3e-06		MT1G	8271	7.85673	0	0
SLC36A1	12199	-5.00534	1e-06	3e-06		MAST3	7704	7.85567	0	0
LOC100129917	7116	-5.00899	1e-06	3e-06		FAM86C1	4386	7.84476	0	0
HAUS1	5469	-5.00945	1e-06	3e-06		CCNH	2036	7.83493	0	0
RACGAP1	10768	-5.0102	1e-06	3e-06		EFEMP1	3778	7.83314	0	0
NAT9	8525	-5.01035	1e-06	3e-06		TMEM120A	13544	7.83036	0	0
PCDHGA7	9491	-5.01062	1e-06	3e-06		CD53	2111	7.82462	0	0
TMEM265	13674	-5.01374	1e-06	3e-06		GULP1	5411	7.8216	0	0
CEND1	2270	-5.01406	1e-06	3e-06		CCNL2	2042	7.81802	0	0
ATG4A	979	-5.01464	1e-06	3e-06		DR1	3610	7.80898	0	0
SPINK8	12653	-5.01572	1e-06	3e-06		C17orf67	1492	7.80598	0	0
ZNF717	15486	-5.01612	1e-06	3e-06		TSTD1	14131	7.80515	0	0
TRPM7	14064	-5.01727	1e-06	3e-06		PTRH1	10614	7.79274	0	0
NBPF1	8537	-5.01998	1e-06	3e-06		ZFP64	15036	7.79261	0	0
ATF6B	965	-5.02438	1e-06	2e-06		GRASP	5289	7.78443	0	0
ZNF283	15199	-5.0246	1e-06	2e-06		SPACA9	12590	7.78434	0	0
PRKAR2A	10347	-5.02684	0	2e-06		RCN1	10960	7.77732	0	0
AKAP1	392	-5.02887	0	2e-06		TMEM53	13701	7.77533	0	0
WHAMMP2	14768	-5.03052	0	2e-06		DAPL1	3159	7.77414	0	0
FAM216A	4328	-5.03287	0	2e-06		MACROD2	7541	7.76054	0	0
SLC25A34	12111	-5.03341	0	2e-06		SEC61A2	11732	7.76013	0	0
GLA	5037	-5.03373	0	2e-06		LOC100129291	7114	7.75933	0	0
SNRNP40	12473	-5.03644	0	2e-06		CYHR1	3091	7.75557	0	0
ZNF280D	15197	-5.03819	0	2e-06		GPT2	5277	7.75534	0	0
NARS	8517	-5.0387	0	2e-06		NCKAP1	8564	7.7525	0	0
EPB41L1	3995	-5.04083	0	2e-06		EMC7	3928	7.74425	0	0
HSD11B2	5824	-5.04234	0	2e-06		WTIP	14804	7.73323	0	0
ZNFX1	15580	-5.045	0	2e-06		DDAH2	3232	7.72956	0	0
PTPN12	10580	-5.04893	0	2e-06		PHF13	9726	7.72925	0	0
C16orf72	1481	-5.05004	0	2e-06		SPATA18	12604	7.72837	0	0
ZMYM6	15089	-5.05145	0	2e-06		HACD4	5448	7.71238	0	0
ZNF75A	15508	-5.05223	0	2e-06		SLC39A12	12216	7.71113	0	0
CNNM3	2638	-5.05235	0	2e-06		GALNTL5	4872	7.71066	0	0
BACE2	1153	-5.05274	0	2e-06		KLF6	6573	7.69929	0	0
TMCC2	13512	-5.05497	0	2e-06		LOC441052	7273	7.69894	0	0
CTSZ	3018	-5.05639	0	2e-06		OPTN	9175	7.69586	0	0
MINDY2	7976	-5.06007	0	2e-06		OVOL2	9288	7.67756	0	0
DNAAF5	3468	-5.06094	0	2e-06		UFC1	14380	7.67405	0	0
LRRC38	7404	-5.06183	0	2e-06		PRMT2	10376	7.67175	0	0
KTN1	6736	-5.06391	0	2e-06		TRUB1	14072	7.6689	0	0
SLC38A5	12209	-5.06691	0	2e-06		FZR1	4803	7.66017	0	0
C3orf38	1613	-5.06839	0	2e-06		DDRGK1	3246	7.64649	0	0
SV2C	12998	-5.06858	0	2e-06		NELFE	8683	7.64579	0	0
SOGA3	12537	-5.0694	0	2e-06		ATXN10	1083	7.64457	0	0
PIM3	9826	-5.07047	0	2e-06		SLCO1C1	12304	7.64316	0	0
ABCG4	59	-5.07128	0	2e-06		PLPBP	9977	7.64055	0	0
TTC17	14141	-5.07186	0	2e-06		FAM131A	4236	7.63722	0	0
DDX5	3272	-5.07192	0	2e-06		ARHGAP33	766	7.63422	0	0
ARID4B	810	-5.07352	0	2e-06		CISD3	2494	7.63326	0	0
CRTC3	2906	-5.07385	0	2e-06		FTH1	4752	7.63051	0	0
PARD6B	9393	-5.07391	0	2e-06		SCG3	11634	7.6293	0	0
EHD2	3812	-5.075	0	2e-06		LRRC36	7400	7.62859	0	0
ZFP82	15039	-5.07775	0	2e-06		SMIM10L2B	12381	7.62532	0	0
WAPL	14669	-5.08008	0	2e-06		MT1X	8275	7.62243	0	0
STXBP5L	12940	-5.081	0	2e-06		PPP1R1A	10227	7.61741	0	0
EPC1	4003	-5.08452	0	2e-06		BORCS7	1340	7.61226	0	0
MAP1LC3B2	7612	-5.08813	0	2e-06		CPNE5	2829	7.61057	0	0
NRG1	8965	-5.08852	0	2e-06		OR14I1	9187	7.60792	0	0
LOC389765	7250	-5.09168	0	2e-06		SMIM4	12398	7.60351	0	0
MFSD2A	7907	-5.09395	0	2e-06		ARHGDIB	779	7.60343	0	0
SPNS2	12659	-5.09435	0	2e-06		ACTC1	165	7.60296	0	0
INSIG2	6113	-5.09435	0	2e-06		ANK3	537	7.5967	0	0
RNPC3	11253	-5.09444	0	2e-06		GABBR1	4819	7.59637	0	0
LRRC34	7399	-5.09483	0	2e-06		LINC01547	7024	7.59216	0	0
THSD7A	13405	-5.09499	0	2e-06		ACKR3	126	7.58407	0	0
INA	6080	-5.09718	0	2e-06		MAN1A1	7589	7.57821	0	0
GNPAT	5129	-5.09847	0	2e-06		SGSH	11897	7.5732	0	0
XKR8	14822	-5.09876	0	2e-06		AKR7L	416	7.57004	0	0
MXD1	8361	-5.09932	0	2e-06		PCDH8	9467	7.55929	0	0
GHDC	4997	-5.0994	0	2e-06		PTBP2	10536	7.55756	0	0
PTH1R	10563	-5.10404	0	2e-06		PNMA8A	10041	7.55423	0	0
MTR	8324	-5.10764	0	2e-06		MT3	8277	7.55197	0	0
ESM1	4089	-5.1098	0	2e-06		GSS	5354	7.55133	0	0
LOC100130950	7121	-5.11029	0	2e-06		FAM19A1	4303	7.54907	0	0
AZGP1	1110	-5.11479	0	2e-06		ETFB	4105	7.54738	0	0
KNDC1	6641	-5.11552	0	2e-06		TTYH1	14191	7.5457	0	0
ZNF146	15118	-5.11661	0	2e-06		GPM6B	5207	7.54503	0	0
PLOD2	9973	-5.11705	0	2e-06		C1R	1529	7.54332	0	0
LOC151174	7232	-5.11744	0	2e-06		LOC93622	7327	7.53897	0	0
RPF1	11286	-5.11988	0	2e-06		GINS2	5016	7.53149	0	0
LOC642929	7286	-5.12226	0	2e-06		GRIK2	5306	7.52963	0	0
ULK3	14403	-5.12406	0	2e-06		PAX6	9427	7.52761	0	0
PHACTR2	9714	-5.12433	0	2e-06		RXRA	11517	7.52611	0	0
MX1	8359	-5.1248	0	2e-06		MRPL20	8165	7.52461	0	0
HAPLN4	5463	-5.12571	0	2e-06		MDGA1	7779	7.51878	0	0
PFDN1	9672	-5.12781	0	2e-06		KCTD4	6430	7.51377	0	0
EID3	3821	-5.12848	0	1e-06		PHF20L1	9731	7.51372	0	0
AAK1	13	-5.1285	0	1e-06		PTDSS1	10545	7.50759	0	0
PRC1	10297	-5.12976	0	1e-06		KLHL2	6592	7.50423	0	0
RFX7	11042	-5.13087	0	1e-06		E2F5	3711	7.50384	0	0
BEAN1	1250	-5.13422	0	1e-06		TM7SF2	13496	7.49636	0	0
C15orf41	1473	-5.13434	0	1e-06		SP5	12583	7.49622	0	0
BCL10	1216	-5.13485	0	1e-06		C1QL2	1522	7.49481	0	0
NDUFAF7	8622	-5.13574	0	1e-06		EMID1	3936	7.48027	0	0
PDSS1	9614	-5.13645	0	1e-06		VKORC1L1	14593	7.47789	0	0
KIAA0391	6477	-5.13865	0	1e-06		DHRS4	3367	7.4753	0	0
EZH2	4165	-5.13983	0	1e-06		GLT8D2	5072	7.47313	0	0
DENND5B	3313	-5.1408	0	1e-06		WDR54	14728	7.45982	0	0
ZGRF1	15059	-5.14411	0	1e-06		RAPH1	10835	7.45973	0	0
CROCCP3	2899	-5.14774	0	1e-06		KCNMB2	6397	7.45808	0	0
LDB1	6834	-5.14871	0	1e-06		SLIT3	12318	7.45348	0	0
AGL	339	-5.14922	0	1e-06		SIRT3	11995	7.45191	0	0
MKLN1	8010	-5.15103	0	1e-06		ARPP19	867	7.44866	0	0
EIF4E1B	3860	-5.15345	0	1e-06		STX1A	12927	7.44763	0	0
ZNF684	15458	-5.15452	0	1e-06		RPH3AL	11291	7.44678	0	0
LOC728024	7304	-5.16374	0	1e-06		CRSP8P	2901	7.44544	0	0
SEPHS1	11785	-5.16383	0	1e-06		STOX1	12901	7.4454	0	0
TPP2	13895	-5.1644	0	1e-06		CBLN1	1874	7.4435	0	0
ARHGAP39	769	-5.16497	0	1e-06		ARNT2	856	7.43654	0	0
LMBR1	7081	-5.16689	0	1e-06		OCA2	9125	7.43563	0	0
SPTBN5	12700	-5.17049	0	1e-06		FAH	4196	7.43422	0	0
ANKRA2	547	-5.1707	0	1e-06		KCTD12	6419	7.4335	0	0
TPCN1	13877	-5.17258	0	1e-06		MEA1	7792	7.43248	0	0
TMEM81	13723	-5.17495	0	1e-06		GTF2F2	5377	7.43008	0	0
DCLK1	3203	-5.17633	0	1e-06		ABCC6	47	7.42896	0	0
PYROXD1	10664	-5.17682	0	1e-06		LOC642852	7285	7.42394	0	0
OR7E47P	9229	-5.17807	0	1e-06		TAF10	13091	7.42273	0	0
TSHZ3	14091	-5.18026	0	1e-06		PIK3CD	9816	7.41358	0	0
GPR146	5224	-5.18075	0	1e-06		HCST	5505	7.40165	0	0
TBC1D1	13164	-5.18231	0	1e-06		FAM49A	4360	7.40065	0	0
DNAJC28	3508	-5.18277	0	1e-06		TUSC3	14230	7.39945	0	0
SIKE1	11979	-5.18295	0	1e-06		FZD1	4793	7.39702	0	0
ZDHHC13	14987	-5.18561	0	1e-06		ACOX3	140	7.3952	0	0
LARP4	6788	-5.18817	0	1e-06		WRB	14795	7.39328	0	0
POLR1D	10092	-5.18873	0	1e-06		CERS1	2329	7.39257	0	0
MASP2	7701	-5.18893	0	1e-06		RNF181	11211	7.38539	0	0
TRIM44	13996	-5.19123	0	1e-06		KIF2A	6534	7.38534	0	0
TCAIM	13228	-5.19241	0	1e-06		UBE2D2	14297	7.37848	0	0
RAB40A	10733	-5.19255	0	1e-06		FOXRED2	4710	7.36873	0	0
KLF13	6565	-5.19524	0	1e-06		BPHL	1344	7.36754	0	0
KLHL28	6599	-5.19676	0	1e-06		FABP3	4184	7.36746	0	0
AP4E1	658	-5.19692	0	1e-06		NRCAM	8960	7.36718	0	0
PLEKHA6	9934	-5.19868	0	1e-06		RNASEH2C	11167	7.36447	0	0
ALDH1A3	430	-5.19913	0	1e-06		FAR2P1	4422	7.36364	0	0
CCNI	2037	-5.20551	0	1e-06		VEZT	14579	7.36262	0	0
CCNO	2043	-5.20625	0	1e-06		TBC1D24	13180	7.36118	0	0
MRPL50	8193	-5.20735	0	1e-06		LOC100506100	7147	7.35195	0	0
ZNF773	15521	-5.21037	0	1e-06		SMAD2	12336	7.34685	0	0
PMS2P3	10024	-5.21179	0	1e-06		KCNB2	6348	7.34563	0	0
ARID1B	805	-5.21223	0	1e-06		DLG2	3431	7.34193	0	0
NECAB3	8655	-5.21281	0	1e-06		TRIM24	13981	7.34006	0	0
PPIL2	10187	-5.21472	0	1e-06		LINC00900	6975	7.3306	0	0
TIGD3	13422	-5.2161	0	1e-06		SNTG2	12491	7.32424	0	0
XPO4	14829	-5.21685	0	1e-06		NAGK	8488	7.31904	0	0
UTP23	14529	-5.21802	0	1e-06		TYRO3	14262	7.3116	0	0
MCPH1	7766	-5.21816	0	1e-06		EPHA10	4009	7.30605	0	0
DHFR2	3357	-5.21816	0	1e-06		NPY5R	8931	7.29773	0	0
PDCD7	9551	-5.21837	0	1e-06		DNAH5	3473	7.29562	0	0
CCNL1	2041	-5.22258	0	1e-06		MT1F	8270	7.28483	0	0
MAST4	7705	-5.22535	0	1e-06		CRLF1	2890	7.28369	0	0
RERGL	11003	-5.22711	0	1e-06		AKR1C3	410	7.28177	0	0
FAM160B2	4260	-5.22941	0	1e-06		CMTM8	2616	7.28047	0	0
TCF7L2	13256	-5.2309	0	1e-06		TSEN34	14083	7.27816	0	0
EPHB2	4018	-5.233	0	1e-06		DIRAS3	3408	7.27239	0	0
ZNF638	15425	-5.23636	0	1e-06		SHC3	11941	7.26443	0	0
PUDP	10622	-5.24365	0	1e-06		AQP4	715	7.26228	0	0
LMO2	7092	-5.2437	0	1e-06		TPD52	13879	7.26202	0	0
STAG3L4	12832	-5.24456	0	1e-06		TKFC	13460	7.26094	0	0
STS	12914	-5.24635	0	1e-06		PHACTR3	9715	7.26041	0	0
TAS2R19	13145	-5.24816	0	1e-06		AKAP8	401	7.25795	0	0
WDR97	14753	-5.25305	0	1e-06		GLP2R	5060	7.25791	0	0
C15orf59	1474	-5.25459	0	1e-06		FOXN3-AS1	4701	7.25695	0	0
MON2	8078	-5.2558	0	1e-06		FAM86FP	4390	7.25052	0	0
SYT6	13062	-5.25629	0	1e-06		LOC100507516	7163	7.24994	0	0
BRINP1	1366	-5.25651	0	1e-06		KCNA5	6343	7.24925	0	0
LTB	7475	-5.25776	0	1e-06		TMEM18	13608	7.2483	0	0
UBL3	14338	-5.25859	0	1e-06		AHCY	357	7.24808	0	0
THOC2	13395	-5.26004	0	1e-06		CCK	2008	7.24534	0	0
SLC47A1	12242	-5.2601	0	1e-06		RASL10A	10865	7.24396	0	0
PDP1	9606	-5.26109	0	1e-06		TTPAL	14187	7.24358	0	0
LOC100190986	7130	-5.26203	0	1e-06		MED16	7807	7.24326	0	0
FBLN7	4448	-5.26207	0	1e-06		TNNI3	13805	7.23998	0	0
ZNF180	15130	-5.26384	0	1e-06		EIF3J	3851	7.23715	0	0
PRDM5	10307	-5.26403	0	1e-06		HGF	5582	7.23551	0	0
LOC101927550	7177	-5.26581	0	1e-06		HDC	5517	7.23523	0	0
RAB30	10713	-5.26664	0	1e-06		ZC3HAV1	14963	7.23148	0	0
RTEL1	11473	-5.26901	0	1e-06		UQCC2	14439	7.22577	0	0
CCDC144CP	1926	-5.27187	0	1e-06		ALPL	479	7.2256	0	0
PPP1R35	10234	-5.27232	0	1e-06		MT1M	8274	7.22061	0	0
CCNE1	2031	-5.27398	0	1e-06		RCN2	10961	7.21724	0	0
WDR75	14740	-5.27497	0	1e-06		PSENEN	10474	7.21187	0	0
ARL4C	828	-5.27975	0	1e-06		STX12	12920	7.21041	0	0
TMEM41B	13691	-5.28235	0	1e-06		GASAL1	4900	7.20939	0	0
CDHR3	2189	-5.28693	0	1e-06		ELFN2	3888	7.20263	0	0
FBXL6	4466	-5.28831	0	1e-06		FHOD3	4581	7.20159	0	0
CYP2U1	3109	-5.28873	0	1e-06		SLC1A4	12061	7.19663	0	0
TFB1M	13335	-5.29165	0	1e-06		TUBB3	14207	7.19515	0	0
NRIP2	8971	-5.29506	0	1e-06		HCG23	5493	7.19056	0	0
DNASE1L2	3525	-5.29618	0	1e-06		PYDC1	10657	7.18443	0	0
PRRT3	10444	-5.2967	0	1e-06		BAIAP2L2	1167	7.17873	0	0
TMTC4	13760	-5.29966	0	1e-06		BAIAP2	1165	7.17589	0	0
ARL5B	831	-5.3023	0	1e-06		RHEBL1	11088	7.1747	0	0
GON7	5162	-5.3038	0	1e-06		ACAT2	111	7.17302	0	0
LONRF3	7333	-5.30622	0	1e-06		ADGRB3	263	7.16974	0	0
LOC100506388	7152	-5.30806	0	1e-06		GSTM5	5363	7.16961	0	0
DDX55	3277	-5.30851	0	1e-06		LMAN2L	7080	7.16925	0	0
MOGAT2	8072	-5.30874	0	1e-06		SLC27A5	12145	7.16896	0	0
LOC729218	7315	-5.31243	0	1e-06		CRYM	2920	7.16258	0	0
SMARCD2	12355	-5.31665	0	1e-06		GALM	4854	7.16175	0	0
RBM14	10902	-5.31671	0	1e-06		S100A6	11534	7.15849	0	0
ATPAF2	1075	-5.31816	0	1e-06		GOLM1	5156	7.15601	0	0
SLC35B4	12182	-5.31914	0	1e-06		PDGFRA	9584	7.15576	0	0
BAAT	1149	-5.31971	0	1e-06		PRPH2	10411	7.15351	0	0
LAT	6796	-5.32294	0	1e-06		NUDT4	9059	7.15224	0	0
HMBS	5709	-5.32503	0	1e-06		LOC105372480	7208	7.15164	0	0
KCNA2	6340	-5.3268	0	1e-06		SHISA4	11945	7.14966	0	0
ZBED6	14904	-5.32843	0	1e-06		STK32C	12880	7.14289	0	0
USP36	14497	-5.32918	0	1e-06		ZSWIM9	15622	7.12979	0	0
PAXBP1	9431	-5.3308	0	1e-06		CACUL1	1738	7.12562	0	0
CLEC4M	2549	-5.33312	0	1e-06		NIP7	8766	7.11906	0	0
BRF1	1361	-5.33782	0	1e-06		MRPL30	8173	7.11874	0	0
KSR2	6735	-5.33893	0	1e-06		TMEM42	13692	7.1053	0	0
CCDC144B	1925	-5.3392	0	1e-06		LGI4	6874	7.10032	0	0
SMARCC1	12352	-5.34019	0	1e-06		TUBA1B	14196	7.10029	0	0
PHC2	9721	-5.3442	0	1e-06		TUNAR	14227	7.09682	0	0
ZNF234	15166	-5.34499	0	1e-06		GRB14	5291	7.09234	0	0
GDAP2	4937	-5.34686	0	0		LRRC42	7410	7.08345	0	0
NDUFS1	8638	-5.34687	0	0		FBXL16	4456	7.08108	0	0
PPIP5K1	10191	-5.34702	0	0		CCDC153	1934	7.07889	0	0
CCT6A	2064	-5.34838	0	0		TNFRSF14	13782	7.07876	0	0
TIA1	13412	-5.34889	0	0		GNB2	5109	7.07873	0	0
SLC35F3	12192	-5.35042	0	0		HRAS	5800	7.07717	0	0
SLFN5	12313	-5.35116	0	0		TAC1	13078	7.07417	0	0
CTIF	2990	-5.35143	0	0		CASQ1	1854	7.0737	0	0
JMJD6	6283	-5.35389	0	0		CAMK2D	1772	7.07023	0	0
SEL1L3	11742	-5.35591	0	0		ADRB2	300	7.06332	0	0
LINC00115	6921	-5.35953	0	0		TNFAIP8L1	13773	7.06128	0	0
PLEKHA8	9936	-5.35986	0	0		MECR	7796	7.05684	0	0
GABRB2	4832	-5.3619	0	0		C12orf45	1455	7.05509	0	0
KANSL2	6311	-5.36352	0	0		SNAPC5	12436	7.05381	0	0
FAIM	4201	-5.36645	0	0		PPIL6	10190	7.05248	0	0
RICTOR	11112	-5.37245	0	0		IKBIP	6015	7.05024	0	0
GABPB1-IT1	4824	-5.37544	0	0		ANKRD50	594	7.0472	0	0
WASHC1	14676	-5.37638	0	0		GNG10	5114	7.04708	0	0
MAP3K13	7626	-5.37835	0	0		JMJD1C-AS1	6281	7.04586	0	0
CAMK2G	1773	-5.38768	0	0		TMEM59L	13705	7.04552	0	0
CHD9	2401	-5.38926	0	0		DNALI1	3522	7.04186	0	0
FOXP2	4705	-5.39065	0	0		IL34	6050	7.03883	0	0
TSEN54	14084	-5.39255	0	0		GTF3C6	5394	7.03784	0	0
FAM135A	4243	-5.39311	0	0		PDHB	9588	7.03701	0	0
PPP1R15B	10222	-5.39327	0	0		RAPGEF4	10831	7.03607	0	0
ELOVL7	3912	-5.39844	0	0		NEUROD6	8706	7.03467	0	0
PCDHB14	9477	-5.39939	0	0		NETO2	8695	7.02262	0	0
TXLNG	14241	-5.40011	0	0		ARHGAP4	770	7.02091	0	0
CCDC184	1949	-5.40085	0	0		ARMCX2	849	7.01681	0	0
NFKB1	8728	-5.40189	0	0		CSGALNACT1	2937	7.01513	0	0
TTC14	14139	-5.40321	0	0		GPC4	5191	7.01333	0	0
MLLT6	8030	-5.40627	0	0		UBE2E2	14302	7.01252	0	0
PPT2	10282	-5.40662	0	0		LOC105374546	7212	7.01198	0	0
GRM4	5328	-5.40693	0	0		PRSS1	10448	7.00998	0	0
CACNA1C	1716	-5.40854	0	0		RNF7	11245	7.00952	0	0
PASK	9419	-5.41086	0	0		NEBL-AS1	8652	7.00892	0	0
TOB1-AS1	13822	-5.41297	0	0		BTBD9	1399	7.00858	0	0
ST8SIA1	12821	-5.41459	0	0		ZFP69	15037	7.00254	0	0
TRIM26	13983	-5.41469	0	0		SRM	12731	7.00085	0	0
INHBA	6093	-5.41701	0	0		ADAMTS19	220	6.99885	0	0
RGS2	11065	-5.41758	0	0		MYH10	8390	6.99012	0	0
SLC39A14	12218	-5.42212	0	0		CYTOR	3133	6.98888	0	0
DPT	3594	-5.42289	0	0		USP9X	14519	6.9855	0	0
CAMK2N2	1775	-5.42571	0	0		LOH12CR2	7328	6.98444	0	0
NREP	8963	-5.42615	0	0		DCAF11	3180	6.98219	0	0
IL17RE	6035	-5.42698	0	0		GPRIN1	5269	6.97834	0	0
DPY19L2P4	3601	-5.4286	0	0		DDX10	3249	6.97575	0	0
PHF6	9738	-5.42887	0	0		HTR1E	5872	6.97066	0	0
NFXL1	8738	-5.42953	0	0		STK25	12877	6.96682	0	0
WASHC2C	14678	-5.43143	0	0		DCUN1D5	3227	6.96638	0	0
SLC25A17	12095	-5.43147	0	0		BAALC	1147	6.96588	0	0
TADA2B	13088	-5.43311	0	0		GPRIN2	5270	6.96438	0	0
ZNF398	15257	-5.43388	0	0		MEST	7855	6.96389	0	0
GPR158	5232	-5.43438	0	0		ZNF219	15152	6.96093	0	0
NONO	8860	-5.43762	0	0		ECHDC3	3733	6.95918	0	0
ZNF500	15318	-5.44102	0	0		SOWAHA	12552	6.9584	0	0
CHML	2416	-5.4433	0	0		ARMC10	841	6.95614	0	0
GALE	4851	-5.44915	0	0		GSTM2	5359	6.9539	0	0
B3GNT9	1133	-5.44932	0	0		POLR2G	10100	6.94662	0	0
MCU	7773	-5.44968	0	0		FAM181A	4284	6.9451	0	0
PDXDC2P-NPIPB14P	9617	-5.4501	0	0		NCAM2	8546	6.94047	0	0
INPP5F	6108	-5.45157	0	0		HDAC9	5516	6.93841	0	0
CADM4	1744	-5.45174	0	0		TMEM141	13567	6.93612	0	0
GIGYF2	5007	-5.45293	0	0		FZD2	4795	6.92612	0	0
CCDC84	1987	-5.45519	0	0		DDX25	3260	6.92173	0	0
SLC5A4	12263	-5.46294	0	0		PKP3	9879	6.91758	0	0
LMLN	7088	-5.46435	0	0		SELENBP1	11743	6.91683	0	0
BTBD8	1398	-5.46462	0	0		MSMO1	8254	6.9164	0	0
NEK8	8678	-5.46482	0	0		SH3BGR	11910	6.9164	0	0
PRDM2	10305	-5.46794	0	0		TSPOAP1	14118	6.91625	0	0
IQUB	6167	-5.46797	0	0		RFLNB	11026	6.9149	0	0
PMS2P5	10026	-5.46867	0	0		TRABD2A	13919	6.91446	0	0
AGAP11	325	-5.46891	0	0		NUS1	9094	6.91012	0	0
HMCES	5710	-5.47175	0	0		KIAA1024	6486	6.90648	0	0
FAM167B	4269	-5.4736	0	0		MRPL37	8179	6.90411	0	0
P3H1	9313	-5.4783	0	0		ARPC3	862	6.89803	0	0
VWDE	14665	-5.48127	0	0		NPDC1	8897	6.89691	0	0
WIPI1	14775	-5.48239	0	0		DLK2	3441	6.88974	0	0
PSMG2	10522	-5.48245	0	0		FLJ33534	4623	6.88639	0	0
GART	4890	-5.48278	0	0		SYTL5	13068	6.88559	0	0
TIMM23B	13436	-5.48634	0	0		RTBDN	11470	6.88396	0	0
ANKRD18CP	559	-5.48707	0	0		RARA-AS1	10838	6.88328	0	0
TC2N	13226	-5.4876	0	0		DPCD	3573	6.88178	0	0
APIP	684	-5.492	0	0		RANBP3L	10814	6.87894	0	0
MTRF1	8326	-5.49304	0	0		TRPV2	14068	6.8767	0	0
TPSG1	13904	-5.49327	0	0		NABP1	8474	6.87645	0	0
FSBP	4740	-5.49469	0	0		TDRKH	13286	6.86791	0	0
ZSCAN23	15606	-5.49599	0	0		EYA2	4161	6.86756	0	0
KIAA0586	6479	-5.49691	0	0		FDX1L	4525	6.86581	0	0
ZNF284	15200	-5.49834	0	0		FAM207A	4312	6.86356	0	0
NIPBL-AS1	8773	-5.50056	0	0		SERPINF1	11820	6.86257	0	0
USP53	14513	-5.50171	0	0		PTGES	10555	6.84984	0	0
ERO1B	4080	-5.50753	0	0		IDH2	5923	6.84386	0	0
GPATCH2L	5182	-5.51013	0	0		DNAL4	3521	6.84158	0	0
TMEM255B	13668	-5.51142	0	0		SDK2	11703	6.83384	0	0
UBE2D1	14296	-5.51364	0	0		AIFM2	373	6.83279	0	0
TDP2	13279	-5.51783	0	0		CD24	2086	6.8311	0	0
NKAPP1	8787	-5.51939	0	0		ADGRV1	273	6.8218	0	0
PGGT1B	9701	-5.51978	0	0		LOC101927811	7181	6.82085	0	0
MIR9-3HG	7997	-5.52231	0	0		GBAP1	4911	6.81902	0	0
KIAA2013	6511	-5.52498	0	0		EPB41L4B	4001	6.81767	0	0
RBM41	10922	-5.52712	0	0		FAM86EP	4389	6.8134	0	0
RBM48	10926	-5.52762	0	0		METTL5	7880	6.80885	0	0
MPHOSPH9	8105	-5.52918	0	0		GALNT14	4861	6.8046	0	0
ZNF518A	15331	-5.52944	0	0		STX7	12934	6.80223	0	0
KYAT1	6739	-5.53197	0	0		KCNN2	6400	6.80111	0	0
ZNF141	15115	-5.53311	0	0		UQCC3	14440	6.79402	0	0
GSTK1	5357	-5.53554	0	0		BBOX1	1188	6.79242	0	0
PPARGC1A	10159	-5.54162	0	0		IGFBP5	5993	6.79152	0	0
ADCY3	246	-5.54696	0	0		LCLAT1	6822	6.79064	0	0
MED11	7799	-5.54756	0	0		RSPH1	11457	6.78664	0	0
KMT2D	6636	-5.54894	0	0		FILIP1L	4591	6.78583	0	0
ADAMTS5	223	-5.54914	0	0		BEX1	1263	6.78051	0	0
CORO7	2786	-5.55272	0	0		TOMM6	13838	6.77936	0	0
MRPS5	8228	-5.55278	0	0		PRSS23	10452	6.77781	0	0
SLC2A11	12153	-5.55371	0	0		PJA1	9859	6.77755	0	0
ADCY8	251	-5.55487	0	0		RTN3	11485	6.7771	0	0
ADSSL1	304	-5.56022	0	0		ZNF469	15300	6.77169	0	0
TANK	13124	-5.56151	0	0		RTL8A	11481	6.7684	0	0
GUCD1	5405	-5.56259	0	0		ACTA1	161	6.76783	0	0
ZMYM2	15085	-5.56446	0	0		WDR7	14736	6.7663	0	0
PLAUR	9903	-5.56568	0	0		DACT3	3146	6.76412	0	0
TXLNGY	14242	-5.56744	0	0		ACTR3B	181	6.76406	0	0
STAM2	12835	-5.56798	0	0		P2RX5	9303	6.76362	0	0
DSCAML1	3626	-5.56916	0	0		LOR	7334	6.7599	0	0
SCARF2	11626	-5.57266	0	0		GGN	4982	6.75774	0	0
ARID3B	808	-5.57289	0	0		SUMO3	12970	6.75422	0	0
CNNM1	2636	-5.57367	0	0		TBCB	13198	6.74191	0	0
NSUN5	9005	-5.5758	0	0		SC5D	11605	6.74153	0	0
NFKBIA	8729	-5.57711	0	0		C19orf12	1500	6.73991	0	0
DPH7	3583	-5.57851	0	0		C20orf27	1568	6.73949	0	0
MTERF2	8288	-5.57922	0	0		MIF	7967	6.73355	0	0
RFX5	11041	-5.57977	0	0		FLRT1	4633	6.73162	0	0
FAAH2	4179	-5.58011	0	0		HECTD2	5540	6.72741	0	0
N4BP1	8451	-5.5807	0	0		FIGNL2	4589	6.72666	0	0
CELF2	2262	-5.58144	0	0		RRAS2	11430	6.72632	0	0
UBE2G1	14304	-5.58277	0	0		PGAM5	9691	6.72495	0	0
MAP1LC3B	7611	-5.58528	0	0		DLEU7	3429	6.72458	0	0
LOC101926935	7171	-5.58853	0	0		DCAF4	3188	6.72276	0	0
HSPB9	5863	-5.58933	0	0		B3GAT1	1123	6.71934	0	0
SLC9A1	12293	-5.5934	0	0		FUOM	4767	6.71492	0	0
RMC1	11151	-5.59422	0	0		SAMD15	11561	6.71404	0	0
TRIM33	13989	-5.59432	0	0		CLPB	2578	6.70802	0	0
SLC39A7	12222	-5.59455	0	0		PTRHD1	10616	6.70534	0	0
CPLX2	2821	-5.59502	0	0		PITPNB	9852	6.70094	0	0
METTL2A	7876	-5.59533	0	0		RASGRF2	10859	6.6996	0	0
TSPAN1	14097	-5.59604	0	0		SLC39A4	12220	6.69898	0	0
TTTY15	14190	-5.59704	0	0		SLC25A22	12100	6.69728	0	0
LINC00473	6940	-5.6012	0	0		TUBB2B	14206	6.69654	0	0
PALB2	9357	-5.60899	0	0		ISG15	6191	6.69585	0	0
RPRD2	11366	-5.61117	0	0		ISOC1	6199	6.69559	0	0
CIZ1	2500	-5.61785	0	0		ROBO2	11259	6.69344	0	0
CBWD5	1882	-5.61787	0	0		BSN	1383	6.68762	0	0
BSDC1	1381	-5.61814	0	0		TBXA2R	13223	6.68561	0	0
HMGXB3	5729	-5.61851	0	0		TBC1D26	13182	6.68339	0	0
MRPS30-DT	8222	-5.61973	0	0		GDPD2	4948	6.67789	0	0
LOC105378663	7220	-5.62014	0	0		SLC30A10	12163	6.67627	0	0
C18orf25	1498	-5.62902	0	0		GPR143	5223	6.66979	0	0
PPWD1	10284	-5.6292	0	0		HNRNPC	5748	6.66692	0	0
WASHC4	14680	-5.63261	0	0		NOVA2	8884	6.66586	0	0
RPSA	11416	-5.63645	0	0		RSPH14	11458	6.66371	0	0
HYDIN	5893	-5.63665	0	0		CDC42SE2	2158	6.66264	0	0
USP47	14508	-5.64053	0	0		TENM3	13305	6.65895	0	0
KBTBD12	6330	-5.64138	0	0		NNAT	8839	6.65619	0	0
HOMER3	5767	-5.64369	0	0		ARHGAP45	773	6.64945	0	0
PCNX2	9518	-5.64419	0	0		COP1	2750	6.64909	0	0
JADE1	6257	-5.64431	0	0		2025-03-01	7679	6.64743	0	0
BCL3	1227	-5.65125	0	0		MARCKS	7689	6.6471	0	0
ZNF669	15445	-5.65268	0	0		CCDC167	1941	6.64674	0	0
ADAMTSL1	227	-5.65458	0	0		PSMG3-AS1	10524	6.64494	0	0
ZNF507	15322	-5.65535	0	0		TCTA	13269	6.6409	0	0
KANSL1	6308	-5.65722	0	0		MEDAG	7828	6.63657	0	0
CCSER1	2058	-5.66198	0	0		CNN3	2635	6.63553	0	0
CAAP1	1699	-5.66218	0	0		ABCC12	45	6.63551	0	0
ZNF470	15301	-5.66324	0	0		LONRF2	7332	6.63033	0	0
POU2F2	10144	-5.66417	0	0		PTCHD1	10542	6.6288	0	0
CFAP69	2351	-5.66729	0	0		RIMBP2	11119	6.62529	0	0
TTC39A	14160	-5.67219	0	0		PCMT1	9511	6.62227	0	0
EEF2K	3767	-5.67261	0	0		ARFGEF3	739	6.62218	0	0
STRADA	12905	-5.674	0	0		PRSS3	10454	6.61996	0	0
ATP6AP1L	1042	-5.67652	0	0		UBE2N	14316	6.61145	0	0
LGI2	6872	-5.67737	0	0		SEZ6L	11851	6.60906	0	0
LRRC8C	7434	-5.67828	0	0		ABCB6	39	6.60246	0	0
KCNV2	6415	-5.68032	0	0		IDNK	5929	6.60056	0	0
CHRD	2437	-5.68083	0	0		FAM229B	4341	6.59877	0	0
CDK19	2203	-5.68417	0	0		PIM2	9825	6.59426	0	0
POU3F2	10146	-5.68691	0	0		MIF-AS1	7968	6.59247	0	0
NUP54	9084	-5.68811	0	0		TBC1D13	13169	6.59173	0	0
THEM4	13387	-5.68873	0	0		PLB1	9904	6.59077	0	0
RELL2	10991	-5.68914	0	0		SRRD	12746	6.58911	0	0
NPR2	8918	-5.69104	0	0		DUSP2	3664	6.58803	0	0
IQCH-AS1	6158	-5.69121	0	0		NPPA	8915	6.58638	0	0
ZNF491	15314	-5.69586	0	0		P2RY13	9309	6.58455	0	0
CHD1	2392	-5.6995	0	0		OTUB2	9275	6.58289	0	0
IRAK1BP1	6169	-5.7085	0	0		KCNN3	6401	6.57887	0	0
GLS2	5069	-5.70948	0	0		JPH4	6291	6.57693	0	0
KRTAP5-2	6719	-5.70976	0	0		TOX3	13860	6.57664	0	0
TBR1	13214	-5.72041	0	0		ANKRD28	573	6.56785	0	0
CYB5R4	3081	-5.72205	0	0		MR1	8128	6.56637	0	0
DDX59	3280	-5.72811	0	0		ARHGAP5-AS1	775	6.56229	0	0
LGR6	6878	-5.72933	0	0		TRIM36	13991	6.55994	0	0
CLCN2	2519	-5.7301	0	0		FUCA1	4761	6.55905	0	0
ORAI3	9235	-5.73132	0	0		MAP2K1	7615	6.55857	0	0
SCN4B	11655	-5.73314	0	0		GLO1	5058	6.55742	0	0
GOLGA4	5145	-5.74386	0	0		NDST3	8598	6.55648	0	0
PTX3	10621	-5.74888	0	0		SSR4	12784	6.55617	0	0
CLIP4	2563	-5.75021	0	0		SIGIRR	11971	6.55365	0	0
VPS13C	14608	-5.75581	0	0		ASH2L	921	6.54847	0	0
EIF2S3	3840	-5.7607	0	0		VAV1	14559	6.54695	0	0
PHTF1	9760	-5.76331	0	0		UBE2A	14292	6.54256	0	0
VWA8	14661	-5.76774	0	0		WDR77	14741	6.53933	0	0
N4BP2	8452	-5.76892	0	0		BEGAIN	1252	6.53786	0	0
SLC46A3	12241	-5.7701	0	0		LINC02076	7050	6.53735	0	0
SOCS5	12530	-5.77023	0	0		OGG1	9145	6.53573	0	0
CCAR1	1895	-5.77095	0	0		NISCH	8778	6.53544	0	0
RGS6	11071	-5.77257	0	0		TMED10	13518	6.53367	0	0
PCMTD1	9512	-5.77266	0	0		PMVK	10029	6.53224	0	0
ZNF595	15395	-5.77348	0	0		PERM1	9650	6.53178	0	0
MPP1	8111	-5.77469	0	0		TWIST1	14235	6.52812	0	0
ZNF620	15414	-5.77472	0	0		SNX3	12514	6.52791	0	0
NPIPB11	8906	-5.77824	0	0		SPINT2	12654	6.52586	0	0
USP6NL	14516	-5.78319	0	0		FAM107A	4210	6.52292	0	0
DCAF1	3178	-5.78563	0	0		HOPX	5772	6.52231	0	0
DCLRE1A	3205	-5.78663	0	0		TRMT112	14035	6.51632	0	0
VN1R1	14600	-5.78817	0	0		UBE2L5	14312	6.5145	0	0
USP16	14475	-5.79095	0	0		SOX11	12558	6.51161	0	0
DSCAM	3625	-5.79226	0	0		MANF	7603	6.50687	0	0
ANKRD36C	585	-5.79456	0	0		ACTR10	176	6.50643	0	0
ZNF615	15410	-5.79468	0	0		RTL8C	11482	6.50436	0	0
GSDMB	5342	-5.79501	0	0		RUBCN	11496	6.50279	0	0
ZNF232	15164	-5.7985	0	0		RRP7BP	11445	6.50268	0	0
STX1B	12928	-5.79876	0	0		SOX5	12569	6.50052	0	0
RPL13P5	11302	-5.80265	0	0		HEYL	5579	6.4997	0	0
CCDC174	1945	-5.80341	0	0		CDC42P3	2156	6.49232	0	0
FBLIM1	4443	-5.8107	0	0		GBA	4909	6.49123	0	0
RASSF8-AS1	10877	-5.81394	0	0		VAT1	14557	6.48736	0	0
MCM7	7761	-5.81562	0	0		CCDC85A	1988	6.48541	0	0
FAM78B	4379	-5.81803	0	0		C16orf95	1488	6.4831	0	0
SUPT20H	12975	-5.81837	0	0		ERICH1	4066	6.48109	0	0
CRYGS	2918	-5.81964	0	0		BRMS1L	1372	6.48107	0	0
LOC100133331	7129	-5.8209	0	0		VWCE	14664	6.47784	0	0
ZCCHC9	14980	-5.82107	0	0		COCH	2686	6.47746	0	0
CALCOCO1	1750	-5.82127	0	0		SLC29A3	12149	6.4774	0	0
CCDC152	1933	-5.82846	0	0		AMZ2P1	514	6.47672	0	0
CEP192	2304	-5.83334	0	0		WDR26	14706	6.47528	0	0
KCND3	6355	-5.83376	0	0		SSC4D	12773	6.47515	0	0
SOAT1	12525	-5.83396	0	0		TLDC1	13465	6.46763	0	0
TCERG1	13245	-5.83777	0	0		C3orf14	1608	6.46584	0	0
CTNNAL1	2994	-5.839	0	0		AZIN1-AS1	1113	6.46577	0	0
ZNF182	15132	-5.83947	0	0		DACT1	3144	6.46506	0	0
MCF2L-AS1	7748	-5.84041	0	0		ATP9A	1072	6.45917	0	0
TIAL1	13413	-5.84197	0	0		FAM47E	4359	6.45684	0	0
LAMC1	6766	-5.84516	0	0		PKD2L1	9865	6.45677	0	0
WDR91	14750	-5.84534	0	0		KCNV1	6414	6.45641	0	0
FLYWCH2	4643	-5.84844	0	0		MYBPC1	8374	6.45478	0	0
DNAJC25	3506	-5.85251	0	0		SLC25A18	12096	6.45251	0	0
PCDHB12	9475	-5.85303	0	0		NORAD	8870	6.446	0	0
PTPRD	10597	-5.85355	0	0		CCR1	2050	6.4454	0	0
PRMT9	10382	-5.85358	0	0		DGKA	3341	6.44311	0	0
ZNF251	15174	-5.85494	0	0		APOE	693	6.44155	0	0
SRPK1	12739	-5.85521	0	0		CMTM4	2612	6.44118	0	0
CCER2	2005	-5.85673	0	0		OAZ1	9120	6.44113	0	0
EFNA5	3791	-5.85724	0	0		MAPK11	7652	6.43981	0	0
ZFP37	15033	-5.85784	0	0		CLDND2	2537	6.43905	0	0
POMC	10122	-5.86104	0	0		ARL10	817	6.43898	0	0
POMT1	10127	-5.86575	0	0		FRA10AC1	4715	6.43352	0	0
ELOVL4	3909	-5.86832	0	0		NETO1	8694	6.42984	0	0
TRNP1	14049	-5.8697	0	0		TPM3P9	13890	6.42674	0	0
MAP2K7	7621	-5.87018	0	0		A1BG	1	6.42286	0	0
AKT1S1	418	-5.87307	0	0		RUNDC3A	11502	6.42145	0	0
RGPD4	11053	-5.87386	0	0		CAMKV	1780	6.41992	0	0
NSUN5P2	9006	-5.87671	0	0		APOM	701	6.41657	0	0
ZNF780B	15528	-5.87756	0	0		PLS3	9991	6.41514	0	0
SMC2	12359	-5.87802	0	0		FSTL5	4749	6.41443	0	0
ST3GAL5	12807	-5.88036	0	0		ADGRG1	266	6.40889	0	0
ZNF785	15533	-5.88077	0	0		TYW5	14268	6.40679	0	0
DCPS	3212	-5.8823	0	0		LIN7B	6917	6.40514	0	0
RNF144A	11194	-5.88937	0	0		NIPSNAP1	8774	6.40181	0	0
DUBR	3650	-5.89059	0	0		ENC1	3955	6.40124	0	0
MAP3K9	7637	-5.89095	0	0		ERLIN1	4072	6.39916	0	0
CFAP53	2348	-5.89754	0	0		HMGCR	5720	6.39871	0	0
SRA1	12710	-5.90515	0	0		SLC35A2	12175	6.39757	0	0
KMT5B	6639	-5.9068	0	0		DNAAF4	3467	6.39518	0	0
LOC100288203	7138	-5.90846	0	0		ACADL	103	6.39257	0	0
SLC45A1	12237	-5.91232	0	0		GTDC1	5370	6.39142	0	0
SOHLH1	12538	-5.91341	0	0		WDR48	14724	6.39068	0	0
ZNF41	15260	-5.9146	0	0		CFAP44	2345	6.38996	0	0
SLC17A6	12049	-5.91521	0	0		NKAIN2	8782	6.38865	0	0
TNIP1	13795	-5.91633	0	0		UBE2S	14325	6.38827	0	0
PHAX	9717	-5.9228	0	0		MPP6	8115	6.38047	0	0
QRFPR	10675	-5.92342	0	0		TOX4	13861	6.3752	0	0
ITGB1	6224	-5.92354	0	0		MOXD1	8095	6.37502	0	0
TCTEX1D1	13272	-5.92601	0	0		SNHG8	12461	6.36853	0	0
CDKN1B	2225	-5.9283	0	0		DAD1	3147	6.36737	0	0
SIRT4	11996	-5.93441	0	0		TMEM106C	13534	6.36619	0	0
NEK1	8671	-5.93947	0	0		B3GALNT1	1116	6.36431	0	0
ZNF654	15434	-5.9398	0	0		STOM	12896	6.36088	0	0
SEMA4C	11766	-5.94387	0	0		FAM184A	4287	6.35777	0	0
KDELC1	6436	-5.94529	0	0		DIO2	3400	6.35604	0	0
SYT12	13052	-5.94574	0	0		SV2B	12997	6.35183	0	0
GNB3	5110	-5.94589	0	0		NUDT18	9054	6.34971	0	0
TBC1D8	13193	-5.94795	0	0		MRPS25	8217	6.34968	0	0
MXI1	8364	-5.95146	0	0		CXADR	3050	6.34825	0	0
SLC6A6	12274	-5.95478	0	0		WDFY4	14693	6.34295	0	0
DAXX	3162	-5.95782	0	0		VCL	14565	6.34222	0	0
ATAD2B	951	-5.95814	0	0		PRDX1	10310	6.34168	0	0
TAF3	13102	-5.95885	0	0		DNAL1	3520	6.34123	0	0
ITPK1	6239	-5.95981	0	0		APTR	710	6.34023	0	0
RBBP4	10884	-5.96091	0	0		LSM7	7466	6.33808	0	0
LOC727896	7303	-5.96141	0	0		USP12	14471	6.33748	0	0
SLMAP	12326	-5.9665	0	0		SLC17A7	12050	6.33608	0	0
KIAA1614	6505	-5.96725	0	0		CEP83	2319	6.33167	0	0
ECM1	3737	-5.96845	0	0		CEP170B	2301	6.32173	0	0
SETD7	11844	-5.97559	0	0		PALM	9360	6.31434	0	0
HIST1H1A	5619	-5.97701	0	0		C2CD2L	1580	6.3106	0	0
TAS2R45	13152	-5.97897	0	0		UMPS	14408	6.31001	0	0
PKD2	9864	-5.97897	0	0		HPCA	5783	6.30857	0	0
PLAT	9901	-5.9795	0	0		CRMP1	2894	6.3085	0	0
ATAD1	949	-5.98005	0	0		CASC10	1833	6.30806	0	0
HAUS8	5475	-5.982	0	0		SRSF12	12755	6.3005	0	0
ALKBH8	469	-5.98477	0	0		NMNAT3	8832	6.29814	0	0
SRSF8	12762	-5.98616	0	0		PRSS3P2	10457	6.29768	0	0
KLF12	6564	-5.98753	0	0		AP1M1	642	6.29753	0	0
RUNDC3B	11503	-5.98763	0	0		COMMD9	2746	6.29429	0	0
BAK1	1169	-5.98942	0	0		RSPO4	11464	6.28952	0	0
ANKRD37	586	-5.98986	0	0		NT5DC2	9013	6.28644	0	0
ATP4A	1022	-5.99403	0	0		EDARADD	3743	6.28423	0	0
LURAP1L	7490	-5.99763	0	0		HTR2C	5875	6.27944	0	0
UBAP1	14286	-6.00427	0	0		NR2E1	8942	6.27636	0	0
PXDN	10647	-6.0043	0	0		KCNK1	6385	6.27103	0	0
SMOC2	12406	-6.00634	0	0		THNSL2	13393	6.27052	0	0
PARGP1	9397	-6.00974	0	0		COPZ1	2767	6.26974	0	0
C2orf68	1595	-6.00999	0	0		RARS	10844	6.26953	0	0
MYH7B	8396	-6.01073	0	0		TRIM71	14015	6.26623	0	0
KCNK10	6386	-6.01155	0	0		ATP6V1H	1063	6.26584	0	0
DLGAP1-AS4	3436	-6.01822	0	0		MAPK1	7650	6.26555	0	0
TSC22D1	14077	-6.02085	0	0		DIAPH2	3393	6.26546	0	0
ZNF782	15530	-6.02623	0	0		SYT10	13050	6.26362	0	0
INSM2	6116	-6.02983	0	0		KIRREL3	6552	6.25945	0	0
ARID2	806	-6.03046	0	0		SQOR	12708	6.25513	0	0
PDE10A	9555	-6.03175	0	0		TMEM238	13653	6.25288	0	0
GADD45B	4842	-6.03375	0	0		ISLR2	6196	6.25124	0	0
MRPL35	8177	-6.03499	0	0		ICE1	5911	6.25065	0	0
SERTAD4	11828	-6.03604	0	0		VPS37C	14623	6.24996	0	0
TMF1	13740	-6.0365	0	0		CDH11	2169	6.24704	0	0
BRINP2	1367	-6.03669	0	0		LMO1	7091	6.24202	0	0
MIER1	7964	-6.03676	0	0		LINC00839	6968	6.24064	0	0
MLPH	8032	-6.03706	0	0		CCNA1	2021	6.23112	0	0
HIST1H1E	5622	-6.03732	0	0		ATP5ME	1032	6.23003	0	0
NGLY1	8746	-6.03786	0	0		GAR1	4885	6.22953	0	0
DHX40	3386	-6.03926	0	0		C5orf30	1630	6.22745	0	0
MGARP	7918	-6.04325	0	0		SND1	12442	6.22687	0	0
DCAF16	3186	-6.04635	0	0		EGR3	3807	6.2214	0	0
MTFR1	8295	-6.04645	0	0		ZNF710-AS1	15481	6.21801	0	0
PPFIA1	10167	-6.04754	0	0		CNIH3	2628	6.21601	0	0
NBPF11	8539	-6.04925	0	0		TMEM107	13535	6.20536	0	0
HIST1H4A	5655	-6.05008	0	0		FGFBP3	4563	6.20348	0	0
UST	14522	-6.05057	0	0		HSD17B6	5832	6.20075	0	0
MFSD9	7916	-6.05141	0	0		PSME2	10517	6.19966	0	0
BRICD5	1365	-6.05186	0	0		GPNMB	5211	6.19627	0	0
DPM3	3586	-6.05314	0	0		GUK1	5410	6.19475	0	0
KCNH6	6366	-6.05617	0	0		KRT17	6668	6.19281	0	0
LOC283788	7237	-6.05673	0	0		PGRMC1	9710	6.19205	0	0
BEND7	1256	-6.0625	0	0		CNTN3	2665	6.19021	0	0
RRN3P3	11437	-6.06288	0	0		SARDH	11580	6.18459	0	0
ZBTB8OS	14944	-6.06914	0	0		PKIB	9869	6.18008	0	0
DNAJC4	3512	-6.06985	0	0		PIPSL	9846	6.17641	0	0
BHLHE22	1272	-6.07246	0	0		MZT2A	8449	6.17353	0	0
SENP1	11778	-6.07728	0	0		SQLE	12707	6.17217	0	0
CBWD1	1881	-6.08065	0	0		DHCR24	3352	6.1676	0	0
PCP4	9525	-6.08516	0	0		LRRC73	7428	6.16713	0	0
RBAK	10883	-6.08517	0	0		MRPS16	8207	6.165	0	0
LOC105370333	7207	-6.08685	0	0		TNIK	13794	6.16314	0	0
ANKRD16	555	-6.08999	0	0		IFT27	5973	6.16215	0	0
DBR1	3174	-6.09068	0	0		COPS9	2766	6.15842	0	0
CA12	1689	-6.09346	0	0		CYP4Z1	3120	6.1555	0	0
LATS1	6798	-6.0981	0	0		DLL3	3443	6.15237	0	0
ANAPC4	522	-6.09987	0	0		LRRC56	7418	6.15201	0	0
TWNK	14237	-6.10037	0	0		NTSR2	9032	6.1467	0	0
SEPT6	11795	-6.10396	0	0		LOC101927318	7174	6.12519	0	0
RCC2	10956	-6.10452	0	0		DCAF15	3185	6.12278	0	0
TRRAP	14071	-6.11053	0	0		DUSP3	3669	6.12254	0	0
DDX3X	3265	-6.11521	0	0		MYOM2	8436	6.12158	0	0
GAPVD1	4884	-6.11958	0	0		STIM1	12866	6.1209	0	0
TPRKB	13901	-6.12099	0	0		SLC29A4	12150	6.11525	0	0
DCP1A	3209	-6.12215	0	0		SGSM2	11899	6.11366	0	0
COL13A1	2700	-6.12331	0	0		LINC00484	6944	6.11298	0	0
RGPD3	11052	-6.12973	0	0		GNG12	5116	6.11261	0	0
LEAP2	6846	-6.13002	0	0		CA4	1693	6.11151	0	0
DUSP1	3655	-6.13051	0	0		MYH15	8393	6.1106	0	0
RCOR3	10965	-6.14159	0	0		MDK	7784	6.10695	0	0
PCGF1	9501	-6.14564	0	0		FIG4	4586	6.1013	0	0
C2CD3	1581	-6.14733	0	0		SLC39A10	12214	6.09996	0	0
NUTM2B-AS1	9096	-6.14777	0	0		PRSS2	10450	6.09982	0	0
HSF4	5840	-6.14977	0	0		LOC729970	7321	6.09654	0	0
BMS1P1	1318	-6.15013	0	0		JAKMIP1	6266	6.09592	0	0
CAPN7	1802	-6.15468	0	0		B4GALT5	1141	6.09279	0	0
TAS2R10	13142	-6.15515	0	0		SMIM27	12392	6.09252	0	0
MYNN	8412	-6.1628	0	0		RNF167	11205	6.09238	0	0
SP9	12586	-6.16373	0	0		GRM8	5331	6.09027	0	0
SERPINB9	11817	-6.16674	0	0		SSR4P1	12785	6.08603	0	0
ZNF487	15311	-6.16855	0	0		LOC101060391	7169	6.08554	0	0
TUG1	14224	-6.16868	0	0		MIR99AHG	7998	6.08131	0	0
GSE1	5344	-6.16929	0	0		MAGEH1	7566	6.06911	0	0
RALGAPB	10799	-6.1703	0	0		C3orf80	1618	6.06836	0	0
DLG5	3434	-6.17414	0	0		RGS20	11066	6.06062	0	0
IL6R	6054	-6.17506	0	0		PSMC1	10495	6.05929	0	0
PPIL3	10188	-6.17975	0	0		TP53TG1	13871	6.05434	0	0
LRRC4	7407	-6.18199	0	0		NUPR1	9092	6.0541	0	0
RABEP2	10754	-6.18864	0	0		ABHD12B	65	6.05312	0	0
STOX2	12902	-6.19014	0	0		TIMM50	13439	6.04899	0	0
SLC25A12	12090	-6.19524	0	0		TBPL1	13213	6.04804	0	0
ROCK1	11262	-6.19935	0	0		C19orf70	1512	6.0472	0	0
NIPA1	8767	-6.20611	0	0		DENND1A	3302	6.04647	0	0
CEMIP	2269	-6.21314	0	0		ADGRA3	260	6.04361	0	0
FAM20A	4317	-6.21521	0	0		CHRNB1	2450	6.04313	0	0
FAM135B	4244	-6.21633	0	0		MAGIX	7572	6.04285	0	0
NFATC3	8718	-6.21679	0	0		CD52	2110	6.03918	0	0
HSPB2	5859	-6.21791	0	0		FTL	4754	6.034	0	0
PPP1CC	10210	-6.21823	0	0		LAMB1	6762	6.02695	0	0
ZFYVE19	15051	-6.21919	0	0		SEC24D	11728	6.02085	0	0
CEP120	2292	-6.21979	0	0		MZT2B	8450	6.01744	0	0
PINX1	9834	-6.21982	0	0		SNX10	12496	6.01678	0	0
REEP2	10982	-6.23019	0	0		COL16A1	2701	6.01622	0	0
ZSWIM4	15617	-6.23099	0	0		TMEM136	13564	6.01385	0	0
TPTE2P6	13913	-6.23132	0	0		DENR	3316	6.00235	0	0
ZBTB21	14918	-6.23177	0	0		TRMT10C	14033	5.99539	0	0
TDRD3	13282	-6.2334	0	0		NELL2	8685	5.9935	0	0
LRRC17	7388	-6.23692	0	0		ZMAT2	15077	5.99231	0	0
CRABP1	2851	-6.24335	0	0		RAB32	10716	5.98863	0	0
MTHFD2L	8302	-6.24496	0	0		VAMP8	14546	5.98562	0	0
SENP7	11783	-6.24769	0	0		GSTM1	5358	5.97525	0	0
FAM76B	4377	-6.248	0	0		KIAA0368	6476	5.97432	0	0
ZNF496	15317	-6.25056	0	0		LOC102724156	7203	5.97374	0	0
LINC02210	7052	-6.25096	0	0		ARHGAP25	756	5.97042	0	0
NPAT	8891	-6.25103	0	0		CDYL2	2245	5.96697	0	0
TYW1B	14266	-6.25171	0	0		VSIG4	14643	5.96085	0	0
RSRC1	11466	-6.25411	0	0		GXYLT2	5419	5.96066	0	0
MID2	7959	-6.26728	0	0		SH2B3	11905	5.95765	0	0
CPSF1	2837	-6.26736	0	0		KLF10	6562	5.95734	0	0
GPR108	5213	-6.27097	0	0		NUDT2	9056	5.95441	0	0
PPP4R3A	10271	-6.27566	0	0		FAS	4429	5.94991	0	0
N4BP2L2	8454	-6.27636	0	0		GS1-124K5.4	5340	5.9494	0	0
PATE2	9420	-6.284	0	0		B4GAT1	1144	5.94787	0	0
TRMT61B	14045	-6.28514	0	0		BEND5	1254	5.94779	0	0
SGO2	11893	-6.2854	0	0		SPRY1	12684	5.94365	0	0
MCTS1	7772	-6.28632	0	0		CYP26A1	3100	5.93884	0	0
IGFBP2	5991	-6.28764	0	0		SLC4A3	12249	5.93133	0	0
FBN1	4449	-6.29038	0	0		RSPO3	11463	5.92593	0	0
C20orf96	1569	-6.29187	0	0		LYRM2	7518	5.92476	0	0
LOC652276	7300	-6.29961	0	0		ACOX2	139	5.92263	0	0
MIB2	7946	-6.30064	0	0		ACTN2	174	5.92245	0	0
ZCCHC10	14967	-6.30102	0	0		ALDH9A1	442	5.91673	0	0
DCAF8L2	3193	-6.30252	0	0		ONECUT1	9162	5.91341	0	0
MYO15A	8414	-6.30335	0	0		RNASET2	11169	5.90793	0	0
PRR16	10424	-6.31614	0	0		COL5A2	2718	5.90396	0	0
PSMD6	10512	-6.31637	0	0		GLCE	5041	5.90332	0	0
HELQ	5548	-6.32063	0	0		PDE4C	9566	5.90165	0	0
CNTRL	2675	-6.32344	0	0		PON3	10131	5.89166	0	0
FAM43A	4354	-6.32561	0	0		STK17A	12873	5.89049	0	0
UNKL	14426	-6.32617	0	0		CALHM6	1756	5.8896	0	0
SLC9A5	12297	-6.32651	0	0		BDNF	1247	5.88941	0	0
AFF1	314	-6.32905	0	0		FAM241B	4345	5.88701	0	0
TRMO	14029	-6.33026	0	0		LOC101927420	7175	5.88449	0	0
TRMT2B	14040	-6.33095	0	0		NBAS	8531	5.88348	0	0
ABCB7	40	-6.3386	0	0		CDC40	2147	5.88208	0	0
BTBD11	1390	-6.34487	0	0		RAB3GAP1	10729	5.87843	0	0
ASTE1	942	-6.34882	0	0		SERPINB8	11816	5.87611	0	0
AGO3	343	-6.35373	0	0		LAMTOR2	6773	5.87209	0	0
ZNF34	15229	-6.35438	0	0		SEMA6B	11773	5.86902	0	0
ADAM23	209	-6.35459	0	0		LINC01750	7037	5.86658	0	0
WHAMMP3	14769	-6.35706	0	0		CPLX3	2822	5.86461	0	0
KIAA1109	6488	-6.35728	0	0		PTGR2	10561	5.85434	0	0
ERCC4	4051	-6.3575	0	0		GRP	5333	5.85401	0	0
EWSR1	4127	-6.36214	0	0		LOC105378853	7221	5.85208	0	0
SPACA6	12589	-6.36528	0	0		FARSB	4428	5.85183	0	0
GTF3C2	5390	-6.36727	0	0		WNT7B	14793	5.84944	0	0
ZNF10	15096	-6.37318	0	0		ZDHHC23	14998	5.84685	0	0
PKD2L2	9866	-6.37913	0	0		ECHS1	3734	5.84451	0	0
SDR16C5	11704	-6.38148	0	0		FBXL18	4458	5.84355	0	0
ZNF195	15138	-6.38451	0	0		FABP5P3	4186	5.84296	0	0
YPEL4	14876	-6.38698	0	0		YTHDF2	14882	5.84153	0	0
ZNF273	15188	-6.38796	0	0		ARRB2	870	5.84136	0	0
ZNF510	15323	-6.39015	0	0		SNTB1	12488	5.83048	0	0
CHD2	2394	-6.39527	0	0		FGD3	4544	5.8302	0	0
ZNF662	15439	-6.39955	0	0		APMAP	689	5.83001	0	0
MBL1P	7726	-6.40078	0	0		UBXN8	14368	5.82808	0	0
SETDB1	11846	-6.40172	0	0		FUT9	4779	5.82754	0	0
TRIP4	14024	-6.40262	0	0		ADIRF	280	5.82631	0	0
BHLHE40	1274	-6.403	0	0		WNT4	14788	5.81654	0	0
NBPF10	8538	-6.40967	0	0		HADH	5451	5.81223	0	0
IGF1R	5985	-6.41114	0	0		ARHGDIA	778	5.81203	0	0
ADAM22	208	-6.41139	0	0		LASP1	6795	5.81161	0	0
FAM210B	4320	-6.41151	0	0		FAM174B	4280	5.80837	0	0
PATJ	9422	-6.41337	0	0		GAL	4846	5.80682	0	0
TAS2R50	13154	-6.4196	0	0		STEAP1	12861	5.80178	0	0
SLC38A9	12212	-6.41987	0	0		SLC44A3	12235	5.7954	0	0
PDZD8	9625	-6.42339	0	0		SYT5	13061	5.79378	0	0
CHST12	2455	-6.43149	0	0		ADAMTS8	225	5.79342	0	0
RAB11B	10690	-6.43602	0	0		STRAP	12907	5.79264	0	0
ZNF383	15247	-6.44169	0	0		RNF5P1	11243	5.79196	0	0
C4orf3	1621	-6.44409	0	0		KCTD10	6417	5.79091	0	0
ZNF417	15265	-6.44556	0	0		LOC101928111	7185	5.7899	0	0
PKD1P6-NPIPP1	9863	-6.45099	0	0		SWI5	13004	5.78754	0	0
ARHGEF18	789	-6.45198	0	0		KRT83	6680	5.78742	0	0
MAPKBP1	7672	-6.4577	0	0		PITPNM2	9855	5.7839	0	0
STK26	12878	-6.45968	0	0		SYTL2	13065	5.78277	0	0
TDRD1	13280	-6.46113	0	0		CDC16	2138	5.78089	0	0
MROH8	8152	-6.46394	0	0		LINC01094	6994	5.77816	0	0
CDK14	2198	-6.46513	0	0		OAF	9115	5.77743	0	0
FRMD4A	4727	-6.46825	0	0		GSTO2	5365	5.77527	0	0
ADCY9	252	-6.47074	0	0		WLS	14779	5.77367	0	0
LOC401357	7263	-6.47293	0	0		TUBA4A	14201	5.77002	0	0
SND1-IT1	12443	-6.47637	0	0		RABAC1	10752	5.76818	0	0
CCDC130	1917	-6.48791	0	0		CDC34	2144	5.76337	0	0
GFM1	4964	-6.48815	0	0		COPS4	2760	5.75716	0	0
OR2L8	9200	-6.49	0	0		DUSP28	3668	5.75649	0	0
FAM57B	4367	-6.49212	0	0		GTF2H5	5382	5.74965	0	0
DYNC2H1	3690	-6.49609	0	0		UROS	14459	5.74894	0	0
C9orf3	1679	-6.49745	0	0		DDN	3242	5.74824	0	0
TAF4B	13104	-6.50187	0	0		CXCL14	3054	5.74759	0	0
SRRM3	12749	-6.50199	0	0		DRAM1	3612	5.74095	0	0
DPY19L1P1	3596	-6.50314	0	0		TMEM70	13717	5.74038	0	0
TAS2R13	13143	-6.50464	0	0		CA11	1688	5.7398	0	0
HERPUD1	5565	-6.50618	0	0		ST5	12810	5.73976	0	0
SETD6	11843	-6.50659	0	0		PTPRR	10609	5.73932	0	0
KIF27	6533	-6.50669	0	0		IGSF22	6008	5.73802	0	0
BRWD3	1379	-6.50924	0	0		SH3KBP1	11926	5.73393	0	0
CDK13	2197	-6.51217	0	0		ZSCAN5A	15613	5.73355	0	0
NELFA	8680	-6.51385	0	0		RMI2	11156	5.7297	0	0
PTPRD-AS1	10598	-6.51462	0	0		C1orf194	1544	5.72527	0	0
IER2	5932	-6.51536	0	0		SH3GL3	11923	5.7211	0	0
RASA3	10848	-6.51584	0	0		ENDOU	3958	5.71514	0	0
EXOG	4143	-6.52714	0	0		HRK	5808	5.71455	0	0
MBP	7735	-6.52779	0	0		SLC27A2	12142	5.71401	0	0
SF3B1	11857	-6.52785	0	0		DNAH2	3472	5.70042	0	0
SCX	11677	-6.53027	0	0		PRICKLE2	10329	5.69974	0	0
ATXN7	1088	-6.53303	0	0		SAMD9	11566	5.69511	0	0
TBL1Y	13209	-6.53329	0	0		FCGBP	4511	5.6946	0	0
KCNA1	6339	-6.53674	0	0		METAP1	7857	5.69428	0	0
ARHGEF11	784	-6.53796	0	0		SNRPD3	12483	5.68687	0	0
ZBTB43	14932	-6.54718	0	0		C22orf39	1577	5.67963	0	0
FKBP7	4608	-6.5501	0	0		CHRNA4	2447	5.67796	0	0
NME5	8825	-6.55291	0	0		CLDN10	2526	5.67739	0	0
CEP97	2324	-6.56045	0	0		CCDC6	1971	5.67553	0	0
MYO19	8418	-6.5644	0	0		MEGF9	7839	5.67477	0	0
ANKRD13A	551	-6.5656	0	0		PLCH1	9916	5.67394	0	0
ABCB9	42	-6.56589	0	0		KCTD6	6432	5.66997	0	0
AMD1	489	-6.56674	0	0		TOLLIP	13827	5.66725	0	0
RNLS	11251	-6.56858	0	0		YIPF1	14862	5.66505	0	0
ABCA7	34	-6.57008	0	0		LRSAM1	7449	5.66475	0	0
LOC285074	7240	-6.57009	0	0		GRM3	5327	5.66206	0	0
FGF18	4555	-6.57069	0	0		SCRG1	11667	5.66095	0	0
ATP6V0A2	1045	-6.57158	0	0		SELENOT	11753	5.6589	0	0
ASAH2	891	-6.57356	0	0		MYRIP	8443	5.65714	0	0
DNA2	3465	-6.57672	0	0		LRRN1	7442	5.65478	0	0
MAP2K3	7617	-6.57986	0	0		XKR4	14820	5.65062	0	0
CYTH3	3130	-6.58224	0	0		ACP1	141	5.64839	0	0
TAS2R43	13151	-6.58459	0	0		CIB2	2478	5.64672	0	0
RAD54B	10782	-6.59113	0	0		TRAPPC6A	13954	5.64444	0	0
KIF15	6517	-6.59547	0	0		LYN	7506	5.64377	0	0
FAM49B	4361	-6.59593	0	0		CCDC110	1903	5.64197	0	0
ERICH5	4069	-6.59891	0	0		CRYZL1	2922	5.64167	0	0
ANKRD26	571	-6.60216	0	0		BCL11B	1218	5.64114	0	0
CRISPLD1	2887	-6.60373	0	0		ASGR2	918	5.64096	0	0
SEC31A	11729	-6.60426	0	0		S100A16	11530	5.63881	0	0
CCDC57	1968	-6.60499	0	0		CREG2	2875	5.63337	0	0
PKNOX2	9876	-6.60656	0	0		RNF175	11209	5.63045	0	0
RORB	11271	-6.61053	0	0		ADCYAP1	253	5.62825	0	0
PHF3	9736	-6.61265	0	0		ACO2	130	5.62559	0	0
MAN2A2	7595	-6.6243	0	0		WIZ	14778	5.62174	0	0
MAP4K2	7639	-6.63046	0	0		VPS26B	14614	5.62146	0	0
ANKS6	604	-6.63314	0	0		NDUFA11	8601	5.61791	0	0
NXPH3	9107	-6.63626	0	0		ARHGAP6	776	5.61647	0	0
GPHN	5201	-6.64132	0	0		UBE2B	14293	5.61224	0	0
KDM4C	6449	-6.64504	0	0		FAM213A	4323	5.60952	0	0
HECW1	5543	-6.64534	0	0		TNFAIP8L2	13774	5.60663	0	0
HCN2	5499	-6.64695	0	0		CDC6	2160	5.60482	0	0
WNT3	14787	-6.65067	0	0		CAPRIN1	1805	5.60124	0	0
CROCCP2	2898	-6.65124	0	0		PCLO	9509	5.59436	0	0
PCDHGB2	9492	-6.65201	0	0		ENKUR	3964	5.59295	0	0
PPP3CC	10265	-6.65284	0	0		ALDH6A1	439	5.5875	0	0
ATP13A3	1004	-6.65802	0	0		LINC02361	7055	5.58545	0	0
COL5A1	2717	-6.66477	0	0		GABRA2	4827	5.58448	0	0
NKX3-1	8801	-6.66673	0	0		LOC389895	7253	5.58388	0	0
KLHDC1	6577	-6.67872	0	0		SGSM1	11898	5.5828	0	0
ZNF714	15484	-6.6831	0	0		CBLN2	1875	5.58049	0	0
ISCA1	6188	-6.68393	0	0		SLC40A1	12227	5.57892	0	0
ZNF641	15427	-6.68407	0	0		ZNF883	15575	5.57165	0	0
ZC3H10	14948	-6.68446	0	0		WDR17	14700	5.56547	0	0
HCG4	5494	-6.68448	0	0		TMEM234	13650	5.56404	0	0
PER1	9647	-6.69102	0	0		DPP10-AS1	3588	5.56279	0	0
JAK1	6263	-6.69191	0	0		CYB561	3070	5.56043	0	0
SLC35A4	12177	-6.69471	0	0		LOC100507351	7159	5.55894	0	0
DXO	3682	-6.69681	0	0		SLIRP	12315	5.55518	0	0
NKX1-2	8795	-6.69776	0	0		FADS2	4191	5.55219	0	0
RSAD2	11450	-6.69782	0	0		TLL1	13473	5.55034	0	0
STAC2	12827	-6.6981	0	0		RAB10	10688	5.5499	0	0
LOC440311	7269	-6.69996	0	0		RNF139	11191	5.54891	0	0
SLC24A2	12083	-6.7001	0	0		OAZ3	9122	5.54869	0	0
ZNF287	15204	-6.70654	0	0		ITGB1BP1	6225	5.54854	0	0
LOC100294145	7142	-6.71431	0	0		GNB1L	5108	5.54778	0	0
KNG1	6642	-6.71787	0	0		KIAA1191	6491	5.53875	0	0
REPIN1	10997	-6.72269	0	0		RAB22A	10704	5.53723	0	0
ANKS3	603	-6.72344	0	0		SORBS2	12541	5.53174	0	0
TMEM229B	13645	-6.72593	0	0		GPD2	5197	5.53153	0	0
TTC39C	14162	-6.7263	0	0		C17orf58	1491	5.52966	0	0
ARC	726	-6.72728	0	0		LOC644936	7294	5.52803	0	0
CCDC186	1950	-6.7275	0	0		ERI3	4065	5.52655	0	0
CABP1	1706	-6.72792	0	0		CCL28	2018	5.5234	0	0
CLVS2	2598	-6.73402	0	0		SLC2A12	12154	5.51972	0	0
RBM15	10903	-6.73473	0	0		FZD9	4802	5.51804	0	0
OGFOD2	9141	-6.73987	0	0		RGS22	11067	5.51669	0	0
ADAMTS13	218	-6.7424	0	0		PTS	10617	5.51577	0	0
ADM	282	-6.74274	0	0		SERPINB2	11814	5.51346	0	0
LRRC55	7417	-6.74762	0	0		PRDM16	10304	5.51214	0	0
OR2L3	9199	-6.74981	0	0		CYP4X1	3119	5.51078	0	0
YARS	14849	-6.75028	0	0		LOC101930085	7197	5.50748	0	0
PKD1	9862	-6.75582	0	0		RUBCNL	11497	5.50683	0	0
P2RX6	9304	-6.75616	0	0		FBXL2	4460	5.5035	0	0
NEB	8650	-6.75701	0	0		ATOX1	995	5.50173	0	0
CHIC1	2410	-6.75952	0	0		KIF17	6519	5.50033	0	0
IGDCC3	5982	-6.76038	0	0		CLCN6	2523	5.49429	0	0
DND1	3527	-6.76245	0	0		GNAZ	5106	5.4928	0	0
RMND5A	11158	-6.76398	0	0		NRDC	8961	5.4926	0	0
NFATC2IP	8717	-6.76457	0	0		RETREG1	11009	5.49209	0	0
VPS54	14634	-6.76619	0	0		EPHX1	4021	5.49155	0	0
ZNF33A	15227	-6.77963	0	0		RAB11A	10689	5.49127	0	0
TRIM13	13972	-6.77988	0	0		INSM1	6115	5.48972	0	0
ZNF250	15173	-6.78561	0	0		CHRM3	2441	5.4886	0	0
SNRNP35	12472	-6.78646	0	0		ZFYVE21	15052	5.48794	0	0
PAXIP1	9433	-6.78677	0	0		P2RY6	9312	5.48776	0	0
HNRNPR	5761	-6.78716	0	0		CYP51A1	3121	5.48644	0	0
EIF5A2	3872	-6.78824	0	0		ENO1	3965	5.4837	0	0
PRIM1	10332	-6.79045	0	0		APRT	709	5.48155	0	0
FLT3	4637	-6.79321	0	0		BORCS5	1338	5.47743	0	0
TARDBP	13136	-6.79488	0	0		MINOS1	7979	5.4765	0	0
MIS18BP1	8002	-6.80126	0	0		NR1H3	8938	5.47589	0	0
PAN2	9366	-6.80193	0	0		PINLYP	9833	5.47487	0	0
TBC1D16	13172	-6.80386	0	0		LINC01296	7013	5.47285	0	0
KBTBD3	6333	-6.80951	0	0		TBC1D14	13170	5.46897	0	0
RP9	11274	-6.81054	0	0		KXD1	6738	5.46842	0	0
TNFRSF25	13785	-6.81355	0	0		GRID2	5304	5.46816	0	0
PJVK	9861	-6.81424	0	0		CALM1	1757	5.46807	0	0
DGCR8	3339	-6.81442	0	0		MED8	7826	5.465	0	0
FAM120C	4227	-6.81687	0	0		PLIN5	9965	5.46198	0	0
MMP15	8045	-6.81979	0	0		CD200	2082	5.46168	0	0
TCTN2	13275	-6.81991	0	0		RAB15	10699	5.45585	0	0
MEIKIN	7842	-6.8255	0	0		STAT6	12856	5.45513	0	0
POU3F3	10147	-6.82961	0	0		PON2	10130	5.44716	0	0
FGF7	4558	-6.83084	0	0		RAB3D	10728	5.44608	0	0
ALX3	485	-6.83205	0	0		HSPB1	5857	5.44541	0	0
ZNF446	15290	-6.83253	0	0		LIX1L	7072	5.43941	0	0
CCDC181	1948	-6.83282	0	0		PLPP3	9980	5.43664	0	0
C8orf31	1659	-6.83298	0	0		UQCR11	14442	5.43646	0	0
CDS1	2239	-6.83375	0	0		NOL4L	8852	5.43168	0	0
HIST4H4	5673	-6.83453	0	0		LOC105374952	7214	5.43059	0	0
LY6G5B	7496	-6.83837	0	0		ASB6	907	5.42949	0	0
KCNH4	6364	-6.83956	0	0		ABHD1	61	5.42647	0	0
CTTNBP2	3020	-6.84371	0	0		PSME1	10516	5.42597	0	0
BACH2	1155	-6.84659	0	0		SLC39A3	12219	5.42515	0	0
SAV1	11593	-6.84829	0	0		TNFAIP2	13770	5.42487	0	0
ODF2L	9133	-6.85355	0	0		PGM1	9704	5.42376	0	0
TRERF1	13961	-6.85536	0	0		LSP1	7469	5.42008	0	0
SKIDA1	12006	-6.85919	0	0		SLCO2A1	12305	5.41814	0	0
ZNF354B	15238	-6.85984	0	0		MCHR1	7751	5.41568	0	0
WDR90	14749	-6.86567	0	0		ARRB1	869	5.41488	0	0
SPECC1	12629	-6.87324	0	0		IMPACT	6074	5.41467	0	0
PIK3CB	9815	-6.87804	0	0		LOC645166	7295	5.41355	0	0
LNX2	7103	-6.88056	0	0		KRT86	6682	5.4075	0	0
EFR3A	3795	-6.88743	0	0		C16orf58	1479	5.40685	0	0
ABHD17B	72	-6.9096	0	0		EHBP1L1	3810	5.40291	0	0
FKBP5	4607	-6.91136	0	0		MRPL28	8171	5.40289	0	0
LNPEP	7100	-6.91434	0	0		CHPF2	2434	5.40284	0	0
LEO1	6855	-6.92146	0	0		TEK	13298	5.40172	0	0
STRN	12911	-6.92333	0	0		DMGDH	3453	5.39956	0	0
KAT6B	6319	-6.92957	0	0		ALDH1L1	432	5.39849	0	0
BMS1P4	1322	-6.93174	0	0		TRIB1	13966	5.39394	0	0
PLK5	9969	-6.93532	0	0		TAC3	13079	5.39281	0	0
PIP5KL1	9844	-6.9367	0	0		ANXA11	626	5.39201	0	0
PPP1R16B	10224	-6.94089	0	0		MPHOSPH6	8103	5.38784	0	0
UTRN	14533	-6.94314	0	0		ITPRIPL2	6248	5.38724	0	0
RASGRF1	10858	-6.94353	0	0		CDKN2AIPNL	2229	5.38426	0	0
OSGEPL1	9262	-6.9447	0	0		GPR88	5265	5.3752	0	0
TMEM127	13552	-6.94536	0	0		DNAJC5	3513	5.37286	0	0
MPZL3	8127	-6.94773	0	0		TPI1	13884	5.36977	0	0
KLHL24	6596	-6.95524	0	0		ZNF727	15493	5.3682	0	0
USP28	14486	-6.95549	0	0		ITFG1	6207	5.36777	0	0
RNF113A	11178	-6.95627	0	0		CERS6	2333	5.36693	0	0
SFI1	11863	-6.95892	0	0		CCT7	2068	5.36544	0	0
LYPD5	7511	-6.96157	0	0		LOC101927027	7172	5.36524	0	0
FANCI	4415	-6.96756	0	0		NHLRC1	8749	5.36256	0	0
UNC13C	14413	-6.97064	0	0		TOMM5	13837	5.36089	0	0
REEP6	10986	-6.971	0	0		RPL39L	11344	5.36019	0	0
SKA2	12002	-6.97348	0	0		TIMM13	13430	5.35987	0	0
HERC3	5561	-6.97457	0	0		OLFM4	9152	5.35543	0	0
TAP1	13128	-6.97796	0	0		LRMDA	7368	5.35443	0	0
PRPF4B	10407	-6.98233	0	0		TMEM230	13646	5.34961	0	0
KRBA1	6655	-6.98485	0	0		RABIF	10761	5.34907	0	0
SMCHD1	12364	-6.99113	0	0		RGS18	11063	5.34837	0	0
CASP3	1846	-6.99574	0	0		MFSD4A	7910	5.34663	0	0
GSTT1	5367	-6.9966	0	0		HMGB1	5714	5.34236	0	1e-06
PIGC	9791	-6.99978	0	0		OLFM3	9151	5.33981	0	1e-06
RBM7	10930	-7.00365	0	0		SAMD14	11560	5.33614	0	1e-06
EMILIN3	3939	-7.00835	0	0		TMEM106A	13532	5.33431	0	1e-06
TPTE2P1	13910	-7.01882	0	0		AZIN1	1112	5.33431	0	1e-06
SEC62	11735	-7.02065	0	0		CAPG	1793	5.33343	0	1e-06
CCDC88B	1994	-7.0323	0	0		SEMA4A	11764	5.33153	0	1e-06
HSBP1L1	5820	-7.03372	0	0		TP53I3	13867	5.32805	0	1e-06
RGL2	11047	-7.03776	0	0		PFN2	9685	5.32677	0	1e-06
MAX	7716	-7.04031	0	0		COA6	2681	5.3247	0	1e-06
FAM13A-AS1	4248	-7.04777	0	0		KIF3C	6538	5.31319	0	1e-06
EHMT1	3815	-7.05079	0	0		TMEM9B	13739	5.3118	0	1e-06
PCDHB11	9474	-7.05185	0	0		CASP1	1842	5.31026	0	1e-06
SHMT1	11953	-7.05508	0	0		ELL3	3894	5.30896	0	1e-06
STRBP	12908	-7.05646	0	0		MFSD12	7902	5.30792	0	1e-06
ZNF354C	15239	-7.05783	0	0		SF3B6	11862	5.30673	0	1e-06
TENM2	13304	-7.06162	0	0		RUNDC1	11501	5.30623	0	1e-06
RAB40AL	10734	-7.06348	0	0		RXFP1	11516	5.30526	0	1e-06
PIDD1	9784	-7.06356	0	0		ZC3H15	14955	5.30246	0	1e-06
FLJ23867	4620	-7.06711	0	0		ASXL3	948	5.29497	0	1e-06
SLC39A8	12223	-7.06851	0	0		SNX32	12517	5.29477	0	1e-06
EDNRA	3752	-7.06973	0	0		PSEN2	10473	5.2929	0	1e-06
ARHGAP9	777	-7.07414	0	0		MARC2	7678	5.29078	0	1e-06
RALGAPA2	10798	-7.0746	0	0		PALMD	9363	5.28959	0	1e-06
TRMT11	14034	-7.07538	0	0		MPI	8106	5.28796	0	1e-06
TTBK2	14135	-7.07824	0	0		CCDC103	1900	5.28614	0	1e-06
MADCAM1	7546	-7.0791	0	0		FABP5	4185	5.27743	0	1e-06
ZNF8	15542	-7.07962	0	0		JMJD4	6282	5.27722	0	1e-06
GGA2	4976	-7.08493	0	0		OXCT1	9290	5.27531	0	1e-06
LOC728743	7311	-7.08516	0	0		PLTP	9994	5.27512	0	1e-06
LRR1	7383	-7.08971	0	0		DOLK	3566	5.27451	0	1e-06
NHLRC2	8750	-7.09147	0	0		NFATC1	8716	5.27328	0	1e-06
TBC1D4	13191	-7.09669	0	0		ATP8A2	1067	5.27083	0	1e-06
DIP2A	3403	-7.10165	0	0		USP7	14517	5.26889	0	1e-06
MGC16025	7927	-7.10187	0	0		POLR3GL	10114	5.2676	0	1e-06
ZBTB38	14927	-7.10301	0	0		FIP1L1	4592	5.26602	0	1e-06
NRG2	8966	-7.11528	0	0		ARL16	821	5.26397	0	1e-06
RAB24	10706	-7.12198	0	0		CLBA1	2515	5.26209	0	1e-06
MTG1	8297	-7.13011	0	0		TRAPPC5	13953	5.26168	0	1e-06
WDR33	14710	-7.13119	0	0		C6orf118	1637	5.26155	0	1e-06
MICA	7947	-7.13219	0	0		IL1B	6038	5.25743	0	1e-06
TBC1D30	13186	-7.13414	0	0		ARF3	730	5.25642	0	1e-06
ASAH2B	892	-7.137	0	0		HES5	5569	5.25471	0	1e-06
ZFP14	15026	-7.13705	0	0		GABRE	4835	5.24994	0	1e-06
FAM131B	4237	-7.13924	0	0		DUSP6	3673	5.24834	0	1e-06
WDR70	14737	-7.15126	0	0		EARS2	3717	5.24698	0	1e-06
MBD2	7720	-7.15512	0	0		CTR9	3002	5.24688	0	1e-06
LAMA3	6759	-7.15534	0	0		TECPR2	13291	5.24671	0	1e-06
PPIEL	10182	-7.16354	0	0		HSPH1	5868	5.24373	0	1e-06
JMJD1C	6280	-7.16565	0	0		MLC1	8018	5.24352	0	1e-06
RASD2	10854	-7.17105	0	0		SLC30A3	12164	5.2413	0	1e-06
CCDC146	1928	-7.17673	0	0		C16orf89	1485	5.24099	0	1e-06
CCNB1IP1	2023	-7.17803	0	0		FJX1	4597	5.23655	0	1e-06
PVALB	10635	-7.17865	0	0		ATP5MC1	1028	5.23395	0	1e-06
WDR19	14702	-7.18372	0	0		ANO2	608	5.23393	0	1e-06
MIAT	7944	-7.18379	0	0		RRAGC	11427	5.23259	0	1e-06
ADAM9	215	-7.18431	0	0		SNAP29	12429	5.22796	0	1e-06
MAP9	7649	-7.18477	0	0		AP1S1	643	5.22206	0	1e-06
LRCH1	7355	-7.18799	0	0		ATG7	984	5.22183	0	1e-06
SLC38A1	12204	-7.19089	0	0		DHCR7	3353	5.2217	0	1e-06
KIAA1841	6509	-7.20268	0	0		SLC8A2	12290	5.22028	0	1e-06
H1F0	5429	-7.2029	0	0		GPX3	5279	5.21875	0	1e-06
IL17RA	6031	-7.20306	0	0		DOCK9	3557	5.21541	0	1e-06
RBMS1	10932	-7.21461	0	0		CNTN6	2668	5.21298	0	1e-06
PWAR5	10639	-7.21544	0	0		LINC01116	6998	5.21295	0	1e-06
ZNF767P	15515	-7.22017	0	0		MYO16	8416	5.20834	0	1e-06
CSDC2	2929	-7.22197	0	0		TUBA4B	14202	5.20754	0	1e-06
PLCXD1	9920	-7.22387	0	0		TMEM258	13670	5.20604	0	1e-06
RET	11006	-7.22629	0	0		MRPL51	8194	5.20475	0	1e-06
FLT4	4639	-7.22804	0	0		RAB31	10715	5.20228	0	1e-06
DCLRE1C	3207	-7.23845	0	0		CARD16	1814	5.20148	0	1e-06
MCF2L2	7749	-7.24515	0	0		PDZD2	9622	5.20073	0	1e-06
MTBP	8282	-7.24655	0	0		RPL41	11346	5.20034	0	1e-06
DDX19B	3255	-7.24756	0	0		PRDX4	10313	5.19992	0	1e-06
DNAAF2	3466	-7.25004	0	0		EMC3	3924	5.19396	0	1e-06
IFRD2	5967	-7.25206	0	0		EMP3	3948	5.19213	0	1e-06
RRM2B	11435	-7.25688	0	0		DCTD	3215	5.18828	0	1e-06
BEND6	1255	-7.25735	0	0		PITHD1	9850	5.18761	0	1e-06
ZBTB34	14925	-7.26402	0	0		HEPH	5554	5.18616	0	1e-06
CSTF2	2967	-7.26815	0	0		KCNQ2	6406	5.18371	0	1e-06
CCR10	2051	-7.26934	0	0		JUN	6298	5.17622	0	1e-06
TSPAN9	14115	-7.27648	0	0		GSPT2	5352	5.17581	0	1e-06
ZZEF1	15631	-7.28295	0	0		C2orf73	1599	5.17409	0	1e-06
CTPS2	3001	-7.28573	0	0		FAM228B	4340	5.17187	0	1e-06
ZBTB47	14935	-7.29238	0	0		CTH	2988	5.16846	0	1e-06
ANKRD34C	580	-7.29307	0	0		PET100	9653	5.16796	0	1e-06
TSEN2	14082	-7.29394	0	0		FOXG1	4690	5.16573	0	1e-06
HTR1F	5873	-7.29638	0	0		DCP2	3211	5.16545	0	1e-06
KMT2E	6637	-7.29791	0	0		REEP5	10985	5.16217	0	1e-06
ATG16L1	974	-7.30102	0	0		PHLDA2	9748	5.16202	0	1e-06
RDH5	10973	-7.30561	0	0		SCAPER	11620	5.15064	0	1e-06
CEP44	2310	-7.30852	0	0		PEMT	9644	5.14933	0	1e-06
C1orf162	1541	-7.30893	0	0		PELI1	9639	5.14399	0	1e-06
ZNF165	15125	-7.31	0	0		FNBP1L	4657	5.14084	0	1e-06
DENND6A	3314	-7.31602	0	0		MPP2	8112	5.14074	0	1e-06
MRRF	8232	-7.31814	0	0		SYN1	13020	5.13994	0	1e-06
MIR124-2HG	7987	-7.3189	0	0		RPL12	11297	5.13905	0	1e-06
SLC4A9	12253	-7.32043	0	0		ADAP2	232	5.13903	0	1e-06
CACNA1A	1714	-7.32328	0	0		RNASEH2A	11165	5.13614	0	1e-06
FLJ42627	4627	-7.32596	0	0		SFRP1	11869	5.13517	0	1e-06
SEC14L1	11712	-7.32866	0	0		TTC1	14136	5.13281	0	1e-06
VCX2	14570	-7.33189	0	0		SENP2	11779	5.13213	0	1e-06
VPS36	14620	-7.33374	0	0		HDGFL3	5523	5.13188	0	1e-06
AR	721	-7.33569	0	0		PBXIP1	9444	5.13026	0	1e-06
BMS1P2	1320	-7.33943	0	0		RHCG	11086	5.12509	0	2e-06
JAM2	6269	-7.34424	0	0		DIO3	3401	5.12441	0	2e-06
POU6F2	10151	-7.34635	0	0		SIN3B	11984	5.12434	0	2e-06
TGFBR1	13356	-7.35049	0	0		KLHL1	6586	5.12302	0	2e-06
NR1D1	8935	-7.35111	0	0		RTN1	11483	5.1229	0	2e-06
ARL13B	818	-7.35331	0	0		ATL1	987	5.12036	0	2e-06
TBCE	13202	-7.35941	0	0		NOP16	8864	5.1189	0	2e-06
PLXDC1	9996	-7.36143	0	0		SPIN1	12647	5.11849	0	2e-06
AASDH	21	-7.36331	0	0		PHF24	9735	5.11839	0	2e-06
LINC00515	6947	-7.36816	0	0		PDHA1	9587	5.11726	0	2e-06
MRGPRF	8139	-7.37017	0	0		DHX58	3388	5.11462	0	2e-06
KIN	6549	-7.37075	0	0		ARL3	826	5.11316	0	2e-06
RNF165	11204	-7.37397	0	0		CHMP2A	2419	5.1127	0	2e-06
CNOT6L	2647	-7.37494	0	0		LUZP2	7492	5.1125	0	2e-06
DCAF13P3	3184	-7.37614	0	0		FDFT1	4521	5.11105	0	2e-06
GAS6	4896	-7.37732	0	0		NXN	9102	5.11064	0	2e-06
NUP205	9077	-7.39139	0	0		ADGRB2	262	5.10726	0	2e-06
ANKRD29	574	-7.39969	0	0		GHR	4999	5.10723	0	2e-06
RING1	11129	-7.40731	0	0		PLXNC1	10005	5.10502	0	2e-06
SLITRK3	12321	-7.40848	0	0		SPHKAP	12642	5.10381	0	2e-06
ZNF630	15424	-7.41069	0	0		CDK17	2201	5.10273	0	2e-06
ZCCHC8	14979	-7.42524	0	0		PNO1	10045	5.09767	0	2e-06
ZNF740	15504	-7.43999	0	0		GAST	4901	5.09568	0	2e-06
ZBTB16	14913	-7.4405	0	0		ARPC4	863	5.09557	0	2e-06
PILRA	9823	-7.44059	0	0		PTP4A1	10572	5.08999	0	2e-06
BICRAL	1283	-7.44256	0	0		CCNY	2047	5.08806	0	2e-06
BRSK2	1377	-7.44298	0	0		CARTPT	1831	5.08774	0	2e-06
SERTAD4-AS1	11829	-7.44391	0	0		POMGNT2	10124	5.08277	0	2e-06
NSMAF	8995	-7.44698	0	0		DVL1	3679	5.08031	0	2e-06
AHI1	361	-7.44766	0	0		NDUFB8	8634	5.07991	0	2e-06
GPATCH8	5185	-7.46052	0	0		CUL2	3031	5.07869	0	2e-06
IFFO1	5937	-7.46404	0	0		AKAP5	398	5.07612	0	2e-06
MAP2K6	7620	-7.46603	0	0		TMEM17	13594	5.07374	0	2e-06
DACT2	3145	-7.47382	0	0		RPAP3	11283	5.07351	0	2e-06
CCDC78	1983	-7.47847	0	0		GLUD2	5076	5.07322	0	2e-06
CLUHP3	2595	-7.48248	0	0		ANKRD19P	561	5.07214	0	2e-06
LINC-PINT	6920	-7.48275	0	0		C2orf27A	1589	5.06944	0	2e-06
ARMCX4	851	-7.4841	0	0		COL5A3	2719	5.06445	0	2e-06
ZNF407	15259	-7.49283	0	0		PDLIM3	9602	5.06086	0	2e-06
ZNF385A	15249	-7.49288	0	0		RIT2	11145	5.06055	0	2e-06
ARL5A	830	-7.49762	0	0		CREB3	2864	5.05426	0	2e-06
STAG1	12828	-7.50025	0	0		COL11A1	2697	5.05374	0	2e-06
DSCC1	3627	-7.50406	0	0		SHANK1	11933	5.05215	0	2e-06
NAALAD2	8470	-7.50761	0	0		DOK1	3560	5.04733	0	2e-06
USF2	14463	-7.51027	0	0		ZNF229	15161	5.0458	0	2e-06
BHLHE41	1275	-7.51306	0	0		ADM5	283	5.04118	0	2e-06
SLC38A11	12206	-7.51915	0	0		ACTB	163	5.03898	0	2e-06
BUD13	1418	-7.51936	0	0		FAM117A	4220	5.03786	0	2e-06
RSAD1	11449	-7.52564	0	0		ATP6V1G2	1062	5.03777	0	2e-06
PIN4P1	9830	-7.52577	0	0		ELOB	3904	5.03745	0	2e-06
GHRLOS	5002	-7.53203	0	0		LYPLAL1	7516	5.03567	0	2e-06
CEACAM19	2247	-7.53971	0	0		ATP9B	1073	5.03567	0	2e-06
ABTB2	94	-7.54516	0	0		SOWAHD	12555	5.03478	0	2e-06
MORC2-AS1	8080	-7.54554	0	0		SAP30BP	11574	5.03474	0	2e-06
RWDD1	11511	-7.54702	0	0		KIAA1549	6501	5.03465	0	2e-06
SLC12A8	12028	-7.5504	0	0		EDN1	3750	5.03457	0	2e-06
BCO2	1237	-7.5539	0	0		CLCN5	2522	5.03432	0	2e-06
STPG1	12903	-7.55894	0	0		CDC27	2143	5.0315	0	2e-06
KCNC1	6349	-7.57016	0	0		CDC42BPB	2150	5.03023	0	2e-06
FAM35BP	4351	-7.57514	0	0		LTBP4	7481	5.03009	0	2e-06
PTCHD4	10543	-7.58749	0	0		ZRANB3	15596	5.02967	0	2e-06
FBXO9	4500	-7.59351	0	0		PPP2R5C	10260	5.0285	0	2e-06
RAB37	10722	-7.6048	0	0		TRIM22	13979	5.02645	0	2e-06
GAS2	4892	-7.61371	0	0		GJA1	5022	5.02297	1e-06	3e-06
TMCC1	13511	-7.62721	0	0		RAC1	10765	5.02058	1e-06	3e-06
CMPK1	2608	-7.6308	0	0		B4GALT3	1139	5.0204	1e-06	3e-06
UBE2O	14318	-7.63414	0	0		MAFK	7558	5.01765	1e-06	3e-06
TRMT9B	14046	-7.63546	0	0		ME2	7790	5.01716	1e-06	3e-06
FBXO32	4483	-7.64032	0	0		IQCK	6160	5.01646	1e-06	3e-06
SHD	11943	-7.64255	0	0		BLCAP	1292	5.01522	1e-06	3e-06
GLIS1	5052	-7.64769	0	0		RCHY1	10958	5.01456	1e-06	3e-06
SLC16A6	12043	-7.65596	0	0		MPND	8110	5.01184	1e-06	3e-06
P3H3	9315	-7.65723	0	0		GRPR	5336	5.01104	1e-06	3e-06
DDX46	3269	-7.66109	0	0		AP3B2	652	5.01005	1e-06	3e-06
MCM3AP-AS1	7757	-7.66189	0	0		ALK	459	5.00864	1e-06	3e-06
COL7A1	2724	-7.66454	0	0		SEMA3D	11761	5.00676	1e-06	3e-06
GOLGA2P5	5141	-7.66656	0	0		MAPK8IP1P2	7663	5.00543	1e-06	3e-06
HNRNPA1L2	5742	-7.67097	0	0		SELENOI	11746	5.00238	1e-06	3e-06
FAM222B	4337	-7.68592	0	0		TSFM	14085	4.99805	1e-06	3e-06
ZNF555	15357	-7.69181	0	0		SIDT2	11970	4.99706	1e-06	3e-06
DIDO1	3397	-7.69305	0	0		C12orf76	1464	4.99351	1e-06	3e-06
VIPR2	14589	-7.69336	0	0		OAZ2	9121	4.98489	1e-06	3e-06
PCDHGA3	9490	-7.69634	0	0		MARC1	7677	4.98323	1e-06	3e-06
CPLX1	2820	-7.69697	0	0		WDR6	14731	4.9827	1e-06	3e-06
XYLT2	14845	-7.69746	0	0		BCLAF3	1236	4.98223	1e-06	3e-06
NUB1	9034	-7.69793	0	0		C17orf51	1490	4.98023	1e-06	3e-06
RAB11FIP2	10692	-7.70078	0	0		RPL31	11330	4.97991	1e-06	3e-06
PDE4A	9564	-7.70151	0	0		DPM2	3585	4.97836	1e-06	3e-06
CREBZF	2873	-7.70263	0	0		LOC102723665	7200	4.97789	1e-06	3e-06
KLHL20	6593	-7.71524	0	0		GPR22	5245	4.97328	1e-06	3e-06
COG2	2688	-7.71805	0	0		FAM187A	4291	4.97053	1e-06	3e-06
PLCD4	9912	-7.72297	0	0		ATP6V0A4	1046	4.97004	1e-06	3e-06
KIF9-AS1	6545	-7.72998	0	0		HTR3B	5876	4.96759	1e-06	3e-06
NEIL1	8669	-7.74121	0	0		S100A10	11526	4.96483	1e-06	3e-06
RELT	10993	-7.74836	0	0		RAMP1	10805	4.9643	1e-06	3e-06
DPY19L2P2	3599	-7.75039	0	0		SLC27A3	12143	4.96427	1e-06	3e-06
ARHGAP27P1	759	-7.75067	0	0		RELB	10989	4.96347	1e-06	3e-06
AMT	510	-7.75518	0	0		PSMB3	10488	4.96228	1e-06	3e-06
MRS2	8233	-7.75697	0	0		DNASE1L1	3524	4.96214	1e-06	3e-06
TBCEL	13203	-7.76507	0	0		PRKDC	10363	4.95992	1e-06	3e-06
KRIT1	6663	-7.76585	0	0		RESP18	11004	4.95736	1e-06	3e-06
NOP53	8866	-7.77259	0	0		DOLPP1	3567	4.95658	1e-06	3e-06
SYT2	13058	-7.77449	0	0		RHBDF2	11081	4.95363	1e-06	3e-06
PPP1R3D	10238	-7.77496	0	0		YWHAB	14884	4.95277	1e-06	3e-06
PLEKHM2	9955	-7.78785	0	0		LPL	7351	4.95241	1e-06	4e-06
ADD1	255	-7.79644	0	0		UQCRFS1	14447	4.95139	1e-06	4e-06
ANKZF1	605	-7.79848	0	0		ACAA2	96	4.95084	1e-06	4e-06
NPIPA8	8905	-7.80429	0	0		TP53BP1	13863	4.95036	1e-06	4e-06
CLEC16A	2541	-7.80638	0	0		PMPCB	10019	4.94902	1e-06	4e-06
PCDH11X	9458	-7.81794	0	0		ZCCHC17	14971	4.94627	1e-06	4e-06
NFKBIZ	8733	-7.82209	0	0		TMEM184B	13612	4.94433	1e-06	4e-06
PIF1	9787	-7.82592	0	0		DPP10	3587	4.94361	1e-06	4e-06
NOXO1	8886	-7.82659	0	0		GFM2	4965	4.94264	1e-06	4e-06
PRSS56	10460	-7.83421	0	0		TMEM246	13660	4.94227	1e-06	4e-06
DHX35	3382	-7.83428	0	0		NECTIN2	8659	4.94078	1e-06	4e-06
CKMT1B	2507	-7.83779	0	0		CDH4	2182	4.93752	1e-06	4e-06
KBTBD2	6332	-7.84249	0	0		TMEM117	13542	4.93556	1e-06	4e-06
NEGR1	8668	-7.84285	0	0		PARD3	9390	4.93438	1e-06	4e-06
ZNF557	15358	-7.84328	0	0		LOXL3	7338	4.93021	1e-06	4e-06
ABCC8	48	-7.85001	0	0		CKS1B	2510	4.92973	1e-06	4e-06
ZNF670	15446	-7.85017	0	0		APOC1	691	4.92201	1e-06	4e-06
PLCB4	9909	-7.86478	0	0		RAB40B	10735	4.92152	1e-06	4e-06
LINC00476	6942	-7.88064	0	0		FAM129B	4235	4.91924	1e-06	4e-06
MAP3K6	7635	-7.88492	0	0		SERINC1	11805	4.91915	1e-06	4e-06
ESCO1	4086	-7.88705	0	0		GOLT1A	5159	4.91759	1e-06	4e-06
ARSG	881	-7.89981	0	0		DDX54	3276	4.91721	1e-06	4e-06
ZDHHC2	14994	-7.9158	0	0		C1orf52	1555	4.91664	1e-06	4e-06
SRSF11	12754	-7.91957	0	0		BCAP31	1201	4.91307	1e-06	4e-06
FZD6	4799	-7.93659	0	0		COPS6	2762	4.91297	1e-06	4e-06
CASP8AP2	1852	-7.94184	0	0		HYI	5895	4.90954	1e-06	4e-06
TPR	13898	-7.95517	0	0		PAK3	9354	4.90906	1e-06	4e-06
INTS9	6134	-7.96539	0	0		RLBP1	11147	4.90448	1e-06	4e-06
LIN52	6914	-7.96979	0	0		KCNQ1	6403	4.9041	1e-06	4e-06
YBEY	14851	-7.98138	0	0		ROMO1	11267	4.90295	1e-06	4e-06
CREBRF	2872	-7.98189	0	0		RFTN1	11034	4.90221	1e-06	4e-06
THG1L	13391	-7.98565	0	0		SMIM30	12395	4.90018	1e-06	4e-06
NR3C2	8949	-7.98604	0	0		LRRC57	7419	4.8998	1e-06	4e-06
MTUS2	8334	-7.9874	0	0		CTXND1	3027	4.89727	1e-06	5e-06
NFIX	8727	-8.00811	0	0		FNDC11	4660	4.89724	1e-06	5e-06
CDH7	2184	-8.01138	0	0		URB1-AS1	14453	4.89417	1e-06	5e-06
ZNF385B	15250	-8.01479	0	0		DDX20	3256	4.89192	1e-06	5e-06
PURA	10627	-8.02328	0	0		HSPA4	5851	4.88872	1e-06	5e-06
MLXIP	8035	-8.05392	0	0		CACNB2	1727	4.88807	1e-06	5e-06
KRI1	6662	-8.05571	0	0		IFI27L1	5941	4.8866	1e-06	5e-06
PRMT7	10380	-8.06129	0	0		UBE2M	14314	4.88416	1e-06	5e-06
PCNT	9516	-8.06793	0	0		TADA3	13089	4.88344	1e-06	5e-06
NAAA	8469	-8.07185	0	0		CHMP4B	2422	4.88296	1e-06	5e-06
ZNF519	15333	-8.08103	0	0		MPL	8108	4.88279	1e-06	5e-06
TMEM132E	13561	-8.08842	0	0		RAB34	10719	4.88275	1e-06	5e-06
TRIP11	14022	-8.09138	0	0		ZNF277	15192	4.88057	1e-06	5e-06
DPY19L2	3597	-8.09606	0	0		C1QB	1518	4.87641	1e-06	5e-06
LINC01089	6993	-8.09794	0	0		UBE2MP1	14315	4.87363	1e-06	5e-06
ZMAT4	15079	-8.10624	0	0		CCDC90B	1997	4.87041	1e-06	5e-06
SLC4A8	12252	-8.11049	0	0		ZNF880	15574	4.86942	1e-06	5e-06
RPS6KA3	11404	-8.12721	0	0		RDH11	10968	4.86878	1e-06	5e-06
GIGYF1	5006	-8.12771	0	0		RPS20	11383	4.86756	1e-06	5e-06
TRIM7	14014	-8.13105	0	0		MLNR	8031	4.86397	1e-06	5e-06
ETV6	4116	-8.13454	0	0		TEKT2	13299	4.86343	1e-06	5e-06
LOC643406	7289	-8.13556	0	0		BEX2	1264	4.86319	1e-06	5e-06
ZYX	15630	-8.14235	0	0		CALB1	1747	4.86154	1e-06	5e-06
PDPR	9610	-8.1448	0	0		ZZZ3	15632	4.8602	1e-06	5e-06
ITGB3BP	6228	-8.14643	0	0		SPRED1	12676	4.85955	1e-06	5e-06
PTPN2	10584	-8.15431	0	0		ATF6	964	4.85796	1e-06	5e-06
RHBDL3	11084	-8.15495	0	0		HBG1	5482	4.85584	1e-06	6e-06
SEMA6D	11775	-8.16142	0	0		AMZ1	512	4.85121	1e-06	6e-06
LOC220729	7235	-8.16292	0	0		CFL1P1	2363	4.85058	1e-06	6e-06
LINC01158	7006	-8.16992	0	0		TATDN1	13158	4.84667	1e-06	6e-06
MIR600HG	7994	-8.17331	0	0		FARP1	4424	4.84648	1e-06	6e-06
SIAH2	11967	-8.1782	0	0		VIP	14586	4.84637	1e-06	6e-06
KIF5A	6540	-8.1876	0	0		MMAB	8039	4.84495	1e-06	6e-06
MSRB3	8260	-8.18955	0	0		RGS10	11056	4.84469	1e-06	6e-06
TMEM86B	13725	-8.19979	0	0		NDUFA6-AS1	8610	4.8428	1e-06	6e-06
DPY19L2P3	3600	-8.20274	0	0		LINGO1	7060	4.84189	1e-06	6e-06
EXTL2	4158	-8.20284	0	0		PSTPIP1	10533	4.84149	1e-06	6e-06
SLC8A1	12289	-8.21314	0	0		GTPBP4	5399	4.84043	1e-06	6e-06
ABCA9	36	-8.22332	0	0		LHX2	6887	4.83949	1e-06	6e-06
XKR6	14821	-8.22434	0	0		MLIP	8024	4.83786	1e-06	6e-06
DIS3	3411	-8.23707	0	0		PHLPP2	9754	4.83343	1e-06	6e-06
TUBE1	14214	-8.24238	0	0		PI4KA	9771	4.83338	1e-06	6e-06
SEPT12	11790	-8.24872	0	0		CDC14A	2135	4.83193	1e-06	6e-06
TSTD2	14132	-8.2507	0	0		LNPK	7101	4.83166	1e-06	6e-06
ASTN2	945	-8.25486	0	0		FOXJ3	4694	4.83049	1e-06	6e-06
DDX11	3250	-8.25675	0	0		IGFN1	5999	4.82886	1e-06	6e-06
PIM1	9824	-8.26636	0	0		TMEM200C	13627	4.82665	1e-06	6e-06
ERP44	4082	-8.2793	0	0		BAG2	1158	4.82492	1e-06	6e-06
LIN9	6919	-8.2799	0	0		ARF4	731	4.82265	1e-06	6e-06
GUSBP4	5416	-8.28444	0	0		CALU	1765	4.81897	1e-06	7e-06
PCP4L1	9526	-8.28598	0	0		NECTIN3	8660	4.815	1e-06	7e-06
ZBTB1	14908	-8.28743	0	0		ABI1	81	4.81446	1e-06	7e-06
DCBLD2	3196	-8.29566	0	0		OCRL	9130	4.81398	1e-06	7e-06
COL19A1	2703	-8.29642	0	0		CPNE8	2832	4.81382	1e-06	7e-06
PLAU	9902	-8.301	0	0		CNGB1	2625	4.81286	1e-06	7e-06
CACNB4	1729	-8.30312	0	0		NACC1	8480	4.8119	1e-06	7e-06
TGM1	13362	-8.30338	0	0		PMM1	10014	4.8104	2e-06	7e-06
C5orf24	1629	-8.3063	0	0		PSMD1	10502	4.80724	2e-06	7e-06
CNTLN	2662	-8.3104	0	0		LARS2	6793	4.80718	2e-06	7e-06
LINC01137	7001	-8.32358	0	0		MIEF1	7961	4.80679	2e-06	7e-06
MEF2A	7829	-8.3243	0	0		CALHM1	1754	4.80215	2e-06	7e-06
PIK3CA	9814	-8.33569	0	0		LAMTOR4	6775	4.80015	2e-06	7e-06
LOC101928673	7192	-8.34373	0	0		ATP2C1	1020	4.79761	2e-06	7e-06
PHYH	9762	-8.35228	0	0		RTRAF	11494	4.79582	2e-06	7e-06
STIM2	12867	-8.36714	0	0		CORT	2787	4.79352	2e-06	7e-06
ANKS1A	601	-8.36777	0	0		ELMO2	3896	4.79254	2e-06	7e-06
SRFBP1	12724	-8.37139	0	0		FZD8	4801	4.79223	2e-06	7e-06
PCDH11Y	9459	-8.37858	0	0		LRP1B	7373	4.79162	2e-06	7e-06
ASPSCR1	939	-8.37946	0	0		ASIC2	923	4.78715	2e-06	8e-06
VWC2	14662	-8.38901	0	0		CYBB	3083	4.78701	2e-06	8e-06
GOLGA6L10	5148	-8.39769	0	0		YWHAG	14887	4.78635	2e-06	8e-06
ZNF692	15464	-8.40559	0	0		GPR6	5256	4.78622	2e-06	8e-06
NT5M	9016	-8.4107	0	0		MGAT4B	7923	4.78535	2e-06	8e-06
EMSY	3949	-8.41076	0	0		C16orf70	1480	4.78117	2e-06	8e-06
CACNA2D2	1724	-8.41423	0	0		FAR2P2	4423	4.77995	2e-06	8e-06
DEFB131A	3296	-8.41875	0	0		MILR1	7973	4.77274	2e-06	8e-06
LRRK2	7441	-8.43702	0	0		CSTB	2965	4.76833	2e-06	8e-06
NR3C1	8948	-8.44214	0	0		DHRS7B	3371	4.7633	2e-06	8e-06
POU6F1	10150	-8.44412	0	0		2025-03-04	7683	4.76229	2e-06	9e-06
VCX	14569	-8.44482	0	0		MEI1	7840	4.75907	2e-06	9e-06
ASB13	900	-8.45315	0	0		LOC100506271	7150	4.75689	2e-06	9e-06
FRAT2	4718	-8.45758	0	0		LINC00982	6985	4.75523	2e-06	9e-06
MGST2	7939	-8.45964	0	0		CALM3	1759	4.75504	2e-06	9e-06
EYA4	4163	-8.46094	0	0		NQO1	8932	4.75121	2e-06	9e-06
IL1RAP	6039	-8.46663	0	0		MAPK8IP1	7662	4.75053	2e-06	9e-06
IPW	6151	-8.4783	0	0		HERC4	5562	4.75041	2e-06	9e-06
BTBD3	1395	-8.48567	0	0		WNT7A	14792	4.7488	2e-06	9e-06
TTC39B	14161	-8.48971	0	0		DHDH	3355	4.74867	2e-06	9e-06
ARHGEF10L	783	-8.48999	0	0		RAVER2	10879	4.74823	2e-06	9e-06
AIFM3	374	-8.49197	0	0		SMIM24	12391	4.74785	2e-06	9e-06
KCNC4	6352	-8.49273	0	0		LOC100419583	7144	4.74648	2e-06	9e-06
ZMYM5	15088	-8.49826	0	0		C22orf23	1576	4.74512	2e-06	9e-06
USP45	14505	-8.50237	0	0		CDHR1	2187	4.74202	2e-06	9e-06
GTF3C3	5391	-8.50527	0	0		ALDH4A1	437	4.73815	2e-06	1e-05
PIGL	9796	-8.51314	0	0		HPGDS	5789	4.73637	2e-06	1e-05
SLC5A6	12264	-8.51495	0	0		FLJ37035	4624	4.73591	2e-06	1e-05
DENND1B	3303	-8.5165	0	0		SLC7A11	12279	4.73576	2e-06	1e-05
FGF9	4562	-8.51694	0	0		TYRP1	14264	4.73506	2e-06	1e-05
SLC25A36	12112	-8.52256	0	0		CNRIP1	2659	4.73465	2e-06	1e-05
THSD4	13404	-8.52468	0	0		LOC101929066	7193	4.72956	2e-06	1e-05
STARD10	12840	-8.53149	0	0		DHRS2	3365	4.7282	2e-06	1e-05
SMCO4	12367	-8.53352	0	0		ITPKA	6240	4.7255	2e-06	1e-05
CORO6	2785	-8.55407	0	0		DERL2	3325	4.72138	2e-06	1e-05
ATP2B3	1018	-8.55441	0	0		FN3KRP	4655	4.72048	2e-06	1e-05
HIST1H1D	5621	-8.55695	0	0		EIF1AY	3825	4.72019	2e-06	1e-05
ACAN	107	-8.57032	0	0		FNIP2	4667	4.71875	2e-06	1e-05
DUS1L	3651	-8.57037	0	0		CD99	2129	4.71725	2e-06	1e-05
GALR1	4874	-8.5718	0	0		ICAM3	5908	4.71274	2e-06	1.1e-05
RMI1	11155	-8.5736	0	0		DEGS1	3299	4.71041	2e-06	1.1e-05
METTL15	7865	-8.57454	0	0		WDR31	14709	4.70667	3e-06	1.1e-05
LCA5	6808	-8.58455	0	0		RITA1	11146	4.70439	3e-06	1.1e-05
TAS2R31	13148	-8.59587	0	0		GSG1L	5345	4.7042	3e-06	1.1e-05
ZNF37BP	15245	-8.60946	0	0		BTBD10	1389	4.70413	3e-06	1.1e-05
RANBP17	10811	-8.60975	0	0		FBXO44	4492	4.70068	3e-06	1.1e-05
SMIM3	12394	-8.61906	0	0		CLIC5	2557	4.69654	3e-06	1.2e-05
ACSL6	154	-8.62587	0	0		GRK6	5324	4.68946	3e-06	1.2e-05
CNST	2660	-8.6302	0	0		TMEM65	13713	4.68717	3e-06	1.2e-05
ITGA11	6210	-8.63316	0	0		DNAJA4	3479	4.68651	3e-06	1.2e-05
USP3	14487	-8.63849	0	0		MGMT	7935	4.68593	3e-06	1.2e-05
TEPSIN	13308	-8.64471	0	0		TSPAN18	14105	4.68305	3e-06	1.2e-05
DTWD2	3642	-8.65638	0	0		FDPSP2	4523	4.68192	3e-06	1.2e-05
PPARD	10157	-8.66495	0	0		CACHD1	1713	4.6816	3e-06	1.2e-05
TFAM	13332	-8.67717	0	0		DOK4	3562	4.68044	3e-06	1.2e-05
TIFA	13418	-8.68969	0	0		COL21A1	2705	4.67844	3e-06	1.3e-05
IGFALS	5990	-8.6927	0	0		SLC25A44	12121	4.67812	3e-06	1.3e-05
ITFG2	6208	-8.69845	0	0		MIR100HG	7986	4.67639	3e-06	1.3e-05
RADIL	10786	-8.69972	0	0		ASTN1	944	4.67533	3e-06	1.3e-05
THAP10	13369	-8.72394	0	0		FXYD1	4784	4.67212	3e-06	1.3e-05
GUCA2B	5404	-8.74403	0	0		HBZ	5487	4.67197	3e-06	1.3e-05
FRAT1	4717	-8.75147	0	0		SIN3A	11983	4.66902	3e-06	1.3e-05
CARD9	1819	-8.75457	0	0		CARMIL3	1825	4.6688	3e-06	1.3e-05
ATP8B2	1069	-8.75614	0	0		CARD17	1815	4.66591	3e-06	1.3e-05
CCL27	2017	-8.76212	0	0		TFRC	13350	4.665	3e-06	1.3e-05
TAS2R5	13153	-8.76246	0	0		DPYD	3605	4.66426	3e-06	1.3e-05
LAMA4	6760	-8.77398	0	0		EXD3	4129	4.66255	3e-06	1.3e-05
OSBPL5	9254	-8.7745	0	0		FOXF2	4689	4.66246	3e-06	1.3e-05
MTCL1	8285	-8.77799	0	0		PSMB6	10491	4.65753	3e-06	1.4e-05
FGF13	4551	-8.78498	0	0		STBD1	12859	4.65666	3e-06	1.4e-05
SPTSSB	12704	-8.79239	0	0		NPY	8927	4.65464	3e-06	1.4e-05
ESRRA	4095	-8.79296	0	0		ZNF572	15374	4.6542	3e-06	1.4e-05
TAS2R30	13147	-8.80196	0	0		SLC1A2	12059	4.65272	3e-06	1.4e-05
RNF168	11206	-8.80511	0	0		CCND3	2029	4.65107	3e-06	1.4e-05
UPF3A	14429	-8.80854	0	0		RNF157-AS1	11203	4.6505	3e-06	1.4e-05
CLGN	2551	-8.81131	0	0		TUSC2	14229	4.64932	3e-06	1.4e-05
SLC19A2	12056	-8.81273	0	0		FAM213B	4324	4.64761	3e-06	1.4e-05
SLC44A5	12236	-8.81778	0	0		ERBB2	4041	4.64279	3e-06	1.5e-05
PI4K2A	9769	-8.8335	0	0		L1CAM	6742	4.64119	3e-06	1.5e-05
OSBPL6	9255	-8.84966	0	0		HECTD4	5542	4.64039	3e-06	1.5e-05
NR1D2	8936	-8.8558	0	0		EZR	4166	4.63954	3e-06	1.5e-05
ZFYVE28	15055	-8.86327	0	0		EFEMP2	3779	4.63822	4e-06	1.5e-05
CDADC1	2132	-8.8764	0	0		CX3CR1	3049	4.63465	4e-06	1.5e-05
GTF2H2B	5379	-8.87895	0	0		METTL9	7884	4.63324	4e-06	1.5e-05
SLC16A7	12044	-8.89907	0	0		HEBP1	5536	4.6326	4e-06	1.5e-05
EYA3	4162	-8.9047	0	0		THBD	13382	4.63229	4e-06	1.5e-05
SETBP1	11836	-8.91144	0	0		SERF2	11802	4.62993	4e-06	1.6e-05
ZBED5	14903	-8.91191	0	0		ZFP36L1	15031	4.62696	4e-06	1.6e-05
C1RL	1530	-8.91876	0	0		SLC2A4RG	12158	4.62549	4e-06	1.6e-05
LINC00599	6952	-8.92195	0	0		PHF10	9724	4.6242	4e-06	1.6e-05
FNDC5	4664	-8.93551	0	0		SF3B3	11859	4.62199	4e-06	1.6e-05
SCN1B	11649	-8.93635	0	0		PTPRZ1	10613	4.61831	4e-06	1.6e-05
LRPAP1	7381	-8.94654	0	0		LOC101927974	7182	4.61744	4e-06	1.6e-05
INSR	6117	-8.95325	0	0		NUTF2	9095	4.61453	4e-06	1.7e-05
CCDC177	1946	-8.97181	0	0		CASTOR1	1856	4.61194	4e-06	1.7e-05
DENND4C	3311	-8.97506	0	0		ARHGAP20	751	4.61032	4e-06	1.7e-05
SCN1A	11648	-8.99968	0	0		SAMD4A	11562	4.6091	4e-06	1.7e-05
CLMP	2570	-9.00263	0	0		MED10	7798	4.60904	4e-06	1.7e-05
TRANK1	13941	-9.00657	0	0		AKAP11	394	4.60885	4e-06	1.7e-05
FAM214A	4325	-9.01311	0	0		METTL6	7881	4.60758	4e-06	1.7e-05
ZNF394	15253	-9.01674	0	0		SERINC3	11806	4.60619	4e-06	1.7e-05
SCAF11	11607	-9.01752	0	0		HSD17B8	5834	4.59994	4e-06	1.8e-05
ICA1	5905	-9.02228	0	0		BCKDHB	1214	4.59951	4e-06	1.8e-05
MKNK2	8012	-9.03004	0	0		ELP5	3917	4.598	4e-06	1.8e-05
IDS	5930	-9.07028	0	0		TMEM181	13609	4.5979	4e-06	1.8e-05
IDE	5920	-9.07064	0	0		QSOX1	10679	4.59766	4e-06	1.8e-05
VAMP1	14540	-9.07613	0	0		APCDD1	675	4.59714	4e-06	1.8e-05
OR2AK2	9194	-9.07665	0	0		SUSD3	12988	4.59649	4e-06	1.8e-05
KDM7A	6456	-9.08242	0	0		ZMYND12	15092	4.59413	4e-06	1.8e-05
SECISBP2	11737	-9.08441	0	0		ARHGEF40	800	4.59337	4e-06	1.8e-05
DCUN1D2	3224	-9.09301	0	0		GOLGB1	5154	4.59202	4e-06	1.8e-05
MCF2L	7747	-9.11258	0	0		S100Z	11539	4.59201	4e-06	1.8e-05
KRTCAP3	6733	-9.11494	0	0		TMEM47	13696	4.59198	4e-06	1.8e-05
PRDM11	10302	-9.12479	0	0		P4HA2	9318	4.59196	4e-06	1.8e-05
ZBTB40	14930	-9.12954	0	0		PACSIN1	9336	4.58313	5e-06	1.9e-05
IGLL1	6002	-9.13593	0	0		LINGO3	7062	4.58253	5e-06	1.9e-05
FAM71E1	4372	-9.13949	0	0		IQCA1	6152	4.58243	5e-06	1.9e-05
SCRT1	11672	-9.15066	0	0		EIF1	3822	4.58155	5e-06	1.9e-05
SPAG4	12592	-9.15367	0	0		TUBB	14204	4.58131	5e-06	1.9e-05
CDR2L	2238	-9.17451	0	0		MRPS6	8229	4.57917	5e-06	1.9e-05
TRPM3	14060	-9.18813	0	0		C9orf40	1680	4.57912	5e-06	1.9e-05
CEP135	2296	-9.19465	0	0		ADORA2B	289	4.57751	5e-06	2e-05
MTPAP	8323	-9.20456	0	0		CFAP70	2352	4.57695	5e-06	2e-05
BBS7	1195	-9.20791	0	0		KRT14	6666	4.57442	5e-06	2e-05
RSPO2	11462	-9.20864	0	0		TTLL1	14177	4.57374	5e-06	2e-05
FOXN3	4700	-9.22944	0	0		SNAI3-AS1	12426	4.57306	5e-06	2e-05
FER1L4	4533	-9.23889	0	0		SATL1	11592	4.57198	5e-06	2e-05
TIAM1	13414	-9.24312	0	0		MFSD10	7900	4.56464	5e-06	2.1e-05
EIF2A	3827	-9.24332	0	0		MPPED1	8118	4.5628	5e-06	2.1e-05
ELMOD3	3900	-9.24375	0	0		TMEM132A	13557	4.56224	5e-06	2.1e-05
ANKH	541	-9.24948	0	0		C11orf95	1448	4.56009	5e-06	2.1e-05
GPAT3	5177	-9.26202	0	0		RPL36	11337	4.55784	5e-06	2.1e-05
ZNF333	15223	-9.29493	0	0		TGFBR3L	13359	4.55713	5e-06	2.1e-05
KCNK12	6387	-9.31332	0	0		GNA12	5095	4.55599	5e-06	2.2e-05
METTL24	7872	-9.32603	0	0		ZNF280C	15196	4.55597	5e-06	2.2e-05
MOGAT1	8071	-9.32672	0	0		LOC105379807	7222	4.55563	5e-06	2.2e-05
SLC39A13	12217	-9.32933	0	0		CYP1B1	3097	4.55052	5e-06	2.2e-05
WDPCP	14695	-9.33133	0	0		TUFM	14222	4.55016	5e-06	2.2e-05
CCDC58	1969	-9.36035	0	0		NWD1	9098	4.54973	5e-06	2.2e-05
TCHP	13259	-9.36553	0	0		COA3	2678	4.54956	5e-06	2.2e-05
KLF9	6576	-9.37576	0	0		ASL	927	4.54756	5e-06	2.2e-05
PHKA2	9744	-9.38627	0	0		SUPT4H1	12977	4.54422	6e-06	2.3e-05
HPS1	5793	-9.3908	0	0		NRL	8973	4.53604	6e-06	2.4e-05
SLC25A37	12113	-9.41767	0	0		PDS5A	9612	4.53313	6e-06	2.4e-05
HDAC4	5511	-9.42805	0	0		DCLK2	3204	4.5283	6e-06	2.4e-05
UBE2QL1	14323	-9.42835	0	0		AGPAT1	345	4.52532	6e-06	2.5e-05
ABCD2	50	-9.42899	0	0		POC1A	10059	4.5251	6e-06	2.5e-05
RRNAD1	11438	-9.43124	0	0		ETFDH	4106	4.52448	6e-06	2.5e-05
LPCAT4	7346	-9.43265	0	0		GLI3	5047	4.51987	6e-06	2.5e-05
UBAP1L	14287	-9.45106	0	0		HMGCL	5718	4.51937	6e-06	2.5e-05
JAK2	6264	-9.46865	0	0		WDR47	14723	4.51813	6e-06	2.6e-05
PANK1	9368	-9.47105	0	0		RAB6D	10744	4.51737	6e-06	2.6e-05
OVGP1	9287	-9.47189	0	0		PIFO	9788	4.51465	6e-06	2.6e-05
PAG1	9345	-9.47815	0	0		TRIB3	13968	4.5128	6e-06	2.6e-05
ITPKC	6242	-9.49142	0	0		RELN	10992	4.5096	6e-06	2.7e-05
MTAP	8281	-9.51413	0	0		INPP5K	6110	4.50953	6e-06	2.7e-05
USP13	14472	-9.53099	0	0		KCTD21	6428	4.50899	7e-06	2.7e-05
SLC2A8	12161	-9.53485	0	0		FAM163B	4266	4.50805	7e-06	2.7e-05
B3GALNT2	1117	-9.54	0	0		SRR	12745	4.50676	7e-06	2.7e-05
NAA16	8460	-9.56161	0	0		DYNC1I1	3686	4.50467	7e-06	2.7e-05
UCP3	14378	-9.56516	0	0		CCDC8	1984	4.50434	7e-06	2.7e-05
CEP152	2297	-9.56985	0	0		ADAMTS9	226	4.50137	7e-06	2.7e-05
LINC01637	7032	-9.58031	0	0		ARL8A	837	4.5	7e-06	2.8e-05
HS3ST1	5811	-9.58272	0	0		SBF1	11598	4.49829	7e-06	2.8e-05
CAPN15	1798	-9.60057	0	0		PIGF	9792	4.49828	7e-06	2.8e-05
GNRH1	5135	-9.60232	0	0		UAP1	14273	4.49445	7e-06	2.8e-05
SCLT1	11645	-9.6065	0	0		MAL2	7579	4.48994	7e-06	2.9e-05
TLE2	13467	-9.60858	0	0		ENTPD6	3987	4.48906	7e-06	2.9e-05
LINC01102	6995	-9.64029	0	0		RNF11	11175	4.48771	7e-06	2.9e-05
DMKN	3454	-9.64063	0	0		FAM171A2	4274	4.48623	7e-06	2.9e-05
CLK3	2567	-9.65475	0	0		ZNF184	15133	4.483	7e-06	3e-05
SZT2	13071	-9.65733	0	0		BTBD1	1388	4.48232	7e-06	3e-05
FMN2	4646	-9.67811	0	0		ECHDC1	3731	4.48015	7e-06	3e-05
SUGP2	12954	-9.7029	0	0		LST1	7472	4.48011	7e-06	3e-05
SPTB	12696	-9.72015	0	0		P2RY12	9308	4.47971	7e-06	3e-05
[truncated: 212 more rows]

## Sheet: Sheet S5
Sheet S5. Results of layer enrichment analysis for PLS1+/- genes
Enrichment for PLS1+ genes
Layer	numGeneOverlap	p-value	p-fdr	Genes
L1	87	0.008	0.0156	SSR4, RAB34, UBA52, CD53, CTSH, FCGBP, VAMP8, TSEN34, TP53I3, WTIP, CIB1, VSIG4, ARHGAP4, FABP7, GMFG, PSME2, MT1JP, DHRS9, PON3, RPL12, CARD16, FBXO2, RPLP1, CASP1, EMP3, FTL, SIVA1, IFI27L2, RAB32, RPL27A, MT2A, FOLR2, PSME1, MT1L, HSPB1, CD63, SIGIRR, CYBB, EFEMP2, CXCL14, HCST, PRDX1, RELN, TNNI3, PRSS23, S100A6, CETN2, PNP, HPGDS, RGS10, MAPK3, RPL36, CAPG, SUSD3, RAMP1, PHPT1, CYP1B1, MT1F,…
L2	140	<0.001	0.001	CA4, C20orf27, OLFM4, CDC6, KCNN2, SOWAHA, C2CD4C, CPNE6, FFAR4, BATF3, ADAMTS8, GGCT, P2RX5, DGKA, LRRN1, MED8, ASS1, ANXA11, VSTM2L, FAM110C, HTR3B, TMEM200A, CRIP2, RASGRF2, NDST3, GSG1L, B9D1, RAP2B, KLHDC8B, PRKCD, KLHL25, HTR7P1, DDRGK1, IDH2, CNR1, C2orf80, SLC27A2, KCNG1, ZCCHC12, DOC2B, PTHLH, EHBP1L1, C2CD2L, NECAB2, CALB1, ATP9B, SYTL5, FKBP1A, E2F3, CPNE8, DGKB, INSM1, FAM213B, KIRREL…
L3	20	0.998	1	COL5A2, PSEN2, ACTC1, RTP1, BAIAP3, GPR6, SLC30A3, FHOD3, FIG4, DTX4, CCNA1, FAM174B, EPHA10, DENND1A, SEMA4F, GPX3, SND1, HSPB3, LPL, NT5DC3
L4	35	0.663	0.994	CPNE7, CALHM1, NOV, NEUROD6, FJX1, BCKDK, SPHKAP, ZFP64, RTN3, STAT6, CLCN6, MINOS1, AMIGO2, FZR1, BEND5, LRSAM1, CCDC68, PLCH1, RTBDN, SNCG, KLHDC8A, FAM163B, RCHY1, TRAPPC9, SLC22A18, SULF2, SGSM1, CAMK2D, ATG7, KIF17, CD83, GAL, GDF10, GRM8, TYRP1
L5	30	<0.001	0.001	PID1, CELF4, ADTRP, HTR2C, VAT1L, SNCA, RXFP1, MAP2K1, CRIM1, RSPO3, LDHA, NKD2, UHMK1, NTNG2, ITGB1BP1, FAM102B, NMNAT3, SYT1, DENR, GALNT14, ARMCX1, GCNT1, BCL11B, COG1, PIK3CD, PDE1A, CHRNA4, SSTR2, KLHL1, ARHGAP25
L6	105	1	1	PTPRZ1, SYTL2, PHF10, ME2, SH3GL3, EIF3J, IGSF11, VBP1, SLA, CKS1B, RNF139, BCKDHB, TMEM117, TAOK1, KCNMB4, TSPAN18, NPY, PELI1, GTF2H5, ECHDC1, KIF2A, PTBP2, ZNF350, SH3BGR, PDGFRA, GXYLT2, RRAGC, DEGS1, PDS5A, ISOC1, ATF6, SFRP1, RAB10, SEMA3D, CARHSP1, C22orf23, LYPLAL1, SMAD2, UBE2A, HNRNPC, FILIP1, AGTPBP1, SLC16A8, TMED10, STX7, HMGB1, GPM6B, GRM3, PTP4A1, TMEM9B, DIRAS3, LRP1B, LIX1L, RBM8…
Enrichment for PL1- genes
Layer	numGeneOverlap	p-value	p-fdr	Genes
L1	26	1	1	MVB12A, MGST2, CTSC, MXD4, DPM3, DUSP1, ITM2A, SLC38A5, RERGL, CARD9, GADD45B, PTPRCAP, MYL12A, RPSA, RAMP3, PLAT, ATP4A, EEF1D, IER2, CTSZ, FBLIM1, FAM20A, SMCO4, LMO2, DEGS2, CRABP1
L2	31	0.999	1	FAM210B, RGS6, SEC14L1, HSPB6, THEM4, INHBA, NELFA, TNFRSF25, CHRNA2, TRERF1, KREMEN1, TMEM132E, RASD2, SIAH2, BTBD3, BTBD11, CDC42EP3, COL5A1, KNDC1, PENK, PRKCA, EDN3, KCNH4, THSD7A, LINC00599, SUN1, FGF14, CMYA5, RSAD1, PDIA5, HMGXB3
L3	63	<0.001	0.001	OSBP2, INA, CIT, RGS7, KCNC1, NTNG1, PVR, SLC35C1, TMEM127, SLC17A6, LRRC4, UBE2O, SHD, SV2C, CACNA1A, TMEM229B, CLEC16A, LRRK2, JDP2, XYLT2, FAM110A, RCC2, TENM2, FAM160B2, ESRRA, RORA, TNIP1, HS6ST2, ABCG4, ALDH1A3, STS, CPSF1, IFFO1, SLC9A5, LYPD5, ABCC8, EPN3, CITED2, CLN6, PKNOX2, VIPR2, TSPAN9, BEAN1, PPFIA4, FAM222B, TIAM1, MAST4, SCN1A, P2RX6, FAM78B, GALE, SLC39A14, MLXIP, JAK1, C8orf31,…
L4	83	<0.001	0.001	ZNF250, PIP5KL1, CPLX1, WIPI1, FLRT3, ST3GAL6, ANKRD29, SLC9A1, STX1B, MID2, TBC1D8, PPL, HUNK, SCRT1, PVALB, MZF1, DCBLD2, KCTD9, TANGO2, HR, NIPAL2, YARS, PHTF1, TCF7L2, CPNE9, PPARGC1A, DCLK1, CACNA2D2, HS3ST1, TTC39C, ZYX, KCNC4, OGDHL, SYT2, VAMP1, CHGA, INSM2, FLT3, SLC47A1, IL1RAP, RHBDL3, UNKL, PPIP5K1, ECM1, MAP4K2, LIN7A, TAF4B, CDS1, ESRRG, TSHZ3, PNPO, NREP, POLR1D, GPR161, RCN3, RAB3…
L5	11	0.708	1	TBR1, FAM43A, NRG1, FOXP2, FAM43B, TENM4, ANKS1A, LYSMD4, CAMK2G, PASK, GFRA2
L6	201	0.999	1	KLHL24, GOLGA4, SUPT20H, CRTC3, MTDH, TRMT13, ZNF146, OSGEPL1, CEP97, PHF3, ERCC4, MTFR1, ZKSCAN8, LARP7, ZNF652, ZNF565, MRPL48, KTN1, HBP1, CASP3, APIP, ANKRA2, HAT1, RAB30, TMEM41B, SLC15A4, FCHO2, ZNF507, ZCCHC7, UBE2G1, C2orf68, SRFBP1, HSD17B11, B3GNT9, ZFP37, SIRT1, ZNF33A, SMAD5, KCTD3, RBM39, MNS1, POGK, SAR1B, CHD1, STAM2, ZNF615, NUP107, MAN2A2, CNTRL, C4orf3, TCAIM, ST7L, RPE, CASP8AP…

## Sheet: Sheet S6
Sheet S6. Results of cellular overlapped genes with PLS1+/- genes
Enrichment for PLS1+ genes
cellType	numGeneOverlap	p-value	p-fdr	Genes
Astro	212	<0.001	0.001	SARDH, FERMT2, RANBP3L, SLCO1C1, TMEM47, SLC39A12, LGR4, MT2A, LINC00839, ACO2, PAX6, IGFN1, FAM107A, PON3, LHX2, RGS20, PLTP, BHMT2, GPD2, FUT9, EYA2, ALDH2, CLDN10, SLC30A10, RYR3, STON2, DDAH1, MOXD1, MLC1, GJA1, EMID1, GABRB1, NQO1, CLU, LINC00595, SLC44A3, ACKR3, DMGDH, CACNB2, HOPX, PHACTR3, FAM213A, HEPH, ALDH1L1, GLI3, ZFP36L1, TMEM164, OAF, FAM167A, LRRC3B, APOE, ACAA2, ARHGEF4, EPHX1, G…
Endo	117	0.571	0.666	MYL12B, TWIST1, SLC39A10, C1R, HES4, ARL15, CCNY, IFI6, GRP, CD63, RPL41, CPAMD8, DIO3, PDE4C, TBPL1, OPTN, ISG15, FAM213A, CAPN12, S100A10, TMSB10, GUK1, DOCK9, MT1A, MT1M, CRIM1, ADIRF, SLC16A2, TUBB, TFRC, HMGB1, ASS1, DDN, CA4, CAP1, VIT, TTLL1, RPL36, NTAN1, PKIG, JUN, RSU1, PHF10, RPS20, MT1F, CLIC5, P4HA2, EDN1, BIRC3, RPL27A, LGALS1, SYNPO2, ANO2, PALMD, SLCO2A1, MT1E, VAT1, MYADM, SERF2,…
Micro	98	0.095	0.167	PTGER4, MAN1A1, MRC1, TPM3P9, SKAP2, LYN, ARPC2, FCGBP, TRIB1, RGS18, TFEC, FOLR2, VSIG4, CYBB, RNF149, TXLNB, NAV3, GRID2, YIPF1, RHBDF2, RNASET2, LPL, HCST, BCAS2, CD53, RGS10, MR1, SFMBT2, CAP1, PELI1, GTPBP4, DGKA, UBE2E2, FAM149A, HPGDS, SUSD3, RILPL2, ARHGDIB, DHRS9, GGTA1P, AMZ2P1, ADAP2, TMEM106A, WDFY4, EGR3, RAB32, RASGEF1C, P2RY13, TNFRSF11A, B3GNTL1, PLCB2, CORO1A, IL1B, DUSP6, METAP1…
Neuro-Ex	238	<0.001	0.001	MAN1A1, CNRIP1, NEDD4L, BAALC, DZIP3, NETO1, CA10, SLC39A10, KCNT2, PLCH1, AK5, SLIT1, TMEM130, ARL15, SYTL2, ATP9A, SYN2, COL11A1, FUT9, TUBB2A, SUSD4, TENM3, NCAM2, YWHAH, RYR3, B4GAT1, TUBA1B, GABRB1, BSN, CLU, FTH1, PI4KA, RXFP1, CALM3, FAM49A, ASIC2, BEX2, NAV3, PDE2A, OPTN, PACSIN1, CNTN3, NPTXR, GULP1, CDH8, TMSB10, SNCA, ATP6V1E1, GUK1, SV2B, ST6GALNAC5, AKAP11, SLIT3, TMEM59L, TMEM108, T…
Neuro-In	173	<0.001	0.001	RELN, MAN1A1, NEDD4L, NETO1, KCNT2, LINC01197, PLCH1, AK5, ARL15, TMEM130, SYN2, HECTD2, VIP, CALB1, COL11A1, NETO2, FUT9, TUBB2A, IGF1, SUSD4, TENM3, NCAM2, RYR3, GABRB1, CNR1, ROBO1, FAM49A, CALM3, ASIC2, BEX2, CACNB2, L3MBTL4, FAM19A5, FSTL5, ARHGAP20, GRID2, NPTXR, CNTN3, GULP1, CDH8, PLCE1, FXYD6, DOCK9, ST6GALNAC5, TMEM59L, TMEM108, TMSB4X, DGKB, PLS3, LRP1B, PRNP, NDST3, CELF5, PCLO, CCK, …
Oligo	51	1	1	RASAL1, DHCR24, SPPL3, CA10, MAPK8IP1, ANKRD28, 2025/3/1, AK5, ZZZ3, GDE1, KCNMB4, FAM229B, GRM3, DPYD, ANK3, KIF2A, NCAM2, NKAIN2, UBE2E2, GSKIP, CDK17, TAOK1, TCFL5, ZNF572, TMEFF2, RAB40B, TMEM258, SFRP1, KLHL2, KCTD4, PDHB, PHACTR3, DLG2, CDC42SE2, GPM6B, GNAZ, PTBP2, COL16A1, RNASEH2A, HEBP1, TMEM230, SENP2, SH3GL3, KIRREL3, PDGFRA, ELP5, ECHDC1, AGTPBP1, PDE1A, WRB, XYLT1
OPC	23	0.248	0.347	NRCAM, BCAN, CA10, 2025/3/1, PDZD2, CHL1, PID1, LRP1B, SEZ6L, COL11A1, CD81, NCAM2, SOX5, ADGRL3, XKR4, SHISA9, NKAIN3, GRID2, LUZP2, PDGFRA, MARCKS, PTPRZ1, XYLT1
Enrichment for PL1- genes
cellType	numGeneOverlap	p-value	p-fdr	Genes
Astro	69	0.999	0.999	EFNA5, TRPM3, MUTYH, OSBPL2, SYCP2, PPP2R2B, GOLGA2P5, CEP85L, MOK, NBPF10, PLOD2, RAB30, BRINP2, CDHR3, PCDHGB7, DNAAF5, KNDC1, LGR6, CAMK2G, ADCY8, PPFIA1, ORAI3, SLC38A1, ABCA7, KCNA2, AGL, PPARGC1A, ZNF717, LINC01158, RALGAPA2, CLEC16A, GPR19, ACSL6, POU3F2, TPCN1, NBPF1, TSHZ1, IQCH-AS1, MKLN1, SORBS1, PRDM5, PARP3, NAT8L, CA12, VAV3, NEK1, PPP1R3D, TET1, MAST4, XYLT2, PLCD4, PCDHGA7, ADAM20…
Endo	113	0.527	0.999	SLC38A11, DUSP1, SAV1, SLC39A13, TSPAN9, SEC14L1, SMOC2, PTH1R, RSAD2, ECM1, GPR85, PLXDC1, MRGPRF, EDNRA, IGF1R, WIPI1, SYT15, CHST12, SLCO4A1, ELOVL7, ZNF407, ST6GALNAC1, TNIP1, EEF1D, UTRN, CCNL1, CNTLN, ZBTB38, PLAT, QRFPR, THSD4, INSR, NFKBIA, RERGL, PLCB4, DDX11, SLC5A6, HERC2P2, ZNF394, ITGA11, ACTN4, MYL12A, SLC39A8, GPR108, PPARD, RAMP3, LNX2, LAMA4, ESM1, TSC22D1, LAMC1, PHACTR2, NEAT1,…
Micro	78	0.741	0.999	SLC15A4, HS3ST1, ARL5A, SYNE4, NUP54, HLA-DPB1, CHD9, MYC, CDC42SE1, FAM49B, GHRLOS, MPP1, ZNF490, NKX3-1, ZNF805, CNOT1, LYPLA1, POPDC2, RRM2B, CDC42EP3, USP53, RUNX2, LRRFIP1, ARHGAP9, FAM135A, PKN2, POU2F2, EEPD1, NCOA3, NEAT1, TGFBR1, ARID3B, ADAM9, REL, CD274, IL6R, ZBTB1, CTSC, EMB, XIRP1, MAML3, HAUS8, SLC12A6, BHLHE41, JDP2, ZBTB21, SPHK1, PPIG, SOAT1, CITED2, KDM7A, USP15, CHD1, MAP2K3, …
Neuro-Ex	185	0.003	0.009	TRPM3, SLC38A11, PDE10A, RGS6, CKMT1B, ZNF385B, TTC39C, POU6F2, CNTNAP5, XKR6, DLGAP1-AS4, GRAMD1B, TRPC3, CAMK2G, CEND1, BRINP1, OSBP2, NFIX, LPCAT4, CCSER1, CTTNBP2, INPP5F, ATP2B2, RBMS1, CPLX1, GOLGA8A, PKD1, THSD7A, INA, GNAS, KIAA1217, SUGP2, MAST4, UBL3, STRBP, SETBP1, CACNA1C, HS6ST2, BACH2, ANKRD36B, KCND3, PRDM2, RORB, SPTBN4, PLXNA4, GPR158, PLEKHA6, SCN1B, PTPRT, FOXP2, SLC44A5, ROCK2…
Neuro-In	163	<0.001	0.001	ZNF385B, RGS6, CNTNAP5, CDHR3, BEND6, TRPC3, SV2C, PHTF1, BTBD11, KCNAB3, LPCAT4, COL19A1, CCSER1, RNF180, PPARGC1A, ADAM22, CTTNBP2, INPP5F, CPLX1, THSD7A, SYT15, KIDINS220, GNAS, KIAA1217, MAST4, ETV6, SETBP1, CACNA1C, BACH2, PEG3, KCND3, SPTBN4, PTPRE, PLXNA4, GPR158, FAM135B, PTPRT, SLC44A5, RERG, CDK8, PLCB4, NRG1, CADPS2, SCN1A, RNF157, GIT2, MAP9, GRIN2A, TRIO, CLVS2, CCNI, CACNA1A, LRRFIP…
Oligo	74	0.999	0.999	KIZ, CDK19, FKBP7, ZNF565, DSCAML1, NIPA1, PPP2R2B, UTP15, CLCN4, KBTBD2, PWWP2A, KCNK10, MBNL2, ABCG1, ACVR1C, PCNA, FRMD5, MTF1, FBXO32, KMT2E, MXI1, NXPE3, SPECC1, RNF144A, PTPDC1, TRMT13, ZNF268, SERAC1, PALB2, FAM219A, PPM1B, ERMP1, ABHD17B, GOLGA4, ZGRF1, MTFR1, AZGP1, POGK, RMND5A, WDPCP, RICTOR, STRN, YBEY, PYROXD1, CASP8AP2, ST3GAL5, ZNF415, SLC24A2, AFG3L1P, PPP1R16B, HSD11B1, GALR1, MC…
OPC	9	0.998	0.999	SCN1A, SNTG1, DSCAML1, DSCAM, PRKCA, CMYA5, KLF12, ASTN2, CTTNBP2

## Sheet: Sheet S7
Category	Pathway	Gene_Set	N_Genes	Real_Score	P_value	P_FDR_BH
GO Biological Processes	regulation of vesicle-mediated transport	PLS1+	87	0.622056	0.0196078	0.0373483
GO Biological Processes	protein localization to membrane	PLS1+	90	0.609108	0.0196078	0.0392157
GO Cellular Components	postsynapse	PLS1+	148	0.644093	0.0196078	0.0412797
GO Molecular Functions	oxidoreductase activity	PLS1+	108	0.619938	0.0196078	0.043573
GO Biological Processes	regulation of membrane potential	PLS1+	88	0.647118	0.0196078	0.0461361
GO Cellular Components	Schaffer collateral - CA1 synapse	PLS1+	32	0.629323	0.0196078	0.0490196
GO Molecular Functions	GTPase activity	PLS1+	64	0.633285	0.0196078	0.0522876
GO Biological Processes	regulation of synapse structure or activity	PLS1+	64	0.634303	0.0196078	0.0540224
GO Biological Processes	export from cell	PLS1+	88	0.623124	0.0196078	0.0603318
GO Biological Processes	response to toxic substance	PLS1+	53	0.649213	0.0196078	0.0653595
GO Biological Processes	behavior	PLS1+	107	0.64249	0.0196078	0.0713012
GO Biological Processes	regulation of trans-synaptic signaling	PLS1+	111	0.623331	0.0196078	0.087146
GO Cellular Components	melanosome	PLS1+	34	0.639481	0.0196078	0.0980392
GO Biological Processes	regulation of secretion by cell	PLS1+	104	0.642478	0.0196078	0.112045
GO Biological Processes	neuron projection development	PLS1+	123	0.650105	0.0196078	0.130719
GO Cellular Components	cell body	PLS1+	105	0.636738	0.0196078	0.156863
GO Biological Processes	synapse organization	PLS1+	83	0.640804	0.0196078	0.196078
GO Cellular Components	axon	PLS1+	124	0.654101	0.0196078	0.261438
GO Biological Processes	trans-synaptic signaling	PLS1+	99	0.623196	0.0196078	0.392157
GO Cellular Components	presynapse	PLS1+	139	0.653993	0.0196078	0.784314
GO Molecular Functions	transcription coregulator activity	PLS1-	90	-0.558726	0.0196078	0.0206398
GO Molecular Functions	transferase activity, transferring one-carbon groups	PLS1-	45	-0.558732	0.0588235	0.0206398
GO Biological Processes	macromolecule methylation	PLS1-	26	-0.523788	0.0588235	0.0206398
GO Biological Processes	chromatin remodeling	PLS1-	100	-0.567475	0.0196078	0.0211977
GO Molecular Functions	tubulin binding	PLS1-	56	-0.571988	0.0196078	0.0217865
GO Molecular Functions	kinase activity	PLS1-	88	-0.588243	0.0196078	0.022409
GO Cellular Components	centriole	PLS1-	32	-0.589879	0.0196078	0.0230681
GO Biological Processes	regulation of DNA metabolic process	PLS1-	64	-0.54973	0.0196078	0.0237671
GO Biological Processes	intracellular receptor signaling pathway	PLS1-	46	-0.616646	0.0196078	0.0245098
GO Biological Processes	chromosome organization	PLS1-	58	-0.555544	0.0196078	0.0253004
GO Molecular Functions	ribonucleoside triphosphate phosphatase activity	PLS1-	92	-0.573064	0.0196078	0.0261438
GO Biological Processes	DNA metabolic process	PLS1-	98	-0.582868	0.0196078	0.0270453
GO Molecular Functions	chromatin binding	PLS1-	81	-0.549432	0.0196078	0.0280112
GO Molecular Functions	metal ion transmembrane transporter activity	PLS1-	72	-0.626778	0.0196078	0.0290487
GO Cellular Components	ribonucleoprotein granule	PLS1-	103	-0.56669	0.0196078	0.0301659
GO Cellular Components	centrosome	PLS1-	104	-0.563844	0.0196078	0.0313725
GO Biological Processes	mRNA metabolic process	PLS1-	93	-0.564599	0.0196078	0.0326797
GO Molecular Functions	catalytic activity, acting on a nucleic acid	PLS1-	97	-0.539244	0.0196078	0.0341006
GO Molecular Functions	transcription factor binding	PLS1-	96	-0.573952	0.0196078	0.0356506
GO Cellular Components	fibrillar center	PLS1-	30	-0.579497	0.0196078	0.0784314
